# Supplementary material for: A SARS-CoV-2 neutralizing antibody protects from lung pathology in a COVID-19 hamster model
Source: PubMed Central journal article supplement — bioRxiv. 2020 Aug 16:2020.08.15.252320. Preprint. [Version 1] doi: 10.1101/2020.08.15.252320 (PMC7430590; doi:10.1101/2020.08.15.252320), 2020-08-16
Supplement: NIHPP2020.08.15.252320-supplement-1.pdf [file NIHPP2020.08.15.252320-supplement-1.pdf]

## SUPPLEMENTARY MATERIALS

### **Title: SARS-CoV-2 neutralizing antibody protects from lung pathology in a COVID-19 hamster model**

Jakob Kreye<sup>†,\*</sup>, S Momsen Reincke<sup>†</sup>, Hans-Christian Kornau, Elisa Sánchez-Sendin, Victor Max Corman, Hejun Liu, Meng Yuan, Nicholas C. Wu, Xueyong Zhu, Chang-Chun D. Lee, Jakob Trimpert, Markus Höltje, Kristina Dietert, Laura Stöffler, Niels von Wardenburg, Scott van Hoof, Marie A Homeyer, Julius Hoffmann, Azza Abdelgawad, Achim D Gruber, Luca D Bertzbach, Daria Vladimirova, Lucie Y Li, Paula Charlotte Barthel, Karl Skriner, Andreas C Hocke, Stefan Hippenstiel, Martin Witzenrath, Norbert Suttorp, Florian Kurth, Christiana Franke, Matthias Endres, Dietmar Schmitz, Lara Maria Jeworowski, Anja Richter, Marie Luisa Schmidt, Tatjana Schwarz, Marcel Alexander Müller, Christian Drosten, Daniel Wendisch, Leif E Sander, Nikolaus Osterrieder, Ian A Wilson, Harald Prüss\*

† These authors contributed equally.

\* Correspondence to:

Jakob Kreye & Harald Prüss

German Center for Neurodegenerative Diseases (DZNE) Berlin

c/o Charité – Universitätsmedizin Berlin

CharitéCrossOver (CCO), Charitéplatz 1, 10117 Berlin, Germany

Email: [jakob.kreye@dzne.de](mailto:jakob.kreye@dzne.de); [harald.pruess@dzne.de](mailto:harald.pruess@dzne.de).

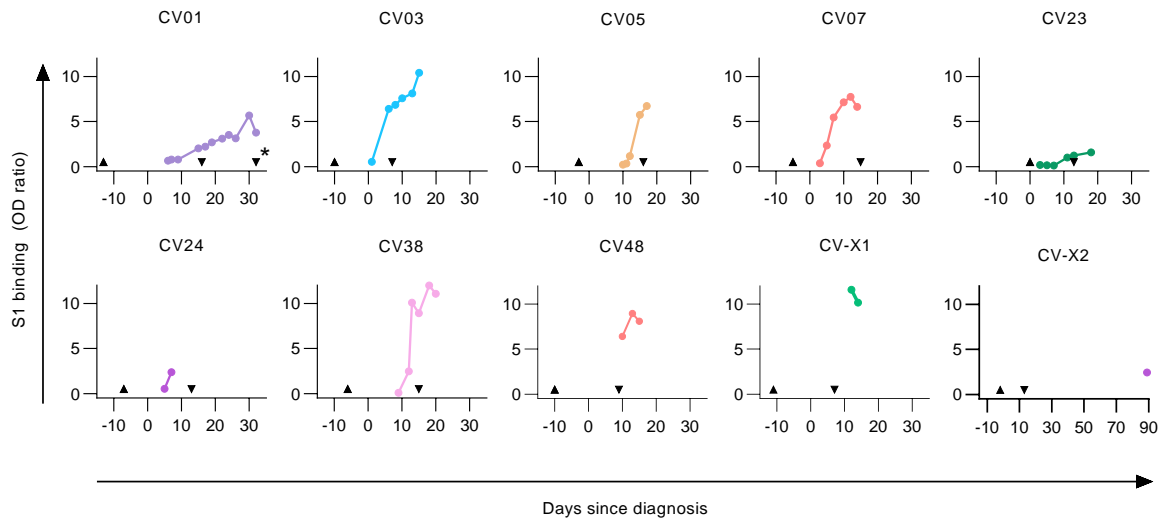

**Fig. S1 | SARS-CoV-2-S1 serum IgG response from COVID-19 patients.**

Serum IgG response determined as the normalized optical density (OD) in a SARS-CoV-2-S1 ELISA in relation to the time point of diagnosis defined by the first positive qPCR test. Upward arrowhead denotes the appearance of first symptoms. Downward arrowhead denotes the PBMC isolation. From patient CV01, PBMC samples were isolated at two time points as indicated by the second downward arrow with an asterisk (\*).

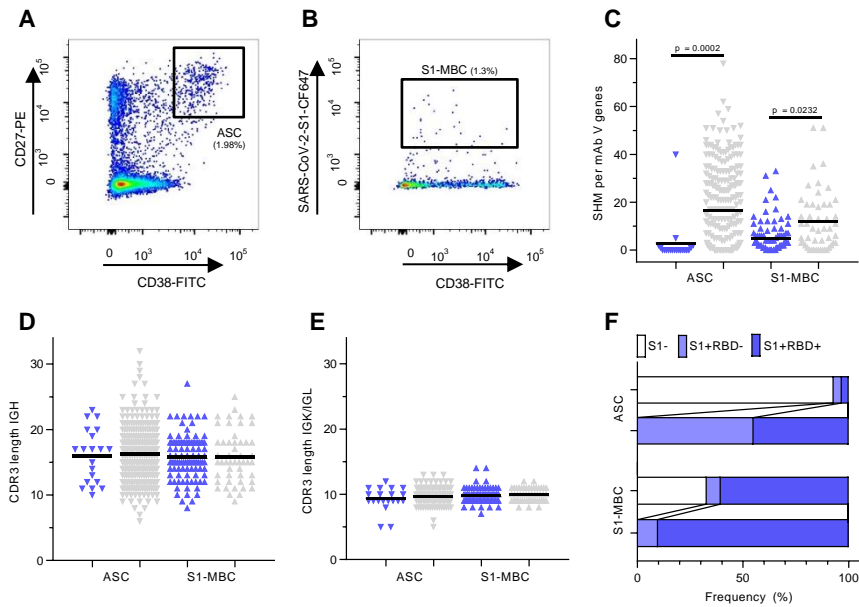

**Fig. S2 | Flow cytometry gating and characteristics of immunoglobulin sequences.**

(A-B) A representative flow cytometry plot from patient CV38 indicating gating on (A) CD19<sup>+</sup>CD27<sup>+</sup>antibody-secreting cells (ASC) and (B) SARS-CoV-2-S1-stained memory B cells (S1-MBC). Cells were pre-gated on live CD19<sup>+</sup> B cells. (C) Comparison of somatic hypermutation (SHM) count within immunoglobulin V genes combined from heavy and light chains of S1-reactive (S1+, blue) and non-S1-reactive (S1-, grey) mAbs. Statistical significance was determined using a one-way ANOVA ( $F = 19.22$ ) with posthoc Tukey's multiple comparisons tests. (ASC:  $n = 20$  S1+,  $n = 260$  S1-; S1-MBC:  $n = 102$  S1+,  $n = 50$  S1-). All expressed mAbs are displayed. Each triangle represents a S1+ (blue) or S1- (grey) mAb, isolated from an ASC (pointing downwards) or a S1-MBC (pointing upwards). (D-E) Length comparison of complementarity-determining region (CDR) 3 amino acid sequences between S1+ and S1- mAbs within (D) heavy and (E) light chains. Symbols and colors have the same meaning as in (C). (F) Frequency of RBD-binder (S1+RBD+) and non-RBD-binder (S1+RBD-) relative to all expressed mAbs (upper lanes) and relative to S1+ mAbs (lower lanes).

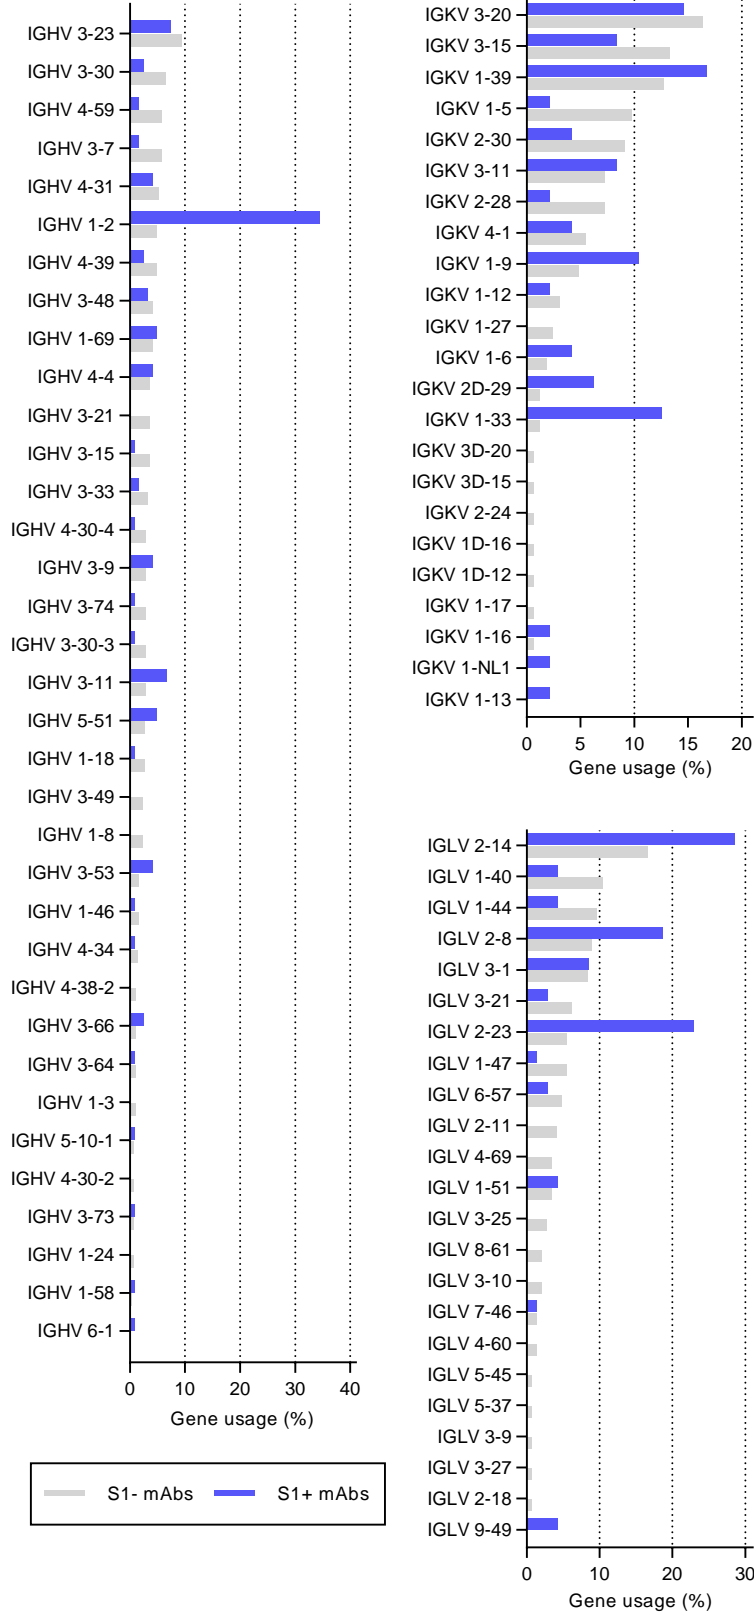

**Fig. S3. | Comparison of variable gene usage.**

Comparison of gene usage between SARS-CoV-2-S1-reactive (S1+) and non-reactive (S1-) mAbs is shown for immunoglobulin **(A)** variable heavy (IGHV), **(B)** variable kappa (IGKV) and **(C)** variable lambda (IGLV) genes. Bars depict percentage of gene usage of all expressed mAbs within each group.

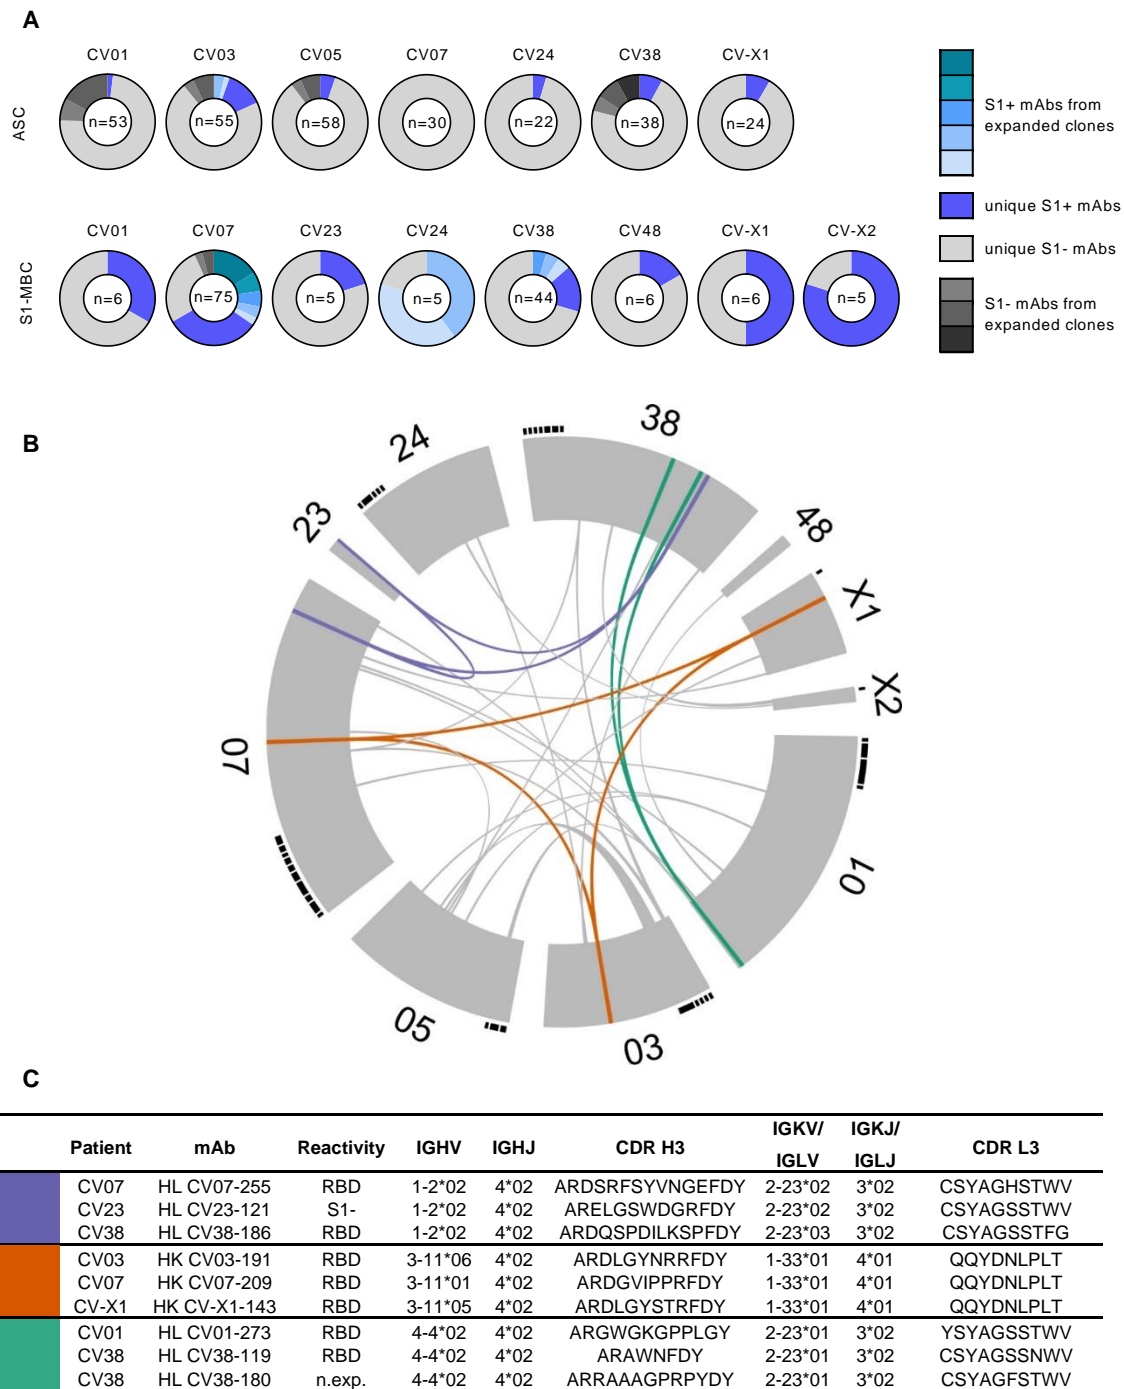

**Fig. S4 | Clonal expansion and public clonotypes.**

(A) Pie charts represent clonal relationship of all expressed mAbs from each donor separately for antibody secreting cells (ASC) and S1-stained memory B cells (S1-MBC). mAbs were considered S1-reactive (S1+) or non-S1-reactive (S1-) based on SARS-CoV-2-S1 ELISA measurements. Antibodies were considered to be clonally expanded when they were isolated from multiple cells. (B) Circos plot displays all isolated mAbs from ten donors. Interconnecting lines indicate relationship between mAbs that share the same V and J gene on both Ig heavy and light chain. Such public or shared clonotypes in which more than 50% of mAbs are S1-reactive are represented as colored lines. Small black angles at the outer circle border indicate expanded clones within the respective donor. (C) Properties of public clonotypes from

S1+ mAbs according to the colors used in (B) with sequence similarities between mAbs isolated from different donors, also within complementarity-determining region (CDR) three. IGHV, IGHJ IGKV, IGKJ, IGLV, IGLJ = V and J genes of immunoglobulin heavy, kappa, lambda chains; n.exp. = not expressed.

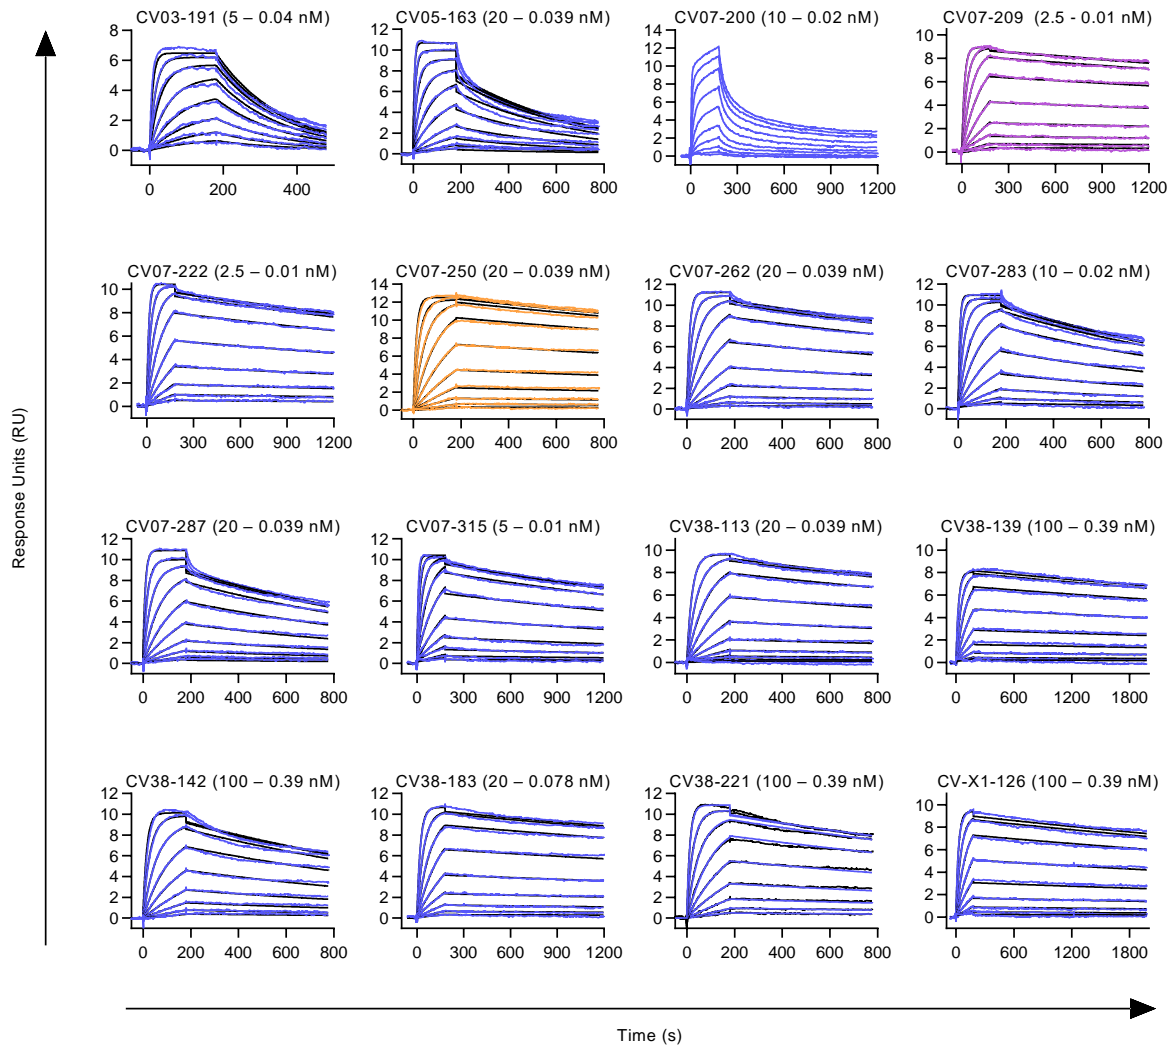

**Fig. S5 | Binding kinetic measurements of mAbs to RBD.**

Binding kinetics of mAbs to RBD were modeled (black) from multi-cycle surface plasmon resonance (SPR) measurements (blue, purple, orange). Fitted monovalent analyte model is shown. For CV07-200, neither a bivalent nor a monovalent analyte model described the data accurately (no model is shown). Three out of the 18 selected mAbs for detailed characterization (Top-18) were not analyzed using multi-cycle-kinetics: CV07-270 was excluded as it interacted with the anti-mouse IgG reference surface on initial qualitative measurements. CV07-255 and CV-X2-106 were not analyzed since they showed biphasic binding kinetics and relatively fast dissociation rates in initial qualitative measurements. Non-neutralizing CV03-191, a mAb not included in the Top-18 mAbs, was included in the multicycle experiments as it has the same clonotype as strongly neutralizing CV07-209 (Fig. S4C). All measurements are performed by using a serial 2-fold dilution of mAbs on reversibly immobilized SARS-CoV-2-S1 RBD-mFc.



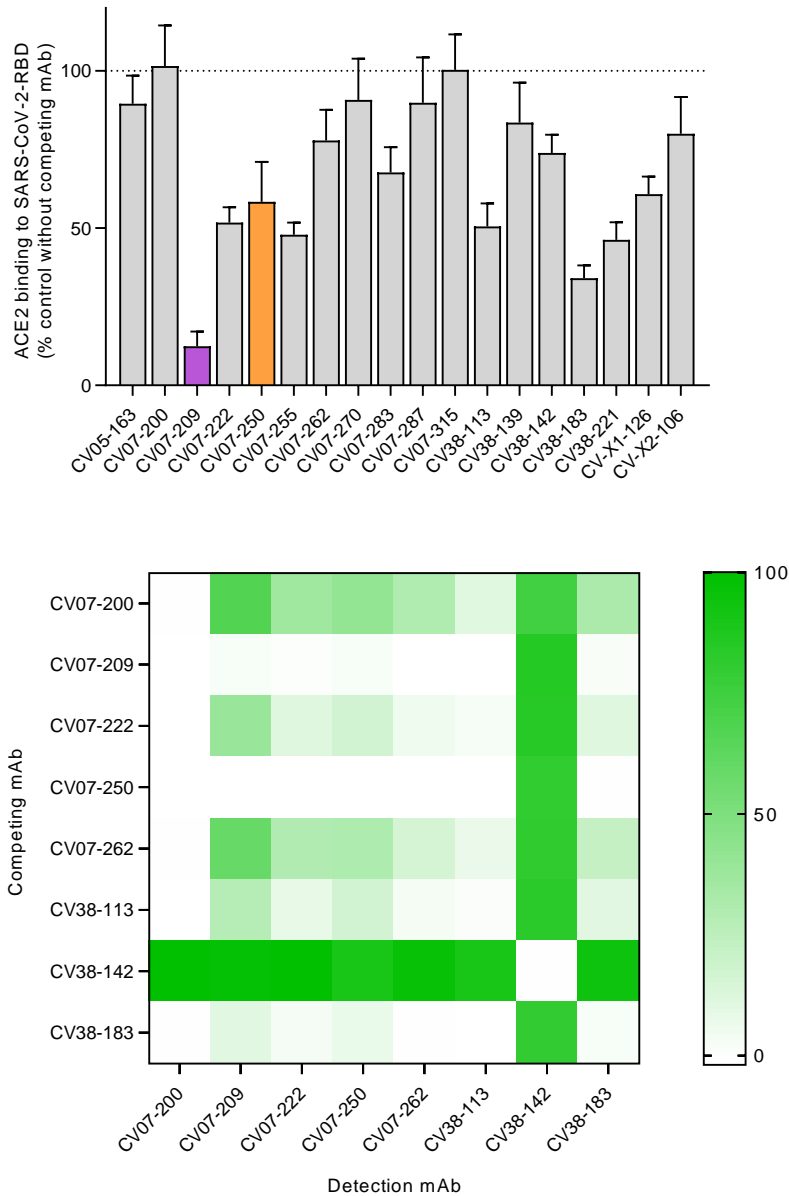

**Fig. S6 | Competition of mAbs for RBD binding with ACE2 and between SARS-CoV-2 mAbs.**

(A) ELISA-based measurements of human ACE2 binding to SARS-CoV-2 RBD after pre-incubation with the indicated neutralizing mAbs. Values are shown relative to antibody-free condition as mean+SD from three independent measurements. (B) Competition for RBD binding between combinations of potent neutralizing mAbs is illustrated as a heat map. Shades of green indicate the degree of competition for RBD binding of detection mAb in presence of 100-fold excess of competing mAb relative to non-competition conditions. Green squares indicate no competition. Values are shown as mean of two independent experiments.

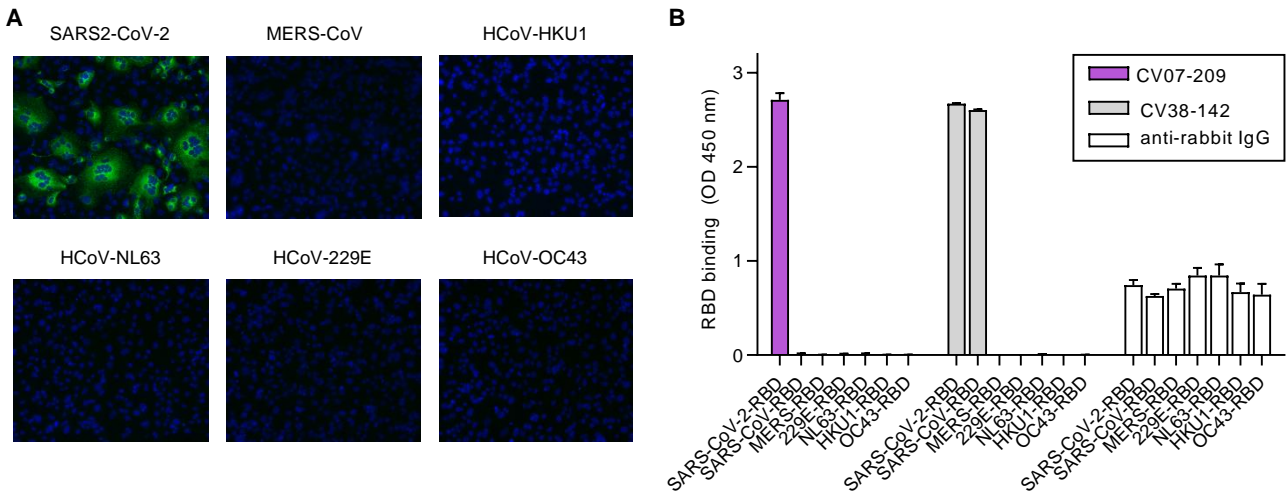

**Fig. S7 | Binding specificity of mAbs within coronaviruses.**

(A) Representative immunofluorescence staining on VeroB4 cells overexpressing spike protein of indicated coronavirus with SARS-CoV-2 mAb CV07-209 at 5  $\mu$ g/ml. For all other 17 of the selected 18 mAbs (Top-18, Supplementary Table ST4), similar results were obtained. (B) Binding of indicated mAbs to fusion proteins containing the RBD of indicated coronaviruses and the constant region of rabbit IgG revealed by ELISA. For all other Top-18 mAbs, similar results were obtained as for CV07-209. Values indicate mean+SD from two wells of one experiment.

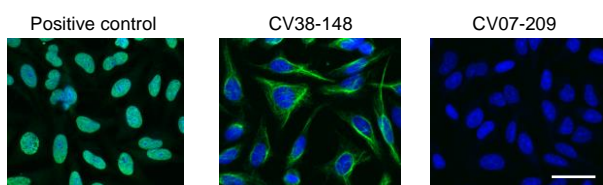

**Fig. S8 | Representative staining on HEp-2 cells of selected S1-reactive antibodies.**

Representative HEp-2 cell staining with a commercial anti-nuclear antibody as positive control revealed nuclear binding (left). S1-reactive non-neutralizing mAb CV38-148 exhibited cytoplasmic binding (middle). Neutralizing mAb CV07-209 showed no binding (right). All mAbs selected for detailed characterization (Top-18, Supplementary Table ST4) revealed similar results like CV07-209 when used at 50  $\mu$ g/ml.

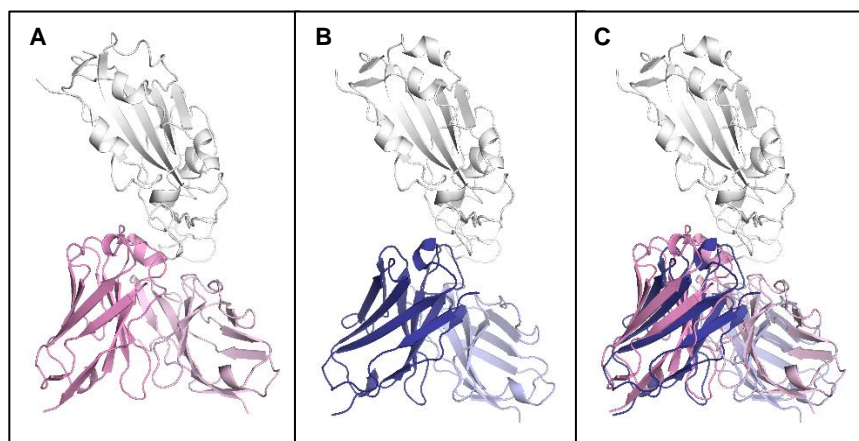

**Fig. S9 | Structural comparison of CV07-270/RBD and P2B-2F6/RBD complexes.**

(A) Structure of CV07-270 (pink) in complex with RBD (white). (B) Structure of P2B-2F6 (blue) in complex with RBD (white) (PDB 7BWJ)

(Ju et al., 2020) (C) Structures of CV07-270/RBD and P2B-2F6/RBD were superimposed based on the RBD.

A

```

                                CDRH1                                CDRH2
CV07-250: QVQLVQSEAEVKEPGASVEVSCKASGYNFTNFAISWVRQAPGQGLEWMGWISGYNGDTNSAQKFL
IGHV1-18: QVQLVQSGAEVKKPGASVKVSCKASGYTFTSYGISWVRQAPGQGLEWMGWISAYNGNTNYAQKLQ
                                31 32 33 34 35                                50 51 52 53 54 55 56 57 58 59 60 61 62 63 64

                                CDRH2                                CDRH3
CV07-250: GRVTMTTDTSTTTAYMELRSLRSDDTAVYYCAGSDNYGFPYNGMDVWGQGTVSS
IGHV1-18: GRVTMTTDTSTTSTAYMELRSLRSDDTAVYYCA-----
                                95 96 97 98 99 100 100A 100B 100C 100D 100E 101 102

                                CDRH1                                CDRH2
CV07-250: QSALTQPPSASGSPGQSVTISCTGTSSDLGAYHEFTWYQHYPGKAPKVMIYGVRKRPSGVPDRFS
IGHV2-8:  QSALTQPPSASGSPGQSVTISCTGTSSDVGGYNYVSWYQQHPGKAPKLMIYEVSKRPSGVPDRFS
                                24 25 26 27 27A 27B 27C 28 29 30 31 32 33 34                                50 51 52 53 54 55 56

                                CDRH3
CV07-250: GSKSGNTASLTVSGLQDEDEADYYCSSYAGNDFVFGGGTKLTVL
IGHV2-8:  GSKSGNTASLTVSGLQAEDEADYYCSSYAGSNN-----
                                89 90 91 92 93 94 95 95A 96 97

```

B

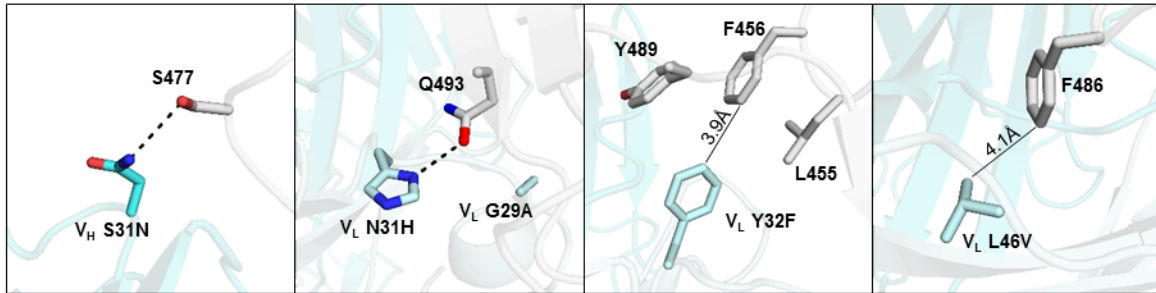

C

```

                                CDRH1                                CDRH2
CV07-270: QVQLVESGGGLVKPGGSLRLSCAASGFTFSDYYMTWIRQAPGKGLEWVSYISSSGSTIYYADSVKG
IGHV3-11: QVQLVESGGGLVKPGGSLRLSCAASGFTFSDYYMSWIRQAPGKGLEWVSYISSSGSTIYYADSVKG
                                31 32 33 34 35                                50 51 52 53 54 55 56 57 58 59 60 61 62 63 64 65

                                CDRH3
CV07-270: RFTISRDNAKNSLYLQMNSLRAEDTAVYYCARARGSSGWYRIGTRWGNWFDPWGQGTLTVSS
IGHV3-11: RFTISRDNAKNSLYLQMNSLRAEDTAVYYCAR-----
                                95 96 97 98 99 100 100A 100B 100C 100D 100E 100F 100G 100H 100I 100J 100K 100L 101 102

                                CDRH1                                CDRH2
CV07-270: QSALTQPASVSGSPGQSITISCTGTSSDVGGYNYVSWYQQHPGKAPKLMIYEVSNRPSGVSNRFS
IGHV2-14: QSALTQPASVSGSPGQSITISCTGTSSDVGGYNYVSWYQQHPGKAPKLMIYEVSNRPSGVSNRFS
                                24 25 26 27 27A 27B 27C 28 29 30 31 32 33 34                                50 51 52 53 54 55 56

                                CDRH3
CV07-270: GSKSGNTASLTISGLQAEDEADYYCSSYTSSSNVFGGGTMLTVL
IGHV2-14: GSKSGNTASLTISGLQAEDEADYYCSSYTSSS-----
                                89 90 91 92 93 94 95 95A 96 97

```

**Fig. S10 | Comparison of sequences of CV07-250 and CV07-270 to their putative germline sequences.**

- (A) Alignment of CV07-250 with the germline IGHV1-18 sequence (nucleotide SHM rate 5.8%) and IGLV2-8 (nucleotide SHM rate 5.4%).  
 (B) Somatic mutations VH S31H, VL G29A, VL N31H, VL Y32F, VL S34T, and VL L46V are located in the CV07-250 paratope with other

somatic mutations in all of the CDRs that may affect overall CDR conformation and interactions. Hydrogen bonds are represented by dashed lines. Distances between atoms are shown in solid lines. CV07-250 heavy chain is in dark cyan and light chain is in light cyan. SARS-CoV-2 RBD is in light grey. **(C)** Alignment of CV07-270 with the germline IGHV3-11 sequence (nucleotide SHM rate 0.7%) and IGLV2-14 (nucleotide SHM rate 0%). The regions that correspond to CDR H1, H2, H3, L1, L2, and L3 are indicated. Residues that differ from the germline are highlighted in red. Residues that interact with the RBD are highlighted in yellow. Residue positions in the CDRs are labeled according to the Kabat numbering scheme.

**Supplementary Table ST1 | Description of patient cohort.**

| General         | Patient ID<br>(gender, age)            | CV01<br>(m, 21)                | CV03<br>(m, 46)                             | CV05<br>(m, 61)                       | CV07<br>(m, 32)                            | CV23<br>(f, 44)                  | CV24<br>(m, 64)               | CV38<br>(m, 70)                                    | CV48<br>(m, 48)                 | CV-X1<br>(m, 46)                                     | CV-X2<br>(m, 57)        |       |
|-----------------|----------------------------------------|--------------------------------|---------------------------------------------|---------------------------------------|--------------------------------------------|----------------------------------|-------------------------------|----------------------------------------------------|---------------------------------|------------------------------------------------------|-------------------------|-------|
| Patient history | Pre-existing conditions                | N                              | CVD, Crohn's disease                        | N                                     | N                                          | atopic dermatitis, hypothyreosis | CVD                           | CVD                                                | N                               | N                                                    | N                       |       |
|                 | Smoking                                | N                              | N                                           | N                                     | Y                                          | N                                | N                             | Y (10 PY)                                          | N                               | Y (7 PY)                                             | N                       |       |
| Symptoms        | Pulmonary and general symptoms         | fever, cough, emesis           | fever, cough, dyspnea, emesis               | fever, cough, dyspnea, superinfection | fever, cough, dyspnea, respiratory failure | fever                            | fever, cough, dyspnea, emesis | fever, dyspnea, renal failure, atrial fibrillation | fever, cough, dyspnea, diarrhea | fever, cough, dyspnea, respiratory failure, diarrhea | fever, cough, epistaxis |       |
|                 | Neurological symptoms                  | loss of smell, muscle twitches | loss of smell, mood impairment, paresthesia | N                                     | loss of smell                              | n/a                              | loss of smell                 | N                                                  | N                               | n/a                                                  | loss of smell           |       |
| Disease course  | Date symptom onset                     | 17.02.2020                     | 29.02.2020                                  | 27.02.2020                            | 08.03.2020                                 | 20.03.2020                       | 13.03.2020                    | 12.03.2020                                         | 14.03.2020                      | 15.03.2020                                           | 18.03.2020              |       |
|                 | Days until diagnosis / hospitalization | 13 / 13                        | 10 / 11                                     | 3 / 13                                | 5 / 6                                      | 0 / 0                            | 7 / 8                         | 6 / 14                                             | 10 / 9                          | 11 / 12                                              | 2 / -                   |       |
|                 | SARS-CoV-2 serum IgG at PBMC isolation | 2.0 / 3.8                      | 6.4                                         | 5.7                                   | 6.6                                        | 1.2                              | n/a                           | 8.9                                                | 6.4                             | n/a                                                  | n/a                     |       |
|                 | Days in hospital / on ICU              | 34 / 0                         | 14 / 0                                      | 9 / 0                                 | 15 / 2                                     | 34 / 0                           | 8 / 2                         | 15 / 0                                             | 17 / 2                          | 15 / 6                                               | 0 / 0                   |       |
|                 | Oxygen demand / days ventilation       | N / 0                          | N / 0                                       | N / 0                                 | Y / 0                                      | N / 0                            | Y / 0                         | Y / 0                                              | Y / 0                           | Y / 0                                                | Y / 3                   | N / 0 |
|                 | Medication                             | N                              | N                                           | AB, ACT                               | N                                          | N                                | AB, ACT                       | AB, ACT, APT, Digitoxin                            | AB, ACT, APT, HCQ               | AB, HCQ                                              | N                       |       |
| Follow Up       | Outcome                                | discharged                     | discharged                                  | discharged                            | discharged                                 | discharged                       | discharged                    | discharged                                         | discharged                      | discharged                                           | discharged              |       |

PBMCs from ten COVID-19 patients were included in immunoglobulin repertoire studies. General information, patients' history, symptoms of SARS-CoV-2 infection, disease course and outcome are listed for each donor. SARS-CoV-2 IgG is given as a ratio of optical density from time point of PBMC isolation ( $\pm$  one day).

Abbreviations: m = male, f = female, Y = yes, N = no, n/a = not available, CVD = cardiovascular disease, PY = pack years, AB = antibiotics, ACT = anticoagulation therapy, APT = antiplatelet therapy, HCQ = hydroxychloroquine.

**Supplementary Table ST2 | Immunoglobulin sequence and functional screening data of all isolated mAbs.**

| mAb         | Clonality | Source cell | Ig isotype | IGHV gene | IGHJ gene | CDR H3                   | SHM IGHV | IGKV/IGLV gene | IGKJ/IGLJ gene | CDR L3       | SHM IGKV/IGLV | S1 reactivity (OD ratio) | RBD reactivity | Estimated IC <sub>50</sub> (ng/ml) |
|-------------|-----------|-------------|------------|-----------|-----------|--------------------------|----------|----------------|----------------|--------------|---------------|--------------------------|----------------|------------------------------------|
| HL CV01-101 |           | ASC         | IgM        | 3-74      | 3         | ARGSSNLFDI               | 7        | 1-44           | 3              | AAWDDSLNGWV  | 4             | 0.1                      |                |                                    |
| HL CV01-102 |           | ASC         | IgG1       | 3-21      | 4         | ARSGGYSGYDYSHRIDY        | 25       | 2-14           | 3              | SSYTLDDSTVV  | 12            | n.exp.                   |                |                                    |
| HK CV01-103 |           | ASC         | IgA1       | 1-69      | 4         | ASGWGMEYSSSSADY          | 0        | 3-11           | 2              | QQRSNWPPYT   | 1             | 0.09                     |                |                                    |
| HL CV01-104 | 1-2       | ASC         | IgM        | 1-18      | 4         | ARADETMVQGVIPNFDY        | 4        | 2-8            | 2              | SSYAGSNNVV   | 3             | 0.1                      |                |                                    |
| HK CV01-107 |           | ASC         | IgA2       | 3-74      | 6         | ARGRDCGSSCYGYPYGMVDV     | 7        | 2-28           | 2              | MQUALHTPYT   | 4             | n.exp.                   |                |                                    |
| HK CV01-109 | 1-3       | ASC         | IgG2       | 3-7       | 4         | ARAGSVGVVDY              | 12       | 2-30           | 1              | MQGTHWPWT    | 8             | 0.1                      |                |                                    |
| HK CV01-110 |           | ASC         | IgA1       | 3-7       | 4         | VRDRGYCVGDVICYTVLDY      | 27       | 1-6            | 4              | LHDYNYPT     | 13            | 0.09                     |                |                                    |
| HK CV01-111 |           | ASC         | IgM        | 3-15      | 1         | TTWFYDIRDH               | 24       | 3-11           | 2              | QQRSNWPPFT   | 11            | 0.09                     |                |                                    |
| HL CV01-112 | 1-2       | ASC         | IgM        | 1-18      | 4         | ARADDTMVQGVIPNFDY        | 14       | 2-8            | 3              | SSYAGSNNVV   | 2             | 0.03                     |                |                                    |
| HK CV01-113 |           | ASC         | IgM        | 3-15      | 4         | ASIYYDF                  | 13       | 1-17           | 2              | LHYSVVPYT    | 18            | n.exp.                   |                |                                    |
| HL CV01-114 |           | ASC         | IgM        | 1-2       | 4         | ARGDAVARTLNLDY           | 8        | 1-44           | 2              | AAWDDSLNGV   | 3             | 0.09                     |                |                                    |
| HK CV01-116 | 1-3       | ASC         | IgM        | 3-7       | 4         | ARAGNIGAVDY              | 14       | 2-30           | 1              | MQGTHWPWT    | 1             | 0.02                     |                |                                    |
| HL CV01-117 |           | ASC         | IgA1       | 3-49      | 4         | GLSYYYDNGGYYVPPIDV       | 20       | 2-8            | 3              | SSYADSNLV    | 9             | n.exp.                   |                |                                    |
| HK CV01-118 | 1-1       | ASC         | IgM        | 3-9       | 3         | AKNSPCADAVCYFDV          | 10       | 4-1            | 1              | QQYYSAPRT    | 8             | n.exp.                   |                |                                    |
| HK CV01-120 |           | ASC         | IgA1       | 4-30-4    | 3         | AREGLITIFGVARDAFDI       | 1        | 3-20           | 2              | QQYGSSPRT    | 1             | 0.09                     |                |                                    |
| HK CV01-121 |           | ASC         | IgA1       | 4-38-2    | 4         | SIWGGVQGVLDY             | 22       | 3-15           | 2              | QQYNDWPRT    | 7             | 0.09                     |                |                                    |
| HK CV01-122 | 1-3       | ASC         | IgG2       | 3-7       | 4         | ARAGSIASVDY              | 11       | 2-30           | 1              | MQGTHWPWT    | 8             | n.exp.                   |                |                                    |
| HK CV01-123 |           | ASC         | IgM        | 3-7       | 4         | AKGGWRYFDY               | 16       | 3-11           | 4              | QQRSSWPLT    | 9             | 0.08                     |                |                                    |
| HK CV01-124 |           | ASC         | IgM        | 3-23      | 4         | AKYGSITIFGVIIIGYFYFDY    | 1        | 3-20           | 2              | QQYGSSPAT    | 0             | 0.08                     |                |                                    |
| HL CV01-125 | 1-2       | ASC         | IgA1       | 1-18      | 4         | ARADYTMVQGVIPNFDY        | 7        | 2-8            | 2              | SSYAGSNNVL   | 10            | 0.1                      |                |                                    |
| HL CV01-126 |           | ASC         | IgA2       | 5-51      | 6         | AGHVRYCISTNCYHYGMDV      | 5        | 5-45           | 3              | MIWHTSAWV    | 6             | 0.10                     |                |                                    |
| HK CV01-128 | 1-3       | ASC         | IgG2       | 3-7       | 4         | ARAGDRGAVDY              | 13       | 2-30           | 1              | MQGTHWPWT    | 8             | 0.11                     |                |                                    |
| HL CV01-129 | 1-2       | ASC         | IgA1       | 1-18      | 4         | ARADYTMVQGVIPNFDY        | 0        | 2-8            | 2              | SSYAGSNNVV   | 4             | n.exp.                   |                |                                    |
| HK CV01-130 |           | ASC         | IgM        | 3-7       | 3         | ARPGYSGNNWGEAFDI         | 0        | 4-1            | 1              | QQYYDTLWT    | 13            | 0.09                     |                |                                    |
| HK CV01-132 |           | ASC         | IgG1       | 4-59      | 6         | ARDRGYNWNYYYYYGMDV       | 0        | 3-20           | 1              | QQYGSSPST    | 2             | 0.1                      |                |                                    |
| HK CV01-133 | 1-3       | ASC         | IgG2       | 3-7       | 4         | ARAGSRGSVDY              | 21       | 2-30           | 1              | MQGTHWPWT    | 13            | 0.1                      |                |                                    |
| HK CV01-134 |           | ASC         | IgM        | 3-30      | 6         | AKEKLDCSSTSCYFGFIYYYYMDV | 0        | 1-12           | 2              | QQANSFPLT    | 1             | 0.09                     |                |                                    |
| HL CV01-135 |           | ASC         | IgG1       | 3-11      | 4         | ARESYEGSSFDY             | 10       | 6-57           | 3              | QSYDSSNRRV   | 3             | 0.1                      |                |                                    |
| HK CV01-137 |           | ASC         | IgG2       | 3-7       | 4         | ARDYGRCGDY               | 18       | 3-11           | 2              | QQGGNWPRPT   | 9             | 0.11                     |                |                                    |
| HK CV01-138 |           | ASC         | IgA1       | 4-39      | 5         | ARHGYYITIFGVIIIPGWFDP    | 0        | 3-15           | 1              | QQYNNWPPWT   | 2             | 0.07                     |                |                                    |
| HL CV01-139 |           | ASC         | IgM        | 4-39      | 4         | ARHPDNELLPFDY            | 0        | 3-21           | 1              | QVWDDSSSDSYV | 2             | 0.11                     |                |                                    |
| HK CV01-140 |           | ASC         | IgM        | 3-30-3    | 2         | ARDPRNYCHSNTCPVWYFDL     | 17       | 3-20           | 2              | QQYGSSPRT    | 6             | 0.08                     |                |                                    |
| HL CV01-141 |           | ASC         | IgG1       | 3-33      | 4         | AREGNYGDYGGSFYD          | 0        | 3-10           | 3              | YSTDSSGNHRV  | 0             | n.exp.                   |                |                                    |
| HL CV01-142 |           | ASC         | IgM        | 4-30-4    | 2         | ARGPRITIFGVVIYWFYDL      | 0        | 1-40           | 2              | QSYDSSLGSGV  | 1             | 0.09                     |                |                                    |
| HL CV01-144 |           | ASC         | IgG1       | 3-30      | 4         | ARRDRIFEFGATREALDF       | 22       | 1-40           | 1              | QSYDSSLGYSV  | 15            | 0.08                     |                |                                    |
| HK CV01-145 |           | ASC         | IgM        | 3-23      | 5         | AKVTWTTTGDS              | 19       | 1-5            | 1              | QQYNSYPWT    | 7             | 0.10                     |                |                                    |
| HK CV01-146 | 1-3       | ASC         | IgG1       | 3-7       | 4         | ARAGDRGAVDY              | 17       | 2-30           | 1              | MQGTQWPWT    | 10            | 0.09                     |                |                                    |
| HK CV01-147 |           | ASC         | IgG1       | 3-30-3    | 5         | ARERVNGRWLQLLTP          | 20       | 1-5            | 4              | QQYDAYLS     | 16            | 0.09                     |                |                                    |
| HK CV01-148 | 1-3       | ASC         | IgM        | 3-7       | 4         | ARAGDRGAVDY              | 10       | 2-30           | 1              | MQGTHWPWT    | 2             | 0.08                     |                |                                    |
| HK CV01-149 |           | ASC         | IgM        | 1-18      | 4         | AGYPRYNWYDNRYYFDF        | 7        | 1-39           | 5              | QQSYSAPIT    | 9             | n.exp.                   |                |                                    |
| HL CV01-151 | 1-2       | ASC         | IgM        | 1-18      | 4         | ARADDTMVQGVIPNFDY        | 2        | 2-8            | 2              | SSYAGSNNVV   | 4             | 0.07                     |                |                                    |
| HK CV01-152 |           | ASC         | IgA1       | 1-3       | 6         | ARGVGATIPYYYYYMDV        | 2        | 1-5            | 1              | QQYNSYSWT    | 1             | 0.1                      |                |                                    |
| HK CV01-153 |           | ASC         | IgG1       | 4-4       | 6         | AKVGGGNADHGPYYYYYMDV     | 37       | 1-9            | 2              | QELNRYPRPT   | 17            | 0.07                     |                |                                    |
| HK CV01-154 | 1-1       | ASC         | IgM        | 3-9       | 3         | AKNSASCADDLCYFDI         | 15       | 4-1            | 1              | QQYYSGPRT    | 7             | 0.08                     |                |                                    |
| HK CV01-155 |           | ASC         | IgM        | 3-11      | 4         | ARALPGGITIFGVVITEYFYD    | 0        | 3-20           | 2              | QQYGSSSYT    | 2             | 0.08                     |                |                                    |
| HL CV01-158 |           | ASC         | IgG2       | 3-21      | 3         | ARGDDYGEYTGAFDA          | 2        | 3-1            | 2              | QAWDSSTVV    | 3             | 0.09                     |                |                                    |
| HK CV01-159 |           | ASC         | IgA1       | 1-46      | 4         | ARGGETQQLRVWDQKTDD       | 23       | 1-17           | 4              | LQYNSYPLT    | 12            | 0.11                     |                |                                    |



| mAb         | Clonality | Source cell | Ig isotype | IGHV gene | IGHJ gene | CDR H3                         | SHM IGHV | IGKV/IGLV gene | IGKJ/IGLJ gene | CDR L3      | SHM IGKV/IGLV | S1 reactivity (OD ratio) | RBD reactivity | Estimated IC <sub>50</sub> (ng/ml) |
|-------------|-----------|-------------|------------|-----------|-----------|--------------------------------|----------|----------------|----------------|-------------|---------------|--------------------------|----------------|------------------------------------|
| HK CV01-163 | 1-3       | ASC         | IgA1       | 3-7       | 4         | ARAGSVGTVDY                    | 22       | 2-30           | 1              | MQGTHWPWT   | 16            | 0.08                     |                |                                    |
| HK CV01-166 |           | ASC         | IgA1       | 3-15      | 4         | TTEKGRYHLGGVFAN                | 11       | 4-1            | 4              | QQYYSTPLT   | 8             | n.exp.                   |                |                                    |
| HL CV01-168 |           | ASC         | IgA1       | 5-51      | 4         | VWTSRGYFDH                     | 6        | 7-43           | 3              | LFYYGGAWV   | 9             | n.exp.                   |                |                                    |
| HL CV01-169 |           | ASC         | IgM        | 3-30      | 4         | ARDLSSGWSLDS                   | 3        | 2-14           | 3              | SSYTSSNTWV  | 4             | 0.07                     |                |                                    |
| HL CV01-170 |           | ASC         | IgM        | 4-4       | 6         | ARYCSSTSCYGYYYGMDV             | 0        | 2-8            | 1              | SSYAGSISYV  | 2             | 0.08                     |                |                                    |
| HK CV01-171 |           | ASC         | IgG1       | 4-4       | 3         | AKGGGSGWYYDAFDI                | 17       | 3-15           | 1              | QQYNNWLR    | 12            | 0.11                     |                |                                    |
| HL CV01-174 |           | ASC         | IgM        | 1-18      | 4         | ARDWVNYARGNFYD                 | 3        | 2-14           | 2              | SSYTSSSSV   | 1             | 0.14                     |                |                                    |
| HK CV01-175 | 1-3       | ASC         | IgM        | 3-7       | 4         | ARAGGVGTVDY                    | 11       | 2-30           | 1              | MQGLWPWT    | 2             | 0.1                      |                |                                    |
| HL CV01-176 | 1-2       | ASC         | IgA1       | 1-18      | 4         | ARADHTMVQGVIPNFYD              | 3        | 2-8            | 2              | SSYTGRKNV   | 6             | 0.1                      |                |                                    |
| HK CV01-180 | 1-3       | ASC         | IgM        | 3-7       | 4         | ARCDMAGTTDY                    | 5        | 2-30           | 1              | MQGLWPWT    | 2             | 0.1                      |                |                                    |
| HK CV01-181 |           | ASC         | IgG1       | 3-21      | 2         | ARDLEGVETIFGVVIIIPAYWYFDL      | 0        | 2-28           | 4              | MQALQTRLT   | 3             | 0.08                     |                |                                    |
| HL CV01-182 |           | ASC         | IgG1       | 3-23      | 4         | AKDLKIGTLGWYYDFWSGYLPDPSNKIFDY | 0        | 1-40           | 3              | QSYDSSLSGWV | 0             | 0.1                      |                |                                    |
| HL CV01-183 |           | ASC         | IgM        | 3-73      | 3         | TRVNIQGFYDALDI                 | 6        | 1-51           | 2              | GTWSSLSVVV  | 7             | 0.11                     |                |                                    |
| HK CV01-184 |           | ASC         | IgG2       | 4-59      | 4         | ARFSSAAGVWALDH                 | 11       | 4-1            | 2              | QQYITPFT    | 7             | n.exp.                   |                |                                    |
| HL CV01-185 |           | ASC         | IgA1       | 1-69      | 6         | ACDMVQGVAVLDV                  | 13       | 2-14           | 2              | SSYTSSSTV   | 9             | 0.13                     |                |                                    |
| HK CV01-186 |           | ASC         | IgG2       | 4-59      | 5         | ARHGKSIPYSNYDWFDP              | 0        | 1-39           | 3              | QSYSTLPFT   | 0             | 0.09                     |                |                                    |
| HK CV01-188 |           | ASC         | IgM        | 3-72      | 4         | ARDLGANGDRFGN                  | 4        | 4-1            | 1              | QQYYSTPLT   | 2             | 0.08                     |                |                                    |
| HK CV01-193 |           | ASC         | IgA1       | 3-15      | 4         | ATDLGDYGYDMRS                  | 13       | 1-12           | 2              | QQANSFPYT   | 7             | 0.11                     |                |                                    |
| HL CV01-194 |           | ASC         | IgM        | 4-59      | 4         | AKKADPHSAFDY                   | 6        | 2-11           | 1              | CSYAGSYTYV  | 6             | 0.09                     |                |                                    |
| HL CV01-195 |           | ASC         | IgM        | 3-7       | 1         | VRELVVGRAEYFQD                 | 0        | 1-44           | 2              | AAWDDSLNGRV | 1             | 3.37                     | ++             | >250                               |
| HK CV01-196 |           | ASC         | IgG1       | 3-30      | 3         | AKDPGMLYPSAFDM                 | 14       | 3-15           | 4              | QQYNNWPLT   | 13            | n.exp.                   |                |                                    |
| HL CV01-197 |           | ASC         | IgM        | 3-23      | 4         | AKDQDGHYGGNPDMDH               | 10       | 2-8            | 3              | SSYAGSNKMV  | 11            | n.exp.                   |                |                                    |
| HL CV01-198 |           | ASC         | IgG2       | 3-15      | 4         | ATLTYGYSY                      | 11       | 2-14           | 1              | SSYTSSSTTYV | 63            | n.exp.                   |                |                                    |
| HK CV01-199 |           | ASC         | IgA1       | 3-74      | 4         | ASNFNRRNDGY                    | 14       | 2-30           | 4              | IQSTHWPPN   | 13            | n.exp.                   |                |                                    |
| HK CV01-202 |           | ASC         | IgG1       | 4-30-4    | 4         | ARMGNMFGYSVVDV                 | 22       | 1-39           | 2              | LQYSAPYT    | 20            | n.exp.                   |                |                                    |
| HL CV01-203 |           | ASC         | IgA2       | 3-30      | 6         | AKSEGFYFYGVVDV                 | 9        | 1-47           | 1              | AACDDSLSGHV | 3             | n.exp.                   |                |                                    |
| HK CV01-205 |           | ASC         | IgG1       | 5-51      | 5         | AREARWSFSPWFDP                 | 6        | 3-15           | 2              | QQYNNWPRF   | 7             | n.exp.                   |                |                                    |
| HK CV01-211 |           | ASC         | IgA1       | 5-51      | 4         | ARLSSGWYGGFNFDY                | 0        | 3-20           | 2              | QQYGSSPVYT  | 0             | n.exp.                   |                |                                    |
| HL CV01-212 |           | ASC         | IgM        | 3-30      | 4         | AKCSYTSICKGWDAHA               | 14       | 2-14           | 2              | SSFTTSYTLV  | 11            | n.exp.                   |                |                                    |
| HK CV01-213 |           | ASC         | IgG1       | 3-64      | 4         | ARLQGTGYLDY                    | 12       | 3-20           | 2              | HSYSSSPRT   | 9             | n.exp.                   |                |                                    |
| HL CV01-215 |           | ASC         | IgM        | 3-48      | 5         | ARQWAVNWVFP                    | 7        | 2-14           | 2              | SSHTSSSTV   | 8             | n.exp.                   |                |                                    |
| HK CV01-220 |           | ASC         | IgA1       | 3-48      | 6         | ARDVGYTESTSTGMDV               | 7        | 3-11           | 5              | QQRGNWPPAT  | 11            | n.exp.                   |                |                                    |
| HL CV01-221 |           | ASC         | IgA1       | 3-30-3    | 4         | ARGAPVDY                       | 6        | 2-8            | 7              | N/A         | 9             | n.exp.                   |                |                                    |
| HL CV01-222 |           | ASC         | IgA1       | 3-23      | 4         | AKPGGEWYSSGWRFDY               | 2        | 1-47           | 2              | AAWDDSLSGPV | 0             | n.exp.                   |                |                                    |
| HL CV01-223 |           | ASC         | IgM        | 3-23      | 3         | AKCGRTSCRVDAFDI                | 27       | 8-61           | 3              | VLSMGGGVV   | 13            | n.exp.                   |                |                                    |
| HL CV01-225 |           | ASC         | IgA1       | 3-53      | 3         | ARDGGGSYPHRAFDI                | 1        | 2-14           | 2              | SSYTSSSTSDV | 2             | n.exp.                   |                |                                    |
| HL CV01-226 |           | ASC         | IgG1       | 4-39      | 6         | ARHATGTPPYYYYMDV               | 2        | 3-1            | 1              | QAWDSSTACV  | 3             | n.exp.                   |                |                                    |
| HL CV01-227 |           | ASC         | IgA1       | 3-30      | 4         | AKGSPLLFGGVVDY                 | 0        | 5-39           | 3              | AIWYSSSLV   | 1             | n.exp.                   |                |                                    |
| HK CV01-228 |           | ASC         | IgA1       | 3-7       | 4         | ARVGSADYDYVWGTRTLDS            | 11       | 4-1            | 1              | QQCLTTPWT   | 12            | n.exp.                   |                |                                    |
| HK CV01-229 |           | ASC         | IgG2       | 5-51      | 4         | ARPYGAGTAHYFDY                 | 9        | 4-1            | 4              | QQYGTPT     | 8             | n.exp.                   |                |                                    |
| HL CV01-231 | 1-4       | ASC         | IgA1       | 4-39      | 6         | ARHFHPGNYYYYYMDV               | 6        | 3-1            | 2              | QAWDSSTYV   | 3             | n.exp.                   |                |                                    |
| HL CV01-232 |           | ASC         | IgM        | 4-39      | 4         | ARKYGDHLFDY                    | 1        | 8-61           | 3              | VLYMGSGISV  | 3             | n.exp.                   |                |                                    |
| HL CV01-233 |           | ASC         | IgM        | 4-39      | 3         | ARSDARFLEWLFDPDAFDI            | 3        | 2-23           | 2              | CSYAGSTTFV  | 3             | n.exp.                   |                |                                    |
| HL CV01-234 |           | ASC         | IgM        | 3-30      | 5         | ARGSPFGGIRSGLGP                | 20       | 1-27           | 1              | QKYNAPWT    | 11            | n.exp.                   |                |                                    |
| HL CV01-238 | 1-4       | ASC         | IgG1       | 4-39      | 6         | ARHPTGSGSYQYYYYIDV             | 3        | 3-1            | 2              | QAWDSSTV    | 2             | n.exp.                   |                |                                    |
| HL CV01-241 |           | ASC         | IgA1       | 3-66      | 3         | ARDRGYDSSGYTAADAFDI            | 2        | 1-5            | 1              | QQYNSYST    | 6             | n.exp.                   |                |                                    |
| HL CV01-242 |           | ASC         | IgG1       | 4-31      | 5         | ARGGYRNWFPD                    | 3        | 2-11           | 3              | CSYAGSYTW   | 2             | n.exp.                   |                |                                    |
| HK CV01-244 |           | S1-MBC      | IgG1       | 5-10-1    | 6         | ARLKGSPVPPYYNYMDV              | 18       | 2-28           | 4              | MQLQTPFI    | 7             | n.exp.                   |                |                                    |
| HK CV01-249 |           | S1-MBC      | IgA1       | 3-30-3    | 3         | ARHNRAQGSPFDV                  | 21       | 1-39           | 5              | QTYSVPTT    | 32            | 0.08                     |                |                                    |
| HK CV01-254 |           | S1-MBC      | IgM        | 3-7       | 4         | ASLLGGTVVNDY                   | 4        | 4-1            | 2              | QQYYSTQYT   | 2             | 0.09                     |                |                                    |

| mAb         | Clonality | Source cell | Ig isotype | IGHV gene | IGHJ gene                    | CDR H3                  | SHM IGHV | IGKV/IGLV gene | IGKJ/IGLJ gene | CDR L3      | SHM IGKV/IGLV | S1 reactivity (OD ratio) | RBD reactivity | Estimated IC <sub>50</sub> (ng/ml) |
|-------------|-----------|-------------|------------|-----------|------------------------------|-------------------------|----------|----------------|----------------|-------------|---------------|--------------------------|----------------|------------------------------------|
| HK CV01-257 | S1-MBC    | IgM         | 3-48       | 6         | ARHPWDDYGDYYYYYMDV           | 5                       | 3-20     | 2              | QQYGSSLNT      | 2           | 10.92         | ++                       | >250           |                                    |
| HL CV01-258 | S1-MBC    | IgG1        | 4-59       | 6         | ARAVHGVDTGMVYYYYHYMDV        | 7                       | 3-21     | 2              | QVWDNSIDHVV    | 5           | 0.08          |                          |                |                                    |
| HL CV01-260 | S1-MBC    | IgA2        | 1-8        | 4         | ARGREYDFWGSYYN               | 3                       | 2-14     | 3              | SSYTRSNTVV     | 6           | 0.14          |                          |                |                                    |
| HK CV01-266 | S1-MBC    | IgA1        | 3-15       | 3         | TSERWLDAFDI                  | 28                      | 1-39     | 5              | QQSYRSPFIT     | 24          | n.exp.        |                          |                |                                    |
| HL CV01-273 | S1-MBC    | IgA1        | 4-4        | 4         | ARGWGKGPPLGY                 | 2                       | 2-23     | 3              | YSYAGSSTWV     | 4           | 7.10          | -                        | >250           |                                    |
| HK CV01-274 | S1-MBC    | IgM         | 3-30       | 4         | AKDNGDYACFDY                 | 0                       | 4-1      | 4              | QQYYSTPLT      | 0           | 0.07          |                          |                |                                    |
| HL CV01-276 | S1-MBC    | IgA1        | 1-2        | 6         | ARDPFEYDFWGSYYRGGMDV         | 2                       | 2-14     | 3              | SSYSSSTRV      | 1           | n.exp.        |                          |                |                                    |
| HK CV03-101 | ASC       | IgG1        | 1-2        | 4         | ARGLITWYYYDSSAVDY            | 0                       | 3-20     | 1              | QQYGSSPWT      | 0           | 0.1           |                          |                |                                    |
| HK CV03-103 | ASC       | IgM         | 3-21       | 5         | ARDPDGHRSGWFDWFDP            | 3                       | 1D-12    | 5              | QQANSFPIT      | 4           | n.exp.        |                          |                |                                    |
| HL CV03-104 | ASC       | IgG1        | 1-18       | 6         | ARDSHYDSSGYYLYYYYGTDV        | 1                       | 3-25     | 1              | QSADSSGTYV     | 0           | 0.09          |                          |                |                                    |
| HK CV03-106 | 3-2       | ASC         | IgG1       | 4-31      | 3                            | ARGRTIFGVVSGAFDI        | 0        | 3-20           | 4              | QQYGSSPLT   | 1             | 0.02                     |                |                                    |
| HK CV03-107 | 3-2       | ASC         | IgG1       | 4-31      | 3                            | ARGRTIFGVVSGAFDI        | 0        | 3-20           | 4              | QQYGSSPLT   | 2             | 0.10                     |                |                                    |
| HL CV03-108 | ASC       | IgG1        | 3-15       | 6         | TKTKNPPAYDFWGSYYRGRPPYKYGMDV | 20                      | 1-40     | 1              | QSYDNLSEYDDV   | 10          | 0.1           |                          |                |                                    |
| HL CV03-109 | ASC       | IgG1        | 5-10-1     | 4         | ARHVGVGATHSPFDY              | 0                       | 1-40     | 2              | QSYDSSLGPTV    | 0           | 0.12          |                          |                |                                    |
| HK CV03-110 | ASC       | IgG1        | 3-48       | 4         | ARDLGSWYLLDFDY               | 1                       | 1-5      | 1              | QQYNSYPRT      | 0           | 0.08          |                          |                |                                    |
| HK CV03-112 | ASC       | IgG1        | 3-48       | 5         | GRSSSWRYNWFDP                | 20                      | 3-15     | 1              | QQYNNWPPWT     | 13          | 0.03          |                          |                |                                    |
| HL CV03-113 | ASC       | IgG1        | 3-15       | 4         | TTDPYIEISSGYSPDY             | 44                      | 2-11     | 2              | N/A            | 34          | 0.09          |                          |                |                                    |
| HL CV03-116 | ASC       | IgA1        | 4-59       | 6         | ARVQGRGSGSYSAYYYGMDV         | 0                       | 1-40     | 1              | QSYDSSLGTV     | 1           | 0.1           |                          |                |                                    |
| HL CV03-117 | 3-3       | ASC         | IgG1       | 1-46      | 6                            | LRDGISTFGVNNHYAMDV      | 16       | 2-14           | 1              | SSYSSSTVV   | 11            | n.exp.                   |                |                                    |
| HL CV03-118 | 3-3       | ASC         | IgG1       | 1-46      | 6                            | ARDGISTFGVVKHYAMDV      | 26       | 2-14           | 1              | SSYTTTTLV   | 26            | n.exp.                   |                |                                    |
| HL CV03-120 | ASC       | IgG1        | 3-21       | 6         | ARDSLITIFGVVIEAPDDYGMV       | 0                       | 2-14     | 2              | SSYSSSTVV      | 2           | n.exp.        |                          |                |                                    |
| HL CV03-121 | 3-1       | ASC         | IgG1       | 3-23      | 4                            | AKDYFVPPAALYDY          | 0        | 1-51           | 2              | GTWSSLSAGV  | 3             | n.exp.                   |                |                                    |
| HL CV03-123 | ASC       | IgG1        | 3-23       | 5         | VKELDQLTLGGWFDV              | 36                      | 2-23     | 3              | CSYVGTATVV     | 26          | 0.11          |                          |                |                                    |
| HL CV03-124 | ASC       | IgG1        | 5-51       | 4         | ASSVRYDFWDFDY                | 0                       | 1-44     | 1              | AAWDDSLNGYV    | 0           | n.exp.        |                          |                |                                    |
| HK CV03-129 | ASC       | IgG1        | 1-69       | 4         | ARARRPTYSSSWGTFDY            | 0                       | 1-39     | 1              | QQSYSTPWT      | 0           | 0.09          |                          |                |                                    |
| HK CV03-130 | ASC       | IgG1        | 4-59       | 4         | ASGTYGPPYLFDY                | 19                      | 1-5      | 1              | QKYNTYPGT      | 12          | n.exp.        |                          |                |                                    |
| HK CV03-131 | ASC       | IgM         | 3-11       | 4         | ARAGDMIVAAFDY                | 0                       | 3-20     | 4              | QQYGSSPLT      | 0           | 0.08          |                          |                |                                    |
| HK CV03-132 | ASC       | IgG1        | 3-7        | 6         | ARGPQMVAALFPYYYYGMDV         | 0                       | 1-27     | 1              | QKYNSAPWT      | 0           | 0.1           |                          |                |                                    |
| HK CV03-135 | ASC       | IgG1        | 3-64       | 3         | VMELYGSDVFDL                 | 22                      | 1-39     | 1              | QQSYRSTWT      | 18          | 0.1           |                          |                |                                    |
| HL CV03-138 | ASC       | IgM         | 3-74       | 4         | ASYTWGRI                     | 1                       | 2-14     | 2              | SSYTRSTLVV     | 2           | 0.08          |                          |                |                                    |
| HK CV03-139 | ASC       | IgM         | 4-39       | 6         | ASQGPLPILYDILTYGLDYGGYGMV    | 2                       | 2-28     | 4              | MALQTLPLT      | 1           | 0.09          |                          |                |                                    |
| HK CV03-140 | ASC       | IgG1        | 3-49       | 4         | TRDAYYSGSGSYSEGGH            | 0                       | 3-11     | 3              | QQRSNWPLFT     | 0           | 0.09          |                          |                |                                    |
| HK CV03-141 | ASC       | IgG1        | 4-38-2     | 6         | ARDVTGYDNEYYYYGLDV           | 24                      | 4-1      | 1              | QQYYSSPRT      | 9           | 0.08          |                          |                |                                    |
| HL CV03-142 | ASC       | IgM         | 3-53       | 4         | AREGPDSGYLDY                 | 7                       | 4-69     | 3              | QWGTGIRV       | 6           | 0.11          |                          |                |                                    |
| HK CV03-143 | ASC       | IgG1        | 3-48       | 4         | ARDSGFWSGYYPGNFNY            | 0                       | 1-33     | 4              | QQYDNLPLT      | 1           | 6.43          | ++                       | >250           |                                    |
| HK CV03-144 | ASC       | IgG1        | 1-18       | 6         | ARDPWIELRPPRNYNGMDV          | 11                      | 2-28     | 1              | MALQTPRT       | 4           | 0.08          |                          |                |                                    |
| HL CV03-145 | ASC       | IgG1        | 1-46       | 4         | ARDSSDCSGGSCYRFDY            | 0                       | 1-44     | 1              | AAWDDSLNGYV    | 0           | n.exp.        |                          |                |                                    |
| HK CV03-146 | ASC       | IgM         | 3-23       | 4         | AKDRTVTKTGLFLYDDC            | 10                      | 1-39     | 5              | QQSYSTPIT      | 6           | 0.08          |                          |                |                                    |
| HL CV03-147 | 3-4       | ASC         | IgA1       | 3-23      | 4                            | ASQTGTGEVDY             | 0        | 3-1            | 1              | QAWSSSTGV   | 0             | 4.2                      | -              | n.t.                               |
| HL CV03-148 | 3-1       | ASC         | IgG1       | 3-23      | 4                            | AKGPRLLWFGELSPFDY       | 1        | 1-51           | 2              | GTWSSLSALV  | 1             | 4.58                     | -              | n.t.                               |
| HL CV03-150 | 3-5       | ASC         | IgA1       | 3-23      | 6                            | VKSGSDIERMVSTLRYFFYGLEV | 22       | 1-47           | 3              | AVWDDSLSAWV | 12            | n.exp.                   |                |                                    |
| HL CV03-151 | 3-5       | ASC         | IgA1       | 3-23      | 6                            | VKSGSDIERMVSTLRYFFYGLDV | 17       | 1-47           | 3              | AVWDDSLSAWV | 10            | n.exp.                   |                |                                    |
| HL CV03-152 | ASC       | IgG1        | 3-30       | 4         | AKSGEVFWFRFRDYLDY            | 11                      | 1-44     | 2              | AAWDDRLNGVV    | 12          | 0.1           |                          |                |                                    |
| HK CV03-153 | ASC       | IgM         | 3-74       | 4         | ARDSTSTSCYESMK               | 7                       | 1-5      | 1              | QHYNSYPWM      | 5           | 0.12          |                          |                |                                    |
| HK CV03-154 | ASC       | IgG1        | 1-24       | 6         | ATSTVIAAAGTVHYYYYGMDV        | 0                       | 2-24     | 2              | MQATQFPYT      | 0           | 0.11          |                          |                |                                    |
| HK CV03-155 | ASC       | IgG1        | 3-33       | 6         | ARDEKAYDFWSGYLSYYYGMDV       | 1                       | 2-30     | 2              | MQGTHWPPYT     | 0           | 0.09          |                          |                |                                    |
| HK CV03-156 | ASC       | IgG1        | 5-10-1     | 4         | ARLLYYYDSSGYLLPSPIDY         | 0                       | 1-33     | 4              | QQYDNLTLT      | 0           | 0.54          | ++                       | >250           |                                    |
| HL CV03-158 | 3-5       | ASC         | IgA1       | 3-23      | 6                            | VKSGSDIERMVSTLRYFFYGLDV | 16       | 1-47           | 3              | AVWDDSLSAWV | 10            | 0.1                      |                |                                    |
| HL CV03-160 | ASC       | IgM         | 5-10-1     | 4         | ARLGADSSGYLLPSPGIGY          | 1                       | 1-40     | 3              | QSYDSSLGSKV    | 0           | 0.09          |                          |                |                                    |
| HL CV03-161 | ASC       | IgG1        | 4-39       | 2         | ARQRKGWLQLRGNWYFDL           | 2                       | 3-10     | 2              | YSTDSSGNQVV    | 0           | 0.09          |                          |                |                                    |

| mAb         | Clonality | Source cell | Ig isotype | IGHV gene | IGHJ gene | CDR H3                         | SHM IGHV | IGKV/IGLV gene | IGKJ/IGLJ gene | CDR L3        | SHM IGKV/IGLV | S1 reactivity (OD ratio) | RBD reactivity | Estimated IC <sub>50</sub> (ng/ml) |
|-------------|-----------|-------------|------------|-----------|-----------|--------------------------------|----------|----------------|----------------|---------------|---------------|--------------------------|----------------|------------------------------------|
| HL CV03-162 |           | ASC         | IgM        | 3-74      | 4         | ARGGGTVVTPGPDY                 | 11       | 4-69           | 2              | QTWGIGTHDVI   | 6             | 0.07                     |                |                                    |
| HL CV03-163 | 3-5       | ASC         | IgG1       | 3-23      | 6         | VKGSGLDIERMVDALRYFYGMDV        | 27       | 1-47           | 3              | AAWDDSLSAWV   | 15            | 1.17                     | -              | n.t.                               |
| HK CV03-166 |           | ASC         | IgA1       | 4-4       | 5         | TRLYCSSGACYLGP                 | 26       | 3-20           | 1              | QQYGRSPT      | 12            | 0.08                     |                |                                    |
| HL CV03-167 |           | ASC         | IgG1       | 1-46      | 5         | ARGRDWFDP                      | 1        | 2-23           | 3              | CSYAGSSTWV    | 5             | 0.11                     |                |                                    |
| HK CV03-168 |           | ASC         | IgG1       | 1-69      | 6         | AREAFYDILTGYSSPTNHYYGMDV       | 0        | 2-28           | 1              | MQALQTPWT     | 0             | 0.1                      |                |                                    |
| HK CV03-169 |           | ASC         | IgG1       | 3-74      | 4         | ARDFYYDSSGFYD                  | 0        | 1-39           | 1              | QQSYSTPPWT    | 0             | 7.53                     | -              | n.t.                               |
| HL CV03-170 |           | ASC         | IgG3       | 4-4       | 3         | ARDTIGGHAFDI                   | 0        | 3-21           | 3              | QVWDDSSDHRV   | 2             | 0.09                     |                |                                    |
| HL CV03-172 |           | ASC         | IgG1       | 1-24      | 5         | ATSTLFSSVVPASWFDP              | 0        | 2-14           | 2              | SSYTSSTPVPV   | 0             | 0.09                     |                |                                    |
| HK CV03-173 |           | ASC         | IgM        | 1-2       | 3         | ARILPSDYFWSGYYSIQETAFDI        | 0        | 1-5            | 2              | QQYNSYSSS     | 0             | 0.08                     |                |                                    |
| HK CV03-174 |           | ASC         | IgG1       | 5-51      | 4         | ARQVFIAVAGTGFYD                | 1        | 2-28           | 1              | MQALQTPWT     | 0             | 2.68                     | -              | > 250                              |
| HL CV03-175 |           | ASC         | IgG1       | 4-31      | 5         | ARDFVSGPLMTENVPIYDSSGYLTRYNWFD | 0        | 1-51           | 2              | GTWDDSSLSAVV  | 3             | 0.1                      |                |                                    |
| HL CV03-177 | 3-4       | ASC         | IgG1       | 3-23      | 4         | AKDSGSYLLN                     | 0        | 3-1            | 1              | QAWDSSTYV     | 1             | 3.3                      | -              | n.t.                               |
| HL CV03-179 |           | ASC         | IgG1       | 1-2       | 6         | AREDGSSPLGGGMDV                | 0        | 3-1            | 1              | QAWDSSTYV     | 1             | 0.09                     |                |                                    |
| HL CV03-180 | 3-5       | ASC         | IgA1       | 3-23      | 6         | VKGSGLDIERMVSSLRYFYGLDV        | 15       | 1-47           | 3              | AVWDDSLSAWV   | 12            | 0.09                     |                |                                    |
| HK CV03-181 |           | ASC         | IgG1       | 1-69      | 4         | ASTGHHQDASDY                   | 0        | 3-11           | 3              | QQRSNWPPRVT   | 0             | 0.07                     |                |                                    |
| HL CV03-182 |           | ASC         | IgG1       | 1-2       | 4         | ARERLAAAGTDFDY                 | 1        | 1-40           | 1              | QSYDSSLSDYV   | 2             | 0.09                     |                |                                    |
| HL CV03-183 | 3-5       | ASC         | IgA1       | 3-23      | 6         | VKGSGLDIERMVSSLRYFYGLDV        | 15       | 1-47           | 3              | AVWDDSLSAWV   | 10            | 0.13                     |                |                                    |
| HL CV03-185 |           | ASC         | IgG1       | 4-4       | 6         | ARRGHTLLWYYYGMDV               | 0        | 1-51           | 7              | GTWDDSSLSAGAV | 2             | 1.82                     | -              | > 250                              |
| HL CV03-186 |           | ASC         | IgG1       | 3-48      | 6         | ARGQRGLPFYYYGMDV               | 0        | 1-40           | 1              | QSYDSSLSGSV   | 0             | 0.12                     |                |                                    |
| HL CV03-188 | 3-5       | ASC         | IgA1       | 3-23      | 6         | VKGSGLDIERMVSTLRYFYGLDV        | 16       | 1-47           | 3              | AVWDDSLSAWV   | 14            | 0.08                     |                |                                    |
| HK CV03-190 |           | ASC         | IgG1       | 4-4       | 6         | ARGMGYDFWSGSYSSYYGMDV          | 0        | 1-16           | 4              | QQYNSYPLT     | 0             | 0.35                     | -              | > 250                              |
| HK CV03-191 |           | ASC         | IgM        | 3-11      | 4         | ARDLGYNRRFDY                   | 0        | 1-33           | 4              | QQYDNLPLT     | 1             | 6.16                     | ++             | > 250                              |
| HK CV03-192 |           | ASC         | IgG1       | 3-15      | 6         | TTDPLRYDSSGYLYGMDV             | 1        | 2-28           | 4              | MQALLTPST     | 1             | 0.12                     |                |                                    |
| HL CV03-193 |           | ASC         | IgM        | 3-53      | 3         | ARGGSWPNVFDI                   | 11       | 8-61           | 3              | VLYMGSGI WV   | 8             | 0.1                      |                |                                    |
| HL CV03-195 |           | ASC         | IgG1       | 1-18      | 6         | ARDRLRVRGVIKYYYYGMDV           | 0        | 3-25           | 3              | QSADSSGTHWV   | 2             | 0.17                     |                |                                    |
| HK CV05-101 |           | ASC         | IgA1       | 3-30      | 4         | AKDRGYSSSWFSLDS                | 13       | 3-20           | 4              | QQYGSRLRT     | 9             | n.exp.                   |                |                                    |
| HK CV05-102 | 5-1       | ASC         | IgM        | 1-3       | 3         | AREDTFSVFGVTRGNAYDV            | 26       | 3-20           | 1              | QQYGVSPRT     | 18            | n.exp.                   |                |                                    |
| HK CV05-104 |           | ASC         | IgA1       | 5-51      | 4         | ARLGRSLQPNLGFDL                | 28       | 2-30           | 4              | MQGSHWPLT     | 23            | 0.14                     |                |                                    |
| HK CV05-107 |           | ASC         | IgG1       | 3-21      | 4         | ARDSESAWNRIGNFYFDL             | 34       | 3-15           | 5              | QQYNDWLIT     | 19            | 0.07                     |                |                                    |
| HK CV05-108 |           | ASC         | IgG1       | 5-10-1    | 6         | ARHHLKRGYATRYGMDV              | 0        | 1-39           | 1              | QQSYSTPWT     | 0             | 0.12                     |                |                                    |
| HK CV05-109 |           | ASC         | IgA1       | 4-31      | 4         | ASLEGPYCSDDTTCYEGGQGLDY        | 11       | 3-11           | 1              | HQRGNWWT      | 6             | 0.09                     |                |                                    |
| HK CV05-110 | 5-1       | ASC         | IgG1       | 1-3       | 3         | AREDTFSVFGVTRGNAYDV            | 26       | 3-20           | 1              | QQYGVSPRT     | 18            | 0.08                     |                |                                    |
| HL CV05-111 |           | ASC         | IgA1       | 3-33      | 6         | ARDLDGDYVTTYGMDV               | 1        | 2-14           | 2              | SSYTSSTPVPV   | 1             | 8.39                     | ++             | > 250                              |
| HK CV05-113 |           | ASC         | IgG1       | 3-30      | 2         | ASGDGYRNFWYFDI                 | 31       | 2-28           | 4              | MQALQTPPT     | 13            | 0.09                     |                |                                    |
| HL CV05-114 |           | ASC         | IgG1       | 3-30-3    | 4         | ARTVGDYGDY                     | 0        | 3-1            | 2              | QAWDSSTVV     | 0             | 0.27                     |                |                                    |
| HK CV05-115 |           | ASC         | IgG1       | 3-48      | 6         | ARDRGGYSGYGPYYYGMDV            | 0        | 1-39           | 1              | QQSYSTPWT     | 0             | 5.17                     | -              | n.t.                               |
| HL CV05-116 |           | ASC         | IgA1       | 4-38-2    | 1         | N/A                            | 58       | 2-23           | 3              | CSYAGAGSSNVV  | 18            | n.exp.                   |                |                                    |
| HK CV05-117 |           | ASC         | IgM        | 3-23      | 6         | AKEKTSWLVAYYYGLDV              | 31       | 1-9            | 2              | QQVNSHPHT     | 13            | 0.11                     |                |                                    |
| HK CV05-118 | 5-2       | ASC         | IgA1       | 4-31      | 3         | ARDYPFCGADCPWVDVFDI            | 23       | 3-15           | 1              | QQYSNWPRT     | 30            | 0.09                     |                |                                    |
| HK CV05-119 |           | ASC         | IgG1       | 3-30      | 4         | AKPVGSSGYEYEGGKPIDY            | 0        | 1-5            | 1              | QQYNSYWT      | 3             | 0.12                     |                |                                    |
| HL CV05-119 |           | ASC         | IgG1       | 3-30      | 4         | AKPVGSSGYEYEGGKPIDY            | 0        | 3-21           | 3              | QVWDDSSDHWV   | 2             | 0.1                      |                |                                    |
| HL CV05-120 |           | ASC         | IgG1       | 5-51      | 4         | ARNRAGVIDY                     | 0        | 6-57           | 3              | QSYDSSNLWV    | 1             | 0.09                     |                |                                    |
| HL CV05-121 |           | ASC         | IgA1       | 1-8       | 3         | VRERIDYDHSGVSTSAFEF            | 27       | 1-44           | 1              | GGWDDSLNGYV   | 17            | 0.09                     |                |                                    |
| HL CV05-122 |           | ASC         | IgG1       | 3-23      | 6         | AKGGYCSGGNCKMAHSYYGLDV         | 21       | 1-47           | 3              | AAWDDSLSGHWV  | 7             | 0.07                     |                |                                    |
| HK CV05-125 |           | ASC         | IgM        | 4-39      | 5         | ASSNTASTMIVVVQRNWFDP           | 0        | 3-15           | 5              | QQYNNWPPT     | 1             | 0.1                      |                |                                    |
| HK CV05-126 |           | ASC         | IgG1       | 3-48      | 4         | ARDRARAKWLAYSNYFDY             | 0        | 3-15           | 5              | QQYNNWPL      | 0             | 0.11                     |                |                                    |
| HL CV05-127 |           | ASC         | IgG1       | 3-33      | 4         | ARDRVSSWEYFDY                  | 0        | 3-10           | 2              | YSTDSSGNHRGV  | 1             | 0.12                     |                |                                    |
| HL CV05-129 | 5-3       | ASC         | IgG1       | 4-59      | 6         | ARDRVSGGMDV                    | 0        | 3-21           | 2              | QVWDDSSDHWV   | 2             | n.exp.                   |                |                                    |
| HL CV05-131 |           | ASC         | IgA2       | 3-23      | 4         | ARGYIGYCSGSTCTTNGGGDY          | 23       | 1-51           | 2              | VTWDDSSLSAGV  | 8             | n.exp.                   |                |                                    |
| HL CV05-134 |           | ASC         | IgA1       | 3-23      | 3         | AKAGIRGGISMVRAHFDI             | 6        | 2-8            | 1              | SSYAGSNNFV    | 1             | 0.08                     |                |                                    |

| mAb         | Clonality | Source cell | Ig isotype | IGHV gene | IGHJ gene | CDR H3                     | SHM IGHV | IGKV/IGLV gene | IGKJ/IGLJ gene | CDR L3        | SHM IGKV/IGLV | S1 reactivity (OD ratio) | RBD reactivity | Estimated IC <sub>50</sub> (ng/ml) |
|-------------|-----------|-------------|------------|-----------|-----------|----------------------------|----------|----------------|----------------|---------------|---------------|--------------------------|----------------|------------------------------------|
| HK CV05-135 |           | ASC         | IgG1       | 3-33      | 4         | AREDTAMVQRFDY              | 0        | 1-39           | 2              | QQSYSTHT      | 0             | 0.11                     |                |                                    |
| HL CV05-135 |           | ASC         | IgG1       | 3-33      | 4         | AREDTAMVQRFDY              | 0        | 3-1            | 2              | QAWDSSNVV     | 2             | 0.1                      |                |                                    |
| HK CV05-136 |           | ASC         | IgG1       | 1-69      | 6         | ARGRDIVVESTDQDPMDV         | 14       | 4-1            | 5              | QQYYSTSSIT    | 6             | 0.07                     |                |                                    |
| HK CV05-138 | 5-2       | ASC         | IgA1       | 4-31      | 3         | ARDYPFCGADCPWVDVFDI        | 15       | 3-15           | 1              | QQYNNWPRT     | 12            | 0.06                     |                |                                    |
| HL CV05-139 |           | ASC         | IgG3       | 3-23      | 6         | AKDFSGANGDYYYGMDV          | 0        | 3-25           | 3              | QSADSSGTWV    | 2             | 0.09                     |                |                                    |
| HK CV05-140 |           | ASC         | IgG1       | 4-59      | 4         | AAGGGSGFYF                 | 30       | 1-5            | 2              | QQYKSSST      | 19            | 0.09                     |                |                                    |
| HL CV05-143 |           | ASC         | IgG1       | 4-59      | 4         | ARDRVAAGVDY                | 1        | 3-21           | 2              | QVWDSDDHVV    | 2             | 0.09                     |                |                                    |
| HL CV05-144 |           | ASC         | IgG1       | 3-30-3    | 6         | ARTPGDGMV                  | 0        | 3-10           | 2              | N/A           | 1             | 0.1                      |                |                                    |
| HL CV05-145 |           | ASC         | IgG1       | 5-10-1    | 4         | ARHAIYCSGGSCYAFDY          | 1        | 1-41           | 2              | N/A           | 3             | n.exp.                   |                |                                    |
| HK CV05-146 | 5-2       | ASC         | IgA1       | 4-31      | 3         | ARDYPFCGADCPWVDVFDI        | 22       | 3-15           | 1              | QQYNNWPRT     | 24            | 0.09                     |                |                                    |
| HK CV05-148 |           | ASC         | IgG1       | 4-39      | 4         | ARQRTHIFGVVHFYDY           | 1        | 4-1            | 1              | QQYYSTPWT     | 1             | 0.1                      |                |                                    |
| HK CV05-149 |           | ASC         | IgA1       | 4-59      | 6         | ARGWGFPGSTNVHFYFGLDV       | 29       | 1-9            | 1              | QLLNSYRT      | 16            | 0.1                      |                |                                    |
| HL CV05-151 |           | ASC         | IgM        | 4-59      | 6         | AAGEVVTAISSYYGMDV          | 0        | 3-1            | 2              | QAWDSSSVV     | 2             | 0.4                      | -              | >250                               |
| HK CV05-152 |           | ASC         | IgM        | 3-15      | 4         | TTERYIDYVWGSYRYSY          | 1        | 3-20           | 3              | QQYGSSPVT     | 1             | 0.09                     |                |                                    |
| HK CV05-153 |           | ASC         | IgA1       | 4-4       | 4         | ARDLNV                     | 28       | 3-15           | 3              | QQYVNWPF      | 26            | 0.07                     |                |                                    |
| HK CV05-155 |           | ASC         | IgM        | 1-2       | 6         | ARALRITMIVVTHYGMDV         | 0        | 3-20           | 2              | QQYGSSPYT     | 0             | 0.1                      |                |                                    |
| HK CV05-157 |           | ASC         | IgG1       | 3-48      | 4         | ARDKSDFWSGNFDY             | 15       | 1-33           | 2              | QQYDNLV       | 7             | 0.1                      |                |                                    |
| HL CV05-159 |           | ASC         | IgG1       | 4-38-2    | 4         | ARDKVDYPPYFDY              | 1        | 3-21           | 2              | QVWDSDDHRV    | 2             | 0.08                     |                |                                    |
| HK CV05-162 |           | ASC         | IgG2       | 3-21      | 4         | ARDQWSGTTVTSMGH            | 15       | 1-5            | 2              | QQYDSNWYT     | 15            | 0.09                     |                |                                    |
| HK CV05-163 |           | ASC         | IgG1       | 1-2       | 6         | AREVMVRGALPPYGMDV          | 0        | 3-11           | 4              | QQRSNWPPVT    | 0             | 10.44                    | ++             | 25-250                             |
| HK CV05-164 | 5-2       | ASC         | IgA1       | 4-31      | 3         | ARDYPFCGADCSWVDVFDI        | 21       | 3-15           | 1              | QQYNNWPRT     | 13            | 0.1                      |                |                                    |
| HK CV05-165 |           | ASC         | IgA1       | 3-74      | 4         | AREGGDGFY                  | 13       | 1-5            | 4              | QQYQSYPLA     | 14            | 0.1                      |                |                                    |
| HK CV05-167 |           | ASC         | IgG1       | 1-69      | 3         | ARGVEMATILPDDAFDI          | 0        | 3-15           | 4              | QQYNNWPPVT    | 0             | 0.09                     |                |                                    |
| HL CV05-169 |           | ASC         | IgA1       | 1-69      | 4         | ARGSTHNNLFVMDY             | 22       | 7-46           | 2              | FLSYSGVRGLFVV | 17            | 0.06                     |                |                                    |
| HL CV05-170 |           | ASC         | IgG1       | 1-2       | 6         | ARVDTTGTTFWLYYYGMDV        | 0        | 3-1            | 2              | QAWDSSTALVV   | 1             | 0.11                     |                |                                    |
| HK CV05-171 |           | ASC         | IgG1       | 4-30-4    | 4         | ARLHGDYFFDY                | 0        | 1-39           | 2              | QQSYSTHT      | 5             | n.exp.                   |                |                                    |
| HL CV05-171 |           | ASC         | IgG1       | 4-30-4    | 4         | ARLHGDYFFDY                | 0        | 3-1            | 2              | QAWDSSV       | 0             | 0.09                     |                |                                    |
| HK CV05-172 |           | ASC         | IgM        | 4-30-4    | 5         | ARLSMTTVTRGNWFD            | 0        | 1-39           | 2              | QQSYSTHT      | 0             | 0.08                     |                |                                    |
| HL CV05-174 |           | ASC         | IgG1       | 1-2       | 4         | ARDLSNGSSFDY               | 0        | 3-1            | 2              | QAWDSSTADV    | 0             | 0.11                     |                |                                    |
| HK CV05-175 |           | ASC         | IgG1       | 1-46      | 3         | VQDLGVRGRRALDV             | 22       | 2-28           | 2              | FQALQTPYT     | 7             | 0.11                     |                |                                    |
| HK CV05-176 |           | ASC         | IgG1       | 3-53      | 5         | ARGYPGGP                   | 0        | 1-33           | 4              | QQYDNL        | 0             | 0.18                     |                |                                    |
| HK CV05-178 |           | ASC         | IgA2       | 3-23      | 3         | AKDALGFCSGTSCYGEAFDI       | 19       | 1-5            | 2              | QQYNSYPYT     | 10            | 0.07                     |                |                                    |
| HL CV05-178 |           | ASC         | IgA2       | 3-23      | 3         | AKDALGFCSGTSCYGEAFDI       | 19       | 2-23           | 3              | CSYAGSSTWV    | 2             | n.exp.                   |                |                                    |
| HK CV05-181 |           | ASC         | IgG1       | 3-30-3    | 6         | ARDLQYYDFWSGYLGTGPRYYYGMDV | 0        | 3-20           | 1              | QQYGSSPPWT    | 0             | 0.07                     |                |                                    |
| HL CV05-182 | 5-3       | ASC         | IgG1       | 4-59      | 6         | ARDRVSGGMDV                | 0        | 3-21           | 2              | QVWDSDDHVV    | 1             | n.exp.                   |                |                                    |
| HK CV05-183 |           | ASC         | IgG1       | 3-30-3    | 6         | ARDLRFLEWLFNVPYYYGMDV      | 0        | 1-9            | 2              | QLLNSYPYT     | 0             | 0.11                     |                |                                    |
| HL CV05-183 |           | ASC         | IgG1       | 3-30-3    | 6         | ARDLRFLEWLFNVPYYYGMDV      | 0        | 2-23           | 3              | CSFAGGITLV    | 14            | n.exp.                   |                |                                    |
| HK CV05-185 |           | ASC         | IgM        | 3-15      | 4         | TTDRTYDYVWGSYR             | 0        | 1-39           | 4              | QQSYSTLPRT    | 1             | 0.06                     |                |                                    |
| HK CV05-187 |           | ASC         | IgG2       | 3-73      | 4         | TTIGSGYGFH                 | 10       | 1-39           | 2              | QQSYSTHT      | 1             | n.exp.                   |                |                                    |
| HL CV05-187 |           | ASC         | IgG2       | 3-73      | 4         | TTIGSGYGFH                 | 10       | 2-11           | 2              | CSYGGTYVL     | 11            | 0.1                      |                |                                    |
| HL CV05-189 |           | ASC         | IgG1       | 3-9       | 6         | AKAHSDPNYDFWSPDYGMDV       | 1        | 2-14           | 2              | SSYSTSSTKEV   | 5             | 0.10                     |                |                                    |
| HL CV05-190 |           | ASC         | IgG1       | 3-30-3    | 4         | ARGVYGDGSDY                | 1        | 3-21           | 1              | QVWDSDDHLYV   | 1             | 0.08                     |                |                                    |
| HK CV05-191 |           | ASC         | IgG2       | 3-11      | 6         | ARDTSQSHMDV                | 15       | 2-30           | 2              | MQGTHWPPYT    | 6             | 0.08                     |                |                                    |
| HK CV05-192 | 5-1       | ASC         | IgG1       | 1-3       | 3         | AREDTFSVFGVTRGNAYDV        | 26       | 3-20           | 1              | QQYGVSPRT     | 20            | 0.11                     |                |                                    |
| HL CV05-194 |           | ASC         | IgG1       | 3-74      | 1         | ARDRHTYSLEYFQH             | 0        | 6-57           | 3              | QSYDSSNQV     | 1             | 0.08                     |                |                                    |
| HL CV05-195 |           | ASC         | IgG1       | 3-30      | 4         | AKEGSKGWLQSSCYFDY          | 0        | 3-25           | 2              | QSADSSGTQV    | 2             | 0.1                      |                |                                    |
| HK CV07-102 |           | ASC         | IgG1       | 1-18      | 6         | ARDLARVGTWVWYGGMDV         | 2        | 2-30           | 1              | MQGTHWPRT     | 0             | n.exp.                   |                |                                    |
| HL CV07-103 |           | ASC         | IgM        | 3-23      | 4         | AKVYGSNTHTPVDY             | 5        | 2-8            | 2              | SSYAGSNNV     | 4             | 0.09                     |                |                                    |
| HK CV07-104 |           | ASC         | IgG1       | 3-7       | 6         | ARDAARYGMDV                | 24       | 1-39           | 2              | QQSYSTPRT     | 10            | 0.09                     |                |                                    |
| HK CV07-107 |           | ASC         | IgG3       | 3-23      | 6         | AKDRRTMIVVITNKYYGMDV       | 0        | 1-5            | 4              | QQYNSYPLT     | 0             | 0.11                     |                |                                    |

| mAb         | Clonality | Source cell | Ig isotype | IGHV gene | IGHJ gene | CDR H3                     | SHM IGHV | IGKV/IGLV gene | IGKJ/IGLJ gene | CDR L3       | SHM IGKV/IGLV | S1 reactivity (OD ratio) | RBD reactivity | Estimated IC <sub>50</sub> (ng/ml) |
|-------------|-----------|-------------|------------|-----------|-----------|----------------------------|----------|----------------|----------------|--------------|---------------|--------------------------|----------------|------------------------------------|
| HL CV07-108 |           | ASC         | IgM        | 3-15      | 4         | TTDADTSPVV                 | 4        | 4-69           | 3              | QTWDTGIRV    | 7             | 0.08                     |                |                                    |
| HK CV07-110 |           | ASC         | IgM        | 3-48      | 4         | ARSLRMG                    | 7        | 3-20           | 1              | HQYGSIPRT    | 12            | n.exp.                   |                |                                    |
| HK CV07-113 |           | ASC         | IgA1       | 4-59      | 6         | ARASFKMGTYHYGMDV           | 13       | 1-27           | 3              | QNYNSVPFT    | 12            | 0.08                     |                |                                    |
| HK CV07-114 |           | ASC         | IgG1       | 1-2       | 4         | TTLTAVVTPGLY               | 40       | 2-30           | 1              | MQGTHWPRT    | 1             | 0.07                     |                |                                    |
| HL CV07-118 |           | ASC         | IgM        | 3-15      | 3         | TTDEQRNYCTSPNCRGGAFDI      | 7        | 4-69           | 3              | QTWGTGIRV    | 7             | n.exp.                   |                |                                    |
| HK CV07-121 |           | ASC         | IgG1       | 4-39      | 5         | MRQGDWNYSYYFDA             | 35       | 2-30           | 4              | VQGTWLWPLT   | 12            | n.exp.                   |                |                                    |
| HK CV07-127 |           | ASC         | IgA1       | 4-39      | 6         | ARHPLALITIFGVSRQYGMVDV     | 0        | 1-12           | 1              | QQANSFPWT    | 1             | 0.1                      |                |                                    |
| HL CV07-128 |           | ASC         | IgG2       | 3-30-3    | 4         | ARELGTSGLTDS               | 23       | 2-14           | 3              | LSHSTFTTPQWV | 21            | 0.08                     |                |                                    |
| HL CV07-129 |           | ASC         | IgG1       | 3-48      | 3         | ASIASYDYVWGTNRPNDAFDI      | 17       | 2-23           | 1              | CSYGGPRNLV   | 15            | 0.09                     |                |                                    |
| HL CV07-132 |           | ASC         | IgM        | 4-4       | 4         | ARDRQYRGSYNYFYDY           | 3        | 1-44           | 3              | ATWDDSLNLRV  | 5             | 0.09                     |                |                                    |
| HK CV07-133 |           | ASC         | IgG2       | 4-39      | 4         | ARHQRPVTTFDIY              | 29       | 3-15           | 3              | QHYKDWPPFT   | 19            | 0.08                     |                |                                    |
| HK CV07-134 |           | ASC         | IgG1       | 3-23      | 6         | AKVMRDDFWSGYNYYYGMDV       | 6        | 3-20           | 2              | QQYGR        | 0             | 0.09                     |                |                                    |
| HK CV07-136 |           | ASC         | IgG1       | 4-59      | 6         | ARDNYSSRRYYYYYGMVDV        | 0        | 3-20           | 1              | QQYSSPTWT    | 0             | 0.10                     |                |                                    |
| HL CV07-137 |           | ASC         | IgM        | 4-30-4    | 5         | ARLSMTTVTRGNWFDP           | 0        | 1-47           | 3              | AAWDDSLSGWV  | 0             | 0.10                     |                |                                    |
| HK CV07-138 |           | ASC         | IgA2       | 3-23      | 2         | VKDFPFGGCTSTTNCDLFFAL      | 21       | 2-24           | 1              | MQATQFPRA    | 11            | n.exp.                   |                |                                    |
| HK CV07-139 |           | ASC         | IgG2       | 4-59      | 5         | AGYLRNDLDP                 | 11       | 3-11           | 4              | QQRSDWPLT    | 9             | n.exp.                   |                |                                    |
| HK CV07-140 |           | ASC         | IgA1       | 3-64      | 4         | AREYYGLLTGYLDL             | 19       | 1-39           | 1              | QQSYSIPWT    | 24            | 0.08                     |                |                                    |
| HK CV07-143 | 7-3       | ASC         | IgG1       | 3-23      | 4         | AKEFSIGWGLFDS              | 17       | 3-11           | 5              | QQRNNWPVT    | 13            | n.exp.                   |                |                                    |
| HK CV07-147 |           | ASC         | IgG1       | 1-2       | 6         | ARDLYDILTGYMPMDV           | 4        | 3-11           | 5              | QQRGNWPPT    | 4             | n.exp.                   |                |                                    |
| HK CV07-151 |           | ASC         | IgG1       | 1-58      | 3         | AADPGGVGYCSGGSCYRAFDI      | 1        | 3D-15          | 4              | QQYNNWPPALT  | 0             | 0.09                     |                |                                    |
| HL CV07-152 |           | ASC         | IgG1       | 1-69      | 3         | ARLRVPLTAHDAFDI            | 0        | 1-40           | 3              | QSYDSSVGV    | 3             | 0.09                     |                |                                    |
| HL CV07-154 |           | ASC         | IgG1       | 1-69      | 6         | ARAYCSGGSCSYYYGMDV         | 2        | 3-1            | 2              | QAWDSSTA     | 0             | 0.11                     |                |                                    |
| HK CV07-155 |           | ASC         | IgM        | 4-59      | 6         | ARVPREWLSPLYYG             | 2        | 1-5            | 1              | QQYNSYQWT    | 0             | 0.09                     |                |                                    |
| HL CV07-156 |           | ASC         | IgG1       | 3-9       | 4         | VKDNARTRRGSFDY             | 15       | 2-23           | 1              | CSYAGSNTYV   | 13            | 0.09                     |                |                                    |
| HL CV07-159 |           | ASC         | IgG2       | 3-48      | 3         | AREGELSNYDAFDI             | 18       | 2-11           | 1              | CSYAGTHSYV   | 9             | 0.08                     |                |                                    |
| HK CV07-161 |           | ASC         | IgG1       | 3-30      | 4         | AKEGSKGWLQSSCYFDY          | 1        | 2-28           | 5              | MQAFEPPIA    | 40            | 0.12                     |                |                                    |
| HK CV07-163 |           | ASC         | IgM        | 3-33      | 4         | ARDWAVAGNFDY               | 14       | 3-20           | 5              | QQYGASPPPT   | 7             | 0.09                     |                |                                    |
| HL CV07-164 |           | ASC         | IgA1       | 1-46      | 4         | ARDGSHWDFDY                | 22       | 2-14           | 3              | SSYVSSDAWV   | 4             | 0.09                     |                |                                    |
| HL CV07-165 |           | ASC         | IgM        | 3-53      | 4         | ARRAASGNWFDY               | 9        | 2-23           | 3              | CSYLGSATYV   | 19            | n.exp.                   |                |                                    |
| HK CV07-166 |           | ASC         | IgG1       | 1-18      | 6         | ARDTWDIVVPAASAYYGMVDV      | 21       | 2-28           | 2              | MQUALQHT     | 1             | n.exp.                   |                |                                    |
| HK CV07-172 |           | ASC         | IgM        | 3-15      | 4         | TTDRTYDYVWGSYRYRDIY        | 0        | 1-39           | 1              | QQTFSPPWT    | 27            | 0.07                     |                |                                    |
| HK CV07-173 |           | ASC         | IgM        | 3-30      | 6         | SKGFLEWLLRRYYYGMDV         | 3        | 1-9            | 3              | QQLNSYPFT    | 0             | 0.07                     |                |                                    |
| HK CV07-176 |           | ASC         | IgA1       | 5-51      | 6         | ARHFGGSGSYNGHWIPAYYYHGMVDV | 7        | 2-28           | 4              | MQARQTPPLT   | 4             | n.exp.                   |                |                                    |
| HL CV07-176 |           | ASC         | IgA1       | 5-51      | 6         | ARHFGGSGSYNGHWIPAYYYHGMVDV | 7        | 2-8            | 2              | SSYAGSTNLV   | 4             | n.exp.                   |                |                                    |
| HK CV07-178 |           | ASC         | IgG2       | 4-31      | 3         | ARDRTMVVWNAFDI             | 17       | 1-39           | 1              | QQSHSPSRT    | 13            | 0.18                     |                |                                    |
| HL CV07-179 |           | ASC         | IgA1       | 3-7       | 5         | ARESRLGIAIFDRRLRSWFGA      | 0        | 2-14           | 1              | SSYTSSSTRV   | 0             | n.exp.                   |                |                                    |
| HK CV07-180 |           | ASC         | IgM        | 3-15      | 4         | TTQHYDFWGSNYKPPAF          | 12       | 2-28           | 5              | MQUALQTLT    | 3             | 0.11                     |                |                                    |
| HL CV07-181 |           | ASC         | IgA1       | 3-33      | 4         | ARDEAAEYFYDY               | 1        | 3-25           | 3              | QSADSSGTFWV  | 1             | 0.11                     |                |                                    |
| HK CV07-183 |           | ASC         | IgG1       | 3-30      | 4         | AKEGSKGWIQNSCYFDY          | 12       | 4-1            | 1              | QQYYSTPPT    | 3             | n.exp.                   |                |                                    |
| HK CV07-185 |           | ASC         | IgA1       | 3-23      | 4         | VKDPNWANGY                 | 30       | 2-30           | 4              | VQGTHWPLT    | 16            | n.exp.                   |                |                                    |
| HK CV07-186 |           | ASC         | IgA1       | 1-46      | 4         | AKGRSTIFGVIVNQGDYDY        | 9        | 1-27           | 4              | QKYNAPL      | 4             | 0.10                     |                |                                    |
| HK CV07-189 |           | ASC         | IgG1       | 3-23      | 4         | AKDPHDFWGSNYFYDY           | 5        | 1D-12          | 4              | QQANSFPLT    | 0             | 0.06                     |                |                                    |
| HK CV07-190 |           | ASC         | IgM        | 4-31      | 3         | ARDRGVTFIVVIAFDI           | 1        | 3-20           | 4              | QQYSSPLT     | 0             | 0.05                     |                |                                    |
| HK CV07-191 |           | ASC         | IgG1       | 1-18      | 6         | SREGDLTIFGSVTNAYYYGMDV     | 3        | 1-39           | 5              | QQSYSTPIT    | 1             | n.exp.                   |                |                                    |
| HL CV07-196 | 7-1       | S1-MBC      | IgM        | 1-2       | 4         | ARDLIGIVAGNLDH             | 4        | 2-8            | 3              | SSYAGSNNWV   | 2             | 2.06                     | ++             | >250                               |
| HK CV07-199 |           | S1-MBC      | IgM        | 4-59      | 5         | ARDRDSGWYPNWFDP            | 2        | 1D-16          | 1              | QQYNSYPRT    | 0             | 0.07                     |                |                                    |
| HL CV07-200 | 7-2       | S1-MBC      | IgG1       | 1-2       | 6         | ARGPFYDNSGTLGGLDV          | 5        | 2-14           | 1              | SSYTSSSTYV   | 1             | 8.57                     | ++             | 25                                 |
| HL CV07-201 | 7-4       | S1-MBC      | IgM        | 1-2       | 6         | ATDRLVNTGVYTTGSMDV         | 8        | 2-23           | 1              | CSYGGSSDYV   | 2             | 4.03                     | ++             | >250                               |
| HK CV07-202 |           | S1-MBC      | IgG1       | 3-53      | 6         | ARDLYYYGMDV                | 4        | 1-9            | 4              | QQLNNSYVT    | 2             | 8.87                     | ++             | 25-250                             |
| HL CV07-203 |           | S1-MBC      | IgM        | 1-2       | 6         | ARKQQPSSLSYYYGMDV          | 1        | 1-40           | 3              | QSYDSSLSGSWV | 3             | 0.06                     |                |                                    |

| mAb         | Clonality | Source cell | Ig isotype | IGHV gene | IGHJ gene                  | CDR H3               | SHM IGHV | IGKV/IGLV gene | IGKJ/IGLJ gene | CDR L3      | SHM IGKV/IGLV | S1 reactivity (OD ratio) | RBD reactivity | Estimated IC <sub>50</sub> (ng/ml) |  |
|-------------|-----------|-------------|------------|-----------|----------------------------|----------------------|----------|----------------|----------------|-------------|---------------|--------------------------|----------------|------------------------------------|--|
| HL CV07-204 | S1-MBC    | IgM         | 4-39       | 6         | ALCGYSYGSNYYYYGMDV         | 0                    | 6-57     | 3              | QSYDSSIWV      | 2           | 0.09          |                          |                |                                    |  |
| HK CV07-205 | S1-MBC    | IgM         | 3-23       | 4         | AKEYGYDSSGSGGDY            | 0                    | 1-39     | 1              | QQSYSTPNT      | 0           | 0.07          |                          |                |                                    |  |
| HL CV07-205 | S1-MBC    | IgM         | 3-23       | 4         | AKEYGYDSSGSGGDY            | 0                    | 2-23     | 3              | CSYAGSSTWV     | 2           | n.exp.        |                          |                |                                    |  |
| HK CV07-206 | S1-MBC    | IgM         | 1-2        | 6         | AREGYDFWSGYTYYYYGMDV       | 0                    | 1-5      | 1              | QQYNSYWT       | 9           | n.exp.        |                          |                |                                    |  |
| HL CV07-206 | S1-MBC    | IgM         | 1-2        | 6         | AREGYDFWSGYTYYYYGMDV       | 0                    | 2-14     | 3              | SSYTSSTRV      | 1           | 3.98          | ++                       | 250            |                                    |  |
| HL CV07-208 | 7-2       | S1-MBC      | IgM        | 1-2       | 6                          | ARGPFYDSSGTLGGMDV    | 3        | 2-14           | 1              | SSYTSRNTYV  | 5             | n.exp.                   |                |                                    |  |
| HK CV07-209 | S1-MBC    | IgG1        | 3-11       | 4         | ARDGVIPPRFDY               | 2                    | 1-33     | 4              | QQYDNLPLT      | 1           | 12.06         | ++                       | <25            |                                    |  |
| HL CV07-210 | S1-MBC    | IgM         | 3-21       | 4         | VSSGNRYRFHY                | 8                    | 2-14     | 1              | SSYMSSTPYV     | 4           | 0.18          |                          |                |                                    |  |
| HL CV07-213 | 7-5       | S1-MBC      | IgM        | 1-8       | 4                          | ARGPSWNGYYYYFDY      | 6        | 1-44           | 2              | ASWDDRLNGVV | 7             | 0.1                      |                |                                    |  |
| HK CV07-214 | S1-MBC    | IgG1        | 6-1        | 3         | AREENAFDI                  | 0                    | 3-15     | 2              | QQYSNLLYT      | 4           | 7.69          | ++                       | >250           |                                    |  |
| HK CV07-215 | S1-MBC    | IgM         | 3-48       | 3         | AREGHAFDI                  | 2                    | 3-20     | 1              | QQYGSSPSWT     | 1           | 0.08          |                          |                |                                    |  |
| HK CV07-216 | S1-MBC    | IgM         | 3-7        | 4         | VAWGTTPLGTSENN             | 16                   | 2-30     | 2              | MQHTHWPHT      | 11          | 0.08          |                          |                |                                    |  |
| HL CV07-217 | 7-5       | S1-MBC      | IgM        | 1-8       | 4                          | ARGPSWNGYYYYFDY      | 6        | 1-44           | 2              | ASWDDSLNGVV | 8             | 0.12                     |                |                                    |  |
| HL CV07-218 | S1-MBC    | IgM         | 3-23       | 4         | AKRMGGNRFNPPVEY            | 12                   | 1-40     | 3              | HSYDSSLASV     | 6           | n.exp.        |                          |                |                                    |  |
| HK CV07-219 | S1-MBC    | IgG2        | 3-11       | 6         | ARDGIGQLWDDSYGYLDV         | 15                   | 2-30     | 2              | MQGAHWPPYT     | 10          | 3.68          | ++                       | >250           |                                    |  |
| HL CV07-221 | 7-4       | S1-MBC      | IgM        | 3-30      | 6                          | AKKAGYSSGWYTDYYNGMDV | 1        | 1-40           | 3              | QSYDSSLRGV  | 4             | 0.15                     |                |                                    |  |
| HL CV07-222 | S1-MBC    | IgG1        | 1-2        | 3         | ARGPYDSSGSLGAFDI           | 5                    | 2-23     | 1              | CSYAGGTSYV     | 2           | 12.03         | ++                       | <25            |                                    |  |
| HL CV07-223 | 7-5       | S1-MBC      | IgM        | 1-8       | 4                          | VRGPSWNGYYYYFDY      | 6        | 1-44           | 2              | ASWDDSLNGVV | 3             | 0.08                     |                |                                    |  |
| HL CV07-224 | S1-MBC    | IgM         | 5-51       | 6         | ARLGPYSSSSNGMDV            | 2                    | 2-23     | 3              | CSYAGSSTRV     | 3           | 0.08          |                          |                |                                    |  |
| HK CV07-225 | S1-MBC    | IgG1        | 4-31       | 6         | ARDTPPGYNWNGPYGMDV         | 9                    | 3-15     | 2              | QQYNNWPPGYT    | 4           | 4.78          | ++                       | >250           |                                    |  |
| HL CV07-226 | S1-MBC    | IgM         | 3-30       | 6         | AKKAGYSSGWYTDYYNGMDV       | 1                    | 2-8      | 3              | SSYASNRG       | 41          | n.exp.        |                          |                |                                    |  |
| HL CV07-230 | S1-MBC    | IgM         | 3-9        | 4         | AKEISGYFDY                 | 7                    | 4-69     | 3              | QTWGTGIHVV     | 14          | 0.08          |                          |                |                                    |  |
| HL CV07-231 | 7-4       | S1-MBC      | IgM        | 3-30      | 6                          | AKKAGYSSGWYTDYYNGMDV | 1        | 1-40           | 3              | QSYDSSLRGV  | 4             | 0.07                     |                |                                    |  |
| HL CV07-235 | S1-MBC    | IgM         | 3-23       | 6         | AKSTYGDYYYYGMDV            | 7                    | 2-14     | 3              | NSYTSNSSLGV    | 8           | 6.16          | ++                       | >250           |                                    |  |
| HK CV07-236 | S1-MBC    | IgM         | 3-53       | 4         | AREYSSGWYDY                | 0                    | 3-15     | 4              | QQYNNWPLT      | 3           | 0.09          |                          |                |                                    |  |
| HL CV07-237 | 7-2       | S1-MBC      | IgA1       | 1-2       | 6                          | ARGPFYDSSGTLGGMDV    | 3        | 2-14           | 1              | SSYTSSTYV   | 0             | 5.58                     | +              | n.t.                               |  |
| HL CV07-238 | S1-MBC    | IgM         | 1-8        | 6         | ARTNWNYYYYYGGMDV           | 0                    | 1-44     | 1              | AAWDDSLNGYV    | 2           | 0.09          |                          |                |                                    |  |
| HL CV07-239 | S1-MBC    | IgM         | 4-34       | 3         | ARGRWYHDNNGYRSDAFDV        | 17                   | 1-44     | 3              | AAWDDSLNEV     | 9           | 0.07          |                          |                |                                    |  |
| HL CV07-241 | S1-MBC    | IgM         | 3-74       | 4         | ITSMFNNGFY                 | 7                    | 2-11     | 2              | SSYAGSYTV      | 7           | 0.08          |                          |                |                                    |  |
| HL CV07-242 | S1-MBC    | IgM         | 3-15       | 5         | TTLWRLDV                   | 46                   | 7-46     | 3              | LLTHTDSRV      | 11          | n.exp.        |                          |                |                                    |  |
| HL CV07-249 | 7-1       | S1-MBC      | IgM        | 1-2       | 4                          | ARDLIGIVAGNLDH       | 1        | 2-8            | 3              | SSYAGSNWV   | 3             | 2.87                     | +              | n.t.                               |  |
| HL CV07-250 | S1-MBC    | IgG1        | 1-18       | 6         | AGSDNYGFPYNGMDV            | 17                   | 2-8      | 2              | SSYAGNDFV      | 16          | 8.27          | ++                       | 25             |                                    |  |
| HK CV07-251 | 7-3       | S1-MBC      | IgM        | 3-23      | 4                          | AKEFSIGWGLFDY        | 9        | 3-11           | 5              | QQRNWPVT    | 8             | 8.79                     | ++             | 25-250                             |  |
| HK CV07-252 | S1-MBC    | IgG1        | 1-46       | 6         | ARDKHWNNANYYYGMDV          | 1                    | 1-5      | 4              | QQYNSYL        | 2           | 6.03          | ++                       | >250           |                                    |  |
| HL CV07-254 | S1-MBC    | IgM         | 1-2        | 4         | ARDQGAALVGHNSY             | 10                   | 2-23     | 2              | CSYAGSSTWV     | 3           | 6.71          | ++                       | >250           |                                    |  |
| HL CV07-255 | S1-MBC    | IgG1        | 1-2        | 4         | ARDSRFSYVNGEFDY            | 3                    | 2-23     | 3              | CSYAGHSTWV     | 5           | 9.54          | ++                       | 25             |                                    |  |
| HL CV07-262 | S1-MBC    | IgG1        | 1-2        | 6         | ARVGWYDFGTGPDYYYYGMDV      | 6                    | 2-23     | 1              | CSYAGTSTFV     | 3           | 10.2          | ++                       | <25            |                                    |  |
| HK CV07-263 | S1-MBC    | IgG1        | 1-2        | 6         | ADSGYWGSHYYGMDV            | 3                    | 2D-29    | 1              | MQSIQLPLT      | 0           | 7.87          | ++                       | 25-250         |                                    |  |
| HL CV07-264 | 7-1       | S1-MBC      | IgA2       | 1-2       | 4                          | ARDLIGIVAGNLDH       | 1        | 2-8            | 3              | SSYAGSNWV   | 2             | 7.08                     | ++             | 250                                |  |
| HK CV07-265 | S1-MBC    | IgG1        | 3-48       | 6         | ARRRYSSWYYYYGMDV           | 2                    | 1-9      | 4              | QLNSYPLT       | 0           | 6.41          | -                        | n.t.           |                                    |  |
| HL CV07-266 | 7-4       | S1-MBC      | IgG1       | 1-2       | 6                          | ATDRLVNTGVYTTGSMVDV  | 8        | 2-23           | 1              | CSYGGSSDYV  | 2             | 4.62                     | ++             | >250                               |  |
| HL CV07-267 | 7-6       | S1-MBC      | IgA1       | 1-2       | 6                          | ARVFGPLDCSSTCYTYGMDV | 2        | 2-23           | 3              | CSYAGSSWV   | 1             | 8.47                     | ++             | 250                                |  |
| HL CV07-270 | S1-MBC    | IgG3        | 3-11       | 5         | ARARGSSGWYRIGTRWGNWFDP     | 2                    | 2-14     | 2              | SSYTSSTNVV     | 0           | 8.53          | ++                       | 25-250         |                                    |  |
| HL CV07-271 | S1-MBC    | IgA1        | 1-2        | 6         | ARVPFAYCSSTSCDRGTPYYYYGMDV | 0                    | 2-14     | 2              | SSYTSSTLV      | 3           | 8.28          | ++                       | >250           |                                    |  |
| HK CV07-272 | S1-MBC    | IgM         | 3-64       | 4         | ARGLDNNGYSGY               | 16                   | 3-20     | 1              | QQYGSSTPRT     | 5           | 0.08          |                          |                |                                    |  |
| HL CV07-274 | 7-7       | S1-MBC      | IgM        | 1-2       | 4                          | ARDQKNDILTGLGDY      | 4        | 2-8            | 3              | SSYAGSNWV   | 1             | 3.97                     | ++             | >250                               |  |
| HL CV07-275 | S1-MBC    | IgG1        | 3-66       | 4         | ARDYYDSSGYSSGGLGY          | 0                    | 2-8      | 1              | SSYAGSNFV      | 0           | 4.51          | ++                       | >250           |                                    |  |
| HL CV07-280 | 7-2       | S1-MBC      | IgA1       | 1-2       | 6                          | ARGPFYDSSGTLGGMDV    | 2        | 2-14           | 1              | SSYTSSTYV   | 0             | 7.29                     | ++             | 25-250                             |  |
| HL CV07-281 | 7-2       | S1-MBC      | IgM        | 1-2       | 6                          | ARGPFYDSSGTLGGMDV    | 2        | 2-14           | 1              | SSYTSSTYV   | 0             | 5.07                     | +              | n.t.                               |  |
| HL CV07-283 | 7-2       | S1-MBC      | IgA1       | 1-2       | 6                          | VRGPFYDSSGTLGGMDV    | 7        | 2-14           | 1              | SSYTSSTYV   | 2             | 9.89                     | ++             | 25                                 |  |

| mAb         | Clonality | Source cell | Ig isotype | IGHV gene | IGHJ gene             | CDR H3                 | SHM IGHV | IGKV/IGLV gene | IGKJ/IGLJ gene | CDR L3     | SHM IGKV/IGLV | S1 reactivity (OD ratio) | RBD reactivity | Estimated IC <sub>50</sub> (ng/ml) |
|-------------|-----------|-------------|------------|-----------|-----------------------|------------------------|----------|----------------|----------------|------------|---------------|--------------------------|----------------|------------------------------------|
| HL CV07-284 | S1-MBC    | IgM         | 5-51       | 6         | ASGGDYPYGMVDV         | 5                      | 1-44     | 3              | AAWDDSLSAWV    | 1          | 0.87          | ++                       | >250           |                                    |
| HL CV07-285 | 7-2       | S1-MBC      | IgA1       | 1-2       | 6                     | ARGPFYYDNSGTLGGLDV     | 5        | 2-14           | 1              | SSYSSSTYV  | 1             | 9.3                      | ++             | 25                                 |
| HL CV07-286 | S1-MBC    | IgG1        | 3-9        | 6         | AKGGRYCSGTNCEYYFFAMDV | 8                      | 2-8      | 2              | SSYAGSNNNVV    | 3          | 0.09          |                          |                |                                    |
| HK CV07-287 | S1-MBC    | IgG1        | 1-58       | 3         | AAPYCSSTNICYDAFDI     | 0                      | 3-20     | 1              | QQYGSSPWT      | 0          | 9.25          | ++                       | 25-250         |                                    |
| HK CV07-289 | S1-MBC    | IgM         | 1-2        | 6         | ARGAAMVTGYTYYYGLDV    | 3                      | 3-20     | 5              | QQYGSSPIT      | 2          | 0.07          |                          |                |                                    |
| HL CV07-290 | 7-7       | S1-MBC      | IgM        | 1-2       | 4                     | ARDQKNDILTGLGDY        | 0        | 2-8            | 3              | SSYAGSNNWV | 0             | 3.02                     | ++             | >250                               |
| HL CV07-292 | 7-7       | S1-MBC      | IgM        | 1-2       | 4                     | ARDQKNDILTGLGDY        | 3        | 2-8            | 3              | SSYAGSNNWV | 0             | 7.92                     | ++             | 250                                |
| HK CV07-293 | S1-MBC    | IgM         | 3-11       | 6         | ARCNGGGACFYGMVDV      | 10                     | 4-1      | 5              | QQYYSTLT       | 3          | 0.07          |                          |                |                                    |
| HL CV07-293 | S1-MBC    | IgM         | 3-11       | 6         | ARCNGGGACFYGMVDV      | 10                     | 2-14     | 3              | SSYTSSTWV      | 4          | 0.07          |                          |                |                                    |
| HL CV07-294 | 7-2       | S1-MBC      | IgM        | 1-2       | 6                     | ARGPFYDSSGTLGGMDV      | 2        | 2-14           | 1              | SSYSSSTYV  | 0             | 5.69                     | ++             | >250                               |
| HL CV07-297 | S1-MBC    | IgM         | 3-53       | 4         | ARRSASGWNFDY          | 13                     | 2-8      | 3              | SSYAGSNNLV     | 8          | 0.08          |                          |                |                                    |
| HL CV07-299 | S1-MBC    | IgM         | 5-51       | 4         | ATSHGYSGYELGY         | 9                      | 2-14     | 3              | SSYSSSTWV      | 29         | n.exp.        |                          |                |                                    |
| HK CV07-301 | S1-MBC    | IgG1        | 1-2        | 6         | ARVDTTGTTFWLYYYGMDV   | 2                      | 2D-29    | 3              | N/A            | 0          | 0.17          |                          |                |                                    |
| HL CV07-301 | S1-MBC    | IgG1        | 1-2        | 6         | ARVDTTGTTFWLYYYGMDV   | 0                      | 2-23     | 3              | CSYAGSSTWV     | 2          | n.exp.        |                          |                |                                    |
| HK CV07-302 | S1-MBC    | IgA1        | 3-9        | 6         | AKDKGPYYYYGMDV        | 0                      | 2D-29    | 1              | MQSIQLPQT      | 0          | 1.51          | ++                       | 250            |                                    |
| HL CV07-303 | 7-1       | S1-MBC      | IgM        | 1-2       | 4                     | ARDLGIGVAGNLDH         | 4        | 2-8            | 3              | SSYAGSNNWV | 3             | 4.71                     | ++             | 250                                |
| HL CV07-304 | 7-6       | S1-MBC      | IgA1       | 1-2       | 6                     | ARVFGPGLDCSSTSCYTYGMDV | 1        | 2-23           | 3              | CSYAGSNSWV | 2             | 8.08                     | ++             | >250                               |
| HL CV07-305 | 7-1       | S1-MBC      | IgM        | 1-2       | 4                     | ARDLGIGVAGNLDH         | 2        | 2-8            | 3              | SSYAGSNNWV | 2             | 0.93                     | ++             | >250                               |
| HK CV07-306 | S1-MBC    | IgA1        | 1-2        | 4         | ARGTLYDILTGPSPKLDY    | 0                      | 1-39     | 1              | QQSYSTPWT      | 0          | 8.25          | ++                       | 250            |                                    |
| HL CV07-307 | 7-2       | S1-MBC      | IgA2       | 1-2       | 6                     | ARGPFYYDNSGTLGGLDV     | 5        | 2-14           | 1              | SSYSSSTYV  | 1             | 9.27                     | ++             | 25                                 |
| HL CV07-309 | 7-2       | S1-MBC      | IgM        | 1-2       | 6                     | ARGPFYYDNSGTLGGLDV     | 5        | 2-14           | 1              | SSYSSSTYV  | 1             | 8.62                     | ++             | 25-250                             |
| HL CV07-310 | 7-2       | S1-MBC      | IgA1       | 1-2       | 6                     | ARGPFYDSSGTLGGMDV      | 3        | 2-14           | 1              | SSYSSSTYV  | 0             | 5.11                     | +              | n.t                                |
| HL CV07-312 | S1-MBC    | IgM         | 1-2        | 6         | ARIPFVVSTPGQYYYYGMDV  | 6                      | 2-14     | 3              | ISYSSSTWV      | 1          | 0.18          |                          |                |                                    |
| HL CV07-313 | 7-4       | S1-MBC      | IgA1       | 1-2       | 6                     | ATDRLVNTGVYTTGSMVDV    | 9        | 2-23           | 1              | CSYGGSSDYV | 2             | 0.09                     |                |                                    |
| HK CV07-315 | S1-MBC    | IgG1        | 3-9        | 6         | AKDFLWDLHPPRYGMDV     | 0                      | 1-39     | 2              | QQSYSTHA       | 1          | 0.16          |                          |                |                                    |
| HL CV07-315 | S1-MBC    | IgG1        | 3-9        | 6         | AKDFLWDLHPPRYGMDV     | 0                      | 1-51     | 3              | GTWSSSLNGV     | 1          | 11.4          | ++                       | 25             |                                    |
| HL CV07-316 | 7-2       | S1-MBC      | IgA1       | 1-2       | 6                     | ARGPFYDSSGTLGGMDV      | 2        | 2-14           | 1              | SSYSSSTYV  | 1             | 3.12                     | +              | n.t                                |
| HL CV07-317 | 7-7       | S1-MBC      | IgM        | 1-2       | 4                     | ARDQKNDILTGLGHY        | 0        | 2-8            | 3              | SSYAGSNNWV | 0             | 2.53                     | ++             | >250                               |
| HK CV07-319 | S1-MBC    | IgM         | 1-2        | 5         | ARGPFFFEVVVAEFGWFDP   | 28                     | 3-15     | 5              | QQYNNWPPIT     | 1          | n.exp.        |                          |                |                                    |
| HL CV07-319 | S1-MBC    | IgM         | 1-2        | 5         | ARGPFFFEVVVAEFGWFDP   | 28                     | 2-8      | 1              | SSYAGSNNYV     | 0          | n.exp.        |                          |                |                                    |
| HL CV07-323 | 7-6       | S1-MBC      | IgA1       | 1-2       | 6                     | ARVFGPGLDCSSTSCYTYGMDV | 0        | 2-23           | 3              | CSYAGSSWV  | 1             | 7.39                     | ++             | >250                               |
| HL CV07-324 | 7-2       | S1-MBC      | IgA1       | 1-2       | 6                     | ARGPFYDSSGTLGGMDV      | 4        | 2-14           | 1              | SSYSSSTYV  | 3             | 11.02                    | ++             | 25-250                             |
| HK CV23-101 | S1-MBC    | IgM         | 3-30       | 4         | ARDWEYYGSGTKAFDY      | 9                      | 1-13     | 4              | QHFNSYPLT      | 9          | 4.33          | ++                       | >250           |                                    |
| HL CV23-103 | S1-MBC    | IgA1        | 1-2        | 4         | N/A                   | 47                     | 2-14     | 2              | SSYTRSTAVV     | 19         | n.exp.        |                          |                |                                    |
| HL CV23-113 | S1-MBC    | IgM         | 5-51       | 4         | ATTRGYSDFEYFAY        | 11                     | 2-8      | 3              | SSYAGSNNFPWV   | 3          | n.exp.        |                          |                |                                    |
| HK CV23-114 | S1-MBC    | IgM         | 4-31       | 5         | ARDLGRSDFGSGSGVGVDP   | 10                     | 3-15     | 1              | QQYHNWPPWT     | 5          | n.exp.        |                          |                |                                    |
| HL CV23-115 | S1-MBC    | IgM         | 1-2        | 3         | ARGYYDILIGYATTHDAFDL  | 8                      | 2-14     | 3              | SSYDSSSTWV     | 6          | n.exp.        |                          |                |                                    |
| HK CV23-116 | S1-MBC    | IgM         | 3-21       | 6         | ARASLVTMVRGAGNYMDV    | 0                      | 3-11     | 5              | QQRSNWPLT      | 0          | 0.11          |                          |                |                                    |
| HL CV23-116 | S1-MBC    | IgM         | 3-21       | 6         | ARASLVTMVRGAGNYMDV    | 0                      | 2-23     | 3              | CSYAGSRV       | 2          | 0.09          |                          |                |                                    |
| HL CV23-121 | S1-MBC    | IgM         | 1-2        | 4         | ARELGSWDGRFDY         | 0                      | 2-23     | 3              | CSYAGSSTWV     | 0          | 0.10          |                          |                |                                    |
| HK CV23-126 | S1-MBC    | IgM         | 4-59       | 6         | ARDTTSYCSGSGCYNYGMDV  | 7                      | 2-28     | 3              | MQALQTPRT      | 3          | 0.07          |                          |                |                                    |
| HL CV24-198 | 24-1      | S1-MBC      | IgA1       | 1-2       | 3                     | ARDLAYSMVRGISGI        | 7        | 2-23           | 3              | CSYAGSNTWV | 7             | 5.48                     | ++             | 250                                |
| HL CV24-201 | 24-1      | S1-MBC      | IgA1       | 1-2       | 3                     | ARDLAYSMVRGISGI        | 7        | 2-23           | 3              | CSYAGSNTWV | 9             | 5.79                     | ++             | >250                               |
| HK CV24-220 | S1-MBC    | IgA2        | 3-48       | 4         | ARDRGSWLSLDESDFDH     | 15                     | 1-39     | 2              | QQKSIPYT       | 17         | n.exp.        |                          |                |                                    |
| HL CV24-223 | 24-5      | S1-MBC      | IgM        | 4-39      | 4                     | ARLRWLRGEFDY           | 0        | 6-57           | 3              | QSYDSSSTYV | 0             | 8.83                     | ++             | >250                               |
| HL CV24-226 | 24-5      | S1-MBC      | IgM        | 4-39      | 4                     | ARLRWLRGEFDY           | 0        | 6-57           | 3              | QSYDSSSTYV | 0             | 8.77                     | ++             | >250                               |
| HL CV24-236 | S1-MBC    | IgM         | 3-49       | 4         | IRGGYGGNSGFYD         | 5                      | 1-51     | 2              | GTWSSLSAVV     | 3          | 0.15          |                          |                |                                    |
| HL CV24-243 | ASC       | IgM         | 3-7        | 4         | ARLYSGNYFDY           | 6                      | 4-69     | 3              | QTWDTAIWV      | 14         | n.exp.        |                          |                |                                    |
| HK CV24-247 | ASC       | IgA1        | 3-48       | 5         | ARGFYDILTGYYSFHFIDL   | 16                     | 1-5      | 1              | QQYNTYWT       | 7          | 0.35          |                          |                |                                    |
| HK CV24-248 | 24-2      | ASC         | IgG1       | 3-33      | 6                     | ARREGVADYYYYGMDV       | 8        | 1-6            | 1              | LQVYNYPWT  | 6             | 0.09                     |                |                                    |

| mAb         | Clonality | Source cell | Ig isotype | IGHV gene | IGHJ gene | CDR H3                     | SHM IGHV | IGKV/IGLV gene | IGKJ/IGLJ gene | CDR L3       | SHM IGKV/IGLV | S1 reactivity (OD ratio) | RBD reactivity | Estimated IC <sub>50</sub> (ng/ml) |
|-------------|-----------|-------------|------------|-----------|-----------|----------------------------|----------|----------------|----------------|--------------|---------------|--------------------------|----------------|------------------------------------|
| HL CV24-249 |           | ASC         | IgG1       | 1-18      | 6         | AREYDYSNPNYYYYYGM DV       | 0        | 3-27           | 3              | YSAADNMGV    | 1             | 0.08                     |                |                                    |
| HK CV24-252 |           | ASC         | IgG1       | 3-74      | 6         | VRVSGPFHDYFLYAMDV          | 19       | 3-20           | 1              | QHYSAAWT     | 14            | 0.09                     |                |                                    |
| HL CV24-253 | 24-3      | ASC         | IgA1       | 1-2       | 4         | ARVFHGVITPFYD              | 12       | 5-37           | 2              | MIWPSSAVV    | 7             | 0.07                     |                |                                    |
| HK CV24-255 |           | ASC         | IgG1       | 4-34      | 4         | ARGRLGFEELFRGVFFYYFDY      | 21       | 1-39           | 2              | QQTFNSPRT    | 22            | 0.07                     |                |                                    |
| HK CV24-256 | 24-4      | ASC         | IgM        | 3-49      | 5         | TRAQEEKITMIRRIISWFDP       | 5        | 3-20           | 5              | QYQSSPIT     | 6             | 0.1                      |                |                                    |
| HL CV24-260 |           | ASC         | IgG1       | 4-59      | 6         | ARLLKSCTGGICQTYFYAMDV      | 21       | 1-40           | 1              | QSYDGLSSESAV | 20            | 0.1                      |                |                                    |
| HK CV24-262 |           | ASC         | IgA1       | 4-31      | 4         | ARGTTYTIFGVVISPFYD         | 0        | 3-20           | 4              | QYQSSPLT     | 0             | 0.09                     |                |                                    |
| HK CV24-265 |           | ASC         | IgG1       | 4-34      | 5         | ARGAPGT                    | 30       | 1-5            | 2              | QHYSTFPYT    | 15            | 0.1                      |                |                                    |
| HK CV24-268 |           | ASC         | IgG1       | 3-9       | 4         | TTGYCRSNCLTFYAF            | 20       | 1-39           | 2              | QYSRAPVT     | 13            | 0.08                     |                |                                    |
| HL CV24-269 |           | ASC         | IgM        | 4-31      | 6         | ARDYFGRSGSGSSLYYYGMDV      | 0        | 3-1            | 2              | QAWDSSTV     | 0             | 5.39                     | -              | n.t.                               |
| HK CV24-271 |           | ASC         | IgG1       | 3-21      | 4         | ARVAAGQKYFFDY              | 0        | 1-9            | 4              | QQLNS        | 0             | 0.12                     |                |                                    |
| HL CV24-275 |           | ASC         | IgG1       | 3-30      | 6         | AKVANVFMLYPRGSWGM DV       | 14       | 1-47           | 3              | AAWDDSLSGWV  | 14            | 0.09                     |                |                                    |
| HK CV24-280 |           | ASC         | IgG1       | 3-48      | 6         | AAGSSTSPSPV                | 0        | 3-15           | 1              | QQYNNWPRT    | 0             | 0.16                     |                |                                    |
| HK CV24-282 |           | ASC         | IgG1       | 3-23      | 6         | AKDRGRRRLTHLGVAPDV         | 23       | 1-39           | 2              | QSYTTPYT     | 19            | 0.15                     |                |                                    |
| HK CV24-283 |           | ASC         | IgM        | 3-66      | 4         | CGGYGSSWYLDY               | 20       | 3-11           | 2              | QQRSNWPYT    | 10            | 0.15                     |                |                                    |
| HL CV24-284 |           | ASC         | IgG1       | 4-31      | 4         | ARGGLSSRNGGNRSYSSSSFLGRQDY | 0        | 2-14           | 1              | SSYTSSSTLYV  | 1             | 0.15                     |                |                                    |
| HL CV24-285 |           | ASC         | IgM        | 5-51      | 4         | ARFLSFVTSPTRYDY            | 6        | 2-14           | 1              | SSYTSSSTLV   | 8             | 0.14                     |                |                                    |
| HK CV24-286 |           | ASC         | IgG1       | 1-69      | 3         | ARHLPLSGYAFDV              | 22       | 3-20           | 2              | QYQSSPYT     | 13            | 0.19                     |                |                                    |
| HK CV24-287 |           | ASC         | IgM        | 3-23      | 3         | AKDRSGGILAGSGGALDI         | 26       | 1-5            | 1              | QQYSSYRT     | 14            | 0.16                     |                |                                    |
| HL CV24-290 |           | ASC         | IgG1       | 4-39      | 4         | ARASEDISLERAYNYGLTIDF      | 10       | 3-9            | 2              | QVWDSSTVV    | 6             | 0.16                     |                |                                    |
| HL CV24-293 |           | ASC         | IgA1       | 3-7       | 6         | ARENYDSSGYYYAYYYGMDV       | 0        | 3-25           | 1              | QSADSSGTIV   | 3             | n.exp.                   |                |                                    |
| HK CV24-294 |           | ASC         | IgM        | 3-9       | 4         | ARGDLGIRYFDY               | 5        | 3-15           | 5              | QQYNNWPPIT   | 1             | n.exp.                   |                |                                    |
| HL CV24-294 |           | ASC         | IgM        | 3-9       | 4         | ARGDLGIRYFDY               | 5        | 2-23           | 3              | CSYAGSSTWV   | 2             | n.exp.                   |                |                                    |
| HK CV24-296 |           | ASC         | IgG3       | 1-18      | 1         | N/A                        | 11       | 4-1            | 2              | QQYHSTPPA    | 4             | n.exp.                   |                |                                    |
| HL CV24-296 |           | ASC         | IgG3       | 1-18      | 1         | N/A                        | 11       | 2-23           | 3              | CSYAGSSTWV   | 2             | n.exp.                   |                |                                    |
| HK CV24-298 |           | ASC         | IgG1       | 3-33      | 3         | ARGWGGDGYTVDAFDV           | 19       | 2-28           | 2              | MQUALPPYI    | 9             | n.exp.                   |                |                                    |
| HK CV24-301 |           | ASC         | IgG1       | 1-46      | 5         | ARSLYSGSYGAYNWFDP          | 19       | 3-11           | 4              | LQRINWLT     | 13            | n.exp.                   |                |                                    |
| HK CV24-309 |           | ASC         | IgG1       | 4-61      | 6         | AREQVLDPLYYGIDV            | 29       | 1-39           | 2              | QQSYSTHT     | 1             | n.exp.                   |                |                                    |
| HL CV24-309 |           | ASC         | IgG1       | 4-61      | 6         | AREQVLDPLYYGIDV            | 29       | 3-1            | 2              | QAWDSSTVI    | 23            | n.exp.                   |                |                                    |
| HL CV24-310 | 24-3      | ASC         | IgG1       | 1-2       | 4         | ARVFHGVITPFDF              | 19       | 5-37           | 2              | MIWPSSDVV    | 4             | n.exp.                   |                |                                    |
| HL CV24-311 |           | ASC         | IgG1       | 1-2       | 4         | ARGADIFITFGVVIKENDY        | 0        | 2-18           | 2              | SSYTSSSTLV   | 2             | n.exp.                   |                |                                    |
| HL CV24-314 |           | ASC         | IgM        | 3-30      | 4         | ARGKNYGYSDDLQFHFYD         | 3        | 7-43           | 3              | LLHYGSSQLGV  | 12            | n.exp.                   |                |                                    |
| HK CV24-316 |           | ASC         | IgG1       | 1-69      | 6         | ARALGLSGHGMDV              | 29       | 1-39           | 2              | QHSYSTPHT    | 17            | n.exp.                   |                |                                    |
| HL CV24-317 |           | ASC         | IgG1       | 4-4       | 3         | AKESWLELWLQAGFDI           | 16       | 2-11           | 2              | CSYGGSYTFVV  | 12            | n.exp.                   |                |                                    |
| HL CV24-319 |           | ASC         | IgG1       | 1-46      | 6         | ARDLWMEYENDSGIQKTADQGM DV  | 16       | 3-1            | 3              | QAWDINTVV    | 17            | n.exp.                   |                |                                    |
| HK CV24-321 |           | ASC         | IgM        | 3-33      | 3         | ARDMVRGPNASDI              | 10       | 1-12           | 4              | QQANSFPLT    | 4             | n.exp.                   |                |                                    |
| HL CV24-322 |           | ASC         | IgG1       | 4-39      | 4         | ARQRTHTIFGVVHFYD           | 1        | 3-25           | 1              | QSADSSGTIV   | 3             | n.exp.                   |                |                                    |
| HK CV24-323 | 24-4      | ASC         | IgM        | 3-49      | 5         | TRAQEEKITMIRRIISWFDP       | 5        | 3-20           | 5              | QYQSSPIT     | 6             | n.exp.                   |                |                                    |
| HK CV24-325 | 24-4      | ASC         | IgM        | 3-49      | 5         | TRAQEEKITMIRRIISWFDP       | 5        | 3-20           | 5              | QYQSSPIT     | 8             | n.exp.                   |                |                                    |
| HK CV24-329 |           | ASC         | IgM        | 3-33      | 3         | ARDMVRGPNASDI              | 10       | 3-15           | 5              | QQYNNWPPVT   | 3             | n.exp.                   |                |                                    |
| HK CV24-330 | 24-4      | ASC         | IgM        | 3-49      | 5         | TRAQEEKITMIRRIISWFDP       | 5        | 3-20           | 5              | QYQSSPIT     | 11            | n.exp.                   |                |                                    |
| HL CV24-331 |           | ASC         | IgG1       | 3-23      | 6         | AKEVPDIIVAVAVGMDV          | 21       | 1-47           | 2              | ASWDDSLSGVL  | 12            | n.exp.                   |                |                                    |
| HL CV24-332 |           | ASC         | IgG1       | 1-2       | 6         | ARETRETYYDILTYFFYYFGMDV    | 9        | 1-51           | 2              | GTWDGSLSAAV  | 11            | n.exp.                   |                |                                    |
| HL CV24-333 |           | ASC         | IgM        | 3-15      | 4         | SSDLPKWGSGMADY             | 13       | 8-61           | 3              | VLYMGSDIWA   | 12            | n.exp.                   |                |                                    |
| HK CV24-336 | 24-4      | ASC         | IgM        | 3-49      | 5         | TRAQEEKITMIRRIISWFDP       | 5        | 3-20           | 5              | QYQSSPIT     | 8             | n.exp.                   |                |                                    |
| HK CV24-344 | 24-2      | ASC         | IgG1       | 3-33      | 6         | ARREGVADYSYSCGMDV          | 10       | 1-6            | 1              | LQVYNYPT     | 11            | n.exp.                   |                |                                    |
| HK CV24-346 |           | ASC         | IgG1       | 1-69      | 3         | ARSDDSSGYLKEENDAFDI        | 0        | 2-30           | 2              | MQGTHWREYT   | 1             | n.exp.                   |                |                                    |
| HL CV24-347 |           | ASC         | IgG3       | 1-2       | 6         | ARDRLYCSSTSCYTPYYYYYGM DV  | 0        | 3-25           | 3              | QSADSSGTIV   | 3             | n.exp.                   |                |                                    |
| HL CV38-102 |           | S1-MBC      | IgG1       | 3-23      | 2         | AKVETRQVGF DL              | 1        | 3-1            | 2              | QAWDSSTVV    | 1             | 8.7                      | -              | n.t.                               |
| HK CV38-103 |           | S1-MBC      | IgA1       | 3-11      | 4         | ARDWNLSGYYGGGR             | 1        | 1-16           | 4              | QQYNSYPLT    | 0             | 5.84                     | ++             | >250                               |



| mAb         | Clonality | Source cell | Ig isotype | IGHV gene | IGHJ gene | CDR H3                   | SHM IGHV | IGKV/IGLV gene | IGKJ/IGLJ gene | CDR L3         | SHM IGKV/IGLV | S1 reactivity (OD ratio) | RBD reactivity | Estimated IC <sub>50</sub> (ng/ml) |
|-------------|-----------|-------------|------------|-----------|-----------|--------------------------|----------|----------------|----------------|----------------|---------------|--------------------------|----------------|------------------------------------|
| HK CV38-105 |           | S1-MBC      | IgG1       | 3-74      | 6         | ARQRVARRRGFGESPFYYGLDV   | 22       | 1-6            | 1              | LQNYNFPRT      | 7             | 0.26                     |                |                                    |
| HL CV38-107 | 38-1      | S1-MBC      | IgA1       | 1-2       | 4         | ARDGAQYILTGFDFY          | 0        | 2-8            | 1              | SSYAGSNNYV     | 0             | 0.58                     | +              | n.t.                               |
| HK CV38-113 |           | S1-MBC      | IgG1       | 3-53      | 4         | ARGGRLADAAGDY            | 1        | 1-33           | 2              | QQYDNLPSWT     | 1             | 11.47                    | ++             | 25                                 |
| HK CV38-114 |           | S1-MBC      | IgM        | 5-51      | 4         | ARAGNDNSLDY              | 1        | 1-39           | 2              | QQSYTTPYT      | 18            | 0.17                     |                |                                    |
| HL CV38-114 | 38-4      | S1-MBC      | IgM        | 5-51      | 4         | ARAGNDNSLDY              | 1        | 9-49           | 3              | GADHGSGSNFVQKV | 1             | 8.13                     | ++             | >250                               |
| HL CV38-115 |           | S1-MBC      | IgG1       | 3-7       | 5         | ARDLYYYDSSNGVNWFD        | 3        | 1-40           | 1              | QSYDSSLGSGYV   | 1             | 8.04                     | ++             | n.t.                               |
| HL CV38-117 |           | S1-MBC      | IgG1       | 4-30-4    | 4         | ARVTRIIYSGSYCFDY         | 0        | 2-23           | 2              | CSYVGSSTFV     | 2             | 9.55                     | ++             | >250                               |
| HK CV38-118 |           | S1-MBC      | IgA1       | 4-59      | 4         | ARAWSSSWYLDY             | 3        | 3-11           | 4              | QQRSNWPPVT     | 0             | 0.51                     | +              | n.t.                               |
| HL CV38-119 |           | S1-MBC      | IgA1       | 4-4       | 4         | ARAWNFDY                 | 0        | 2-23           | 3              | CSYAGSSNWV     | 1             | 5.56                     | ++             | >250                               |
| HL CV38-122 |           | S1-MBC      | IgG1       | 3-23      | 3         | AKVLDI                   | 0        | 2-14           | 1              | SSYTSSTPYV     | 2             | n.exp.                   |                |                                    |
| HK CV38-124 |           | S1-MBC      | IgG1       | 4-59      | 6         | ATYYYDSSGYPYGMDV         | 1        | 1-9            | 3              | QLNSYPG        | 3             | 6.07                     | ++             | >250                               |
| HL CV38-125 | 38-4      | S1-MBC      | IgG1       | 5-51      | 4         | ARHQYSSSSLGY             | 1        | 9-49           | 3              | GADHGSGSNFVYM  | 1             | 8.53                     | ++             | >250                               |
| HK CV38-127 |           | S1-MBC      | IgG1       | 3-33      | 4         | ARDPEIVVGGVDY            | 0        | 2-30           | 2              | MQGTHWPYT      | 0             | 3.45                     | ++             | >250                               |
| HK CV38-128 |           | S1-MBC      | IgA1       | 3-11      | 4         | ARDWNLSGYGGGR            | 0        | 1-39           | 2              | QQSYTTPYT      | 18            | 0.15                     |                |                                    |
| HK CV38-129 |           | S1-MBC      | IgG1       | 4-31      | 3         | ARDQGASASWDAFDI          | 0        | 3-20           | 4              | QQYGSSTL       | 0             | 2.24                     | ++             | >250                               |
| HK CV38-131 |           | S1-MBC      | IgA1       | 3-11      | 4         | ARDHSVRFLEWLLPY          | 0        | 1-9            | 1              | QLNSYPWT       | 3             | 1.93                     | +              | n.t.                               |
| HK CV38-132 |           | S1-MBC      | IgG1       | 4-31      | 4         | ARAERSITIFGVVTSAFDY      | 1        | 4-1            | 2              | QQYYSTPYT      | 0             | 1.24                     | +              | n.t.                               |
| HK CV38-134 |           | S1-MBC      | IgG1       | 4-34      | 4         | ASSGWYYPDY               | 3        | 3-20           | 4              | QQYGSSPNT      | 0             | 7.98                     | ++             | >250                               |
| HL CV38-135 |           | S1-MBC      | IgG1       | 3-23      | 3         | AKVTGLGNAFDI             | 3        | 3-1            | 2              | QAWDSSTV       | 0             | 7.19                     | -              | n.t.                               |
| HL CV38-136 |           | S1-MBC      | IgG1       | 4-4       | 5         | ARSSGRGRVVALGSDP         | 1        | 2-23           | 3              | CSYAGSSTWV     | 0             | 8.52                     | -              | n.t.                               |
| HK CV38-139 |           | S1-MBC      | IgG1       | 3-53      | 4         | ARGHYDLFDY               | 3        | 1-9            | 3              | QLNSYPPGT      | 0             | 8.33                     | ++             | 25-250                             |
| HK CV38-140 |           | S1-MBC      | IgA1       | 4-31      | 4         | ARAYDSSGYYPDY            | 0        | 1-39           | 4              | QQSYSTLT       | 0             | 2.56                     | ++             | >250                               |
| HK CV38-142 |           | S1-MBC      | IgG1       | 5-51      | 4         | ARIRGVYSSGWIGGDY         | 4        | 1-39           | 1              | QQSYSTPRQWT    | 0             | 9.39                     | ++             | 25                                 |
| HL CV38-143 | 38-1      | S1-MBC      | IgM        | 1-2       | 4         | ARDGAQYILTGFDFY          | 0        | 2-8            | 1              | SSYAGSNNYV     | 0             | 2.30                     | +              | n.t.                               |
| HK CV38-146 |           | S1-MBC      | IgG1       | 1-69      | 5         | ARAATYYYDSSGYTPNWFD      | 1        | 1-39           | 2              | QQSYSTLYT      | 0             | 2.17                     | ++             | >250                               |
| HL CV38-147 |           | S1-MBC      | IgG1       | 3-9       | 4         | AKDRRIAVAGTGEDYFDY       | 4        | 3-21           | 2              | QVWDSDDQV      | 1             | 11.7                     | ++             | 250                                |
| HL CV38-148 |           | S1-MBC      | IgG1       | 3-66      | 4         | ARSAPLVGAYSGIYFDY        | 2        | 9-49           | 2              | GADHGSGSNFV    | 1             | 7.26                     | ++             | >250                               |
| HK CV38-149 | 38-3      | S1-MBC      | IgM        | 3-9       | 4         | AKNRVAGTIFGVGPFDY        | 0        | 1-6            | 4              | LQDNYPLT       | 1             | 0.73                     | -              | n.t.                               |
| HK CV38-150 |           | S1-MBC      | IgG1       | 3-30      | 3         | AKSQWLVRHAFDI            | 0        | 2D-29          | 1              | MQSIQLWT       | 0             | 11.04                    | -              | n.t.                               |
| HL CV38-156 |           | S1-MBC      | IgG1       | 4-59      | 4         | ARFSYYYDSSGYDFDY         | 0        | 2-23           | 3              | CSYAGSSWV      | 3             | 0.42                     |                |                                    |
| HK CV38-158 |           | S1-MBC      | IgM        | 3-15      | 6         | TTDRWFQELFSAYYYYGMDV     | 0        | 3-11           | 3              | QQRSNWPPIFT    | 0             | 0.17                     |                |                                    |
| HL CV38-159 |           | S1-MBC      | IgG1       | 1-2       | 4         | ARGNTVFWSGPPLDY          | 0        | 2-14           | 1              | SSYTSSTYV      | 0             | 4.27                     | +              | n.t.                               |
| HL CV38-160 |           | S1-MBC      | IgG1       | 3-23      | 3         | AKVAGRGNAFDI             | 3        | 7-43           | 2              | LLYGGAL        | 3             | n.exp.                   |                |                                    |
| HK CV38-165 |           | S1-MBC      | IgG3       | 4-4       | 4         | ARRSLGNYSYDHDY           | 1        | 3-15           | 5              | QQYNNWPPAIT    | 1             | 5.09                     | -              | n.t.                               |
| HL CV38-165 |           | S1-MBC      | IgG3       | 4-4       | 4         | ARRSLGNYSYDHDY           | 1        | 1-44           | 1              | AAWDDSLNGYV    | 0             | 0.15                     |                |                                    |
| HL CV38-173 |           | S1-MBC      | IgG3       | 3-30-3    | 4         | ARDYGGYNYN               | 4        | 3-1            | 2              | QAWDSSTV       | 0             | 9.92                     | -              | n.t.                               |
| HK CV38-177 | 38-3      | S1-MBC      | IgG1       | 3-9       | 4         | AKDMVVVAIFGVGPFDY        | 1        | 1-6            | 4              | LQDNYPLT       | 1             | 10.77                    | -              | n.t.                               |
| HK CV38-179 |           | S1-MBC      | IgM        | 5-51      | 3         | ARQRRPPGKRVLTMIVVYNDAFDI | 1        | 1-33           | 3              | QQYDNLFT       | 0             | n.exp.                   |                |                                    |
| HL CV38-179 |           | S1-MBC      | IgM        | 5-51      | 3         | ARQRRPPGKRVLTMIVVYNDAFDI | 1        | 1-40           | 2              | QSYDSSLGSGV    | 2             | n.exp.                   |                |                                    |
| HL CV38-180 |           | S1-MBC      | IgG1       | 4-4       | 4         | ARRAAAGPRPYDY            | 2        | 2-23           | 3              | CSYAGFSTWV     | 6             | n.exp.                   |                |                                    |
| HK CV38-181 |           | S1-MBC      | IgA1       | 1-2       | 3         | ARDLGSYLYGAFDI           | 1        | 3-11           | 4              | QQRSNWPT       | 4             | 6.17                     | ++             | >250                               |
| HL CV38-182 |           | S1-MBC      | IgA1       | 1-69      | 2         | AKELGYSYGAAHRYFDL        | 3        | 1-40           | 2              | QSYDSSLGSGV    | 0             | 11.73                    | ++             | 250                                |
| HL CV38-183 |           | S1-MBC      | IgG1       | 3-53      | 6         | ARGDGWDNYYGMDV           | 0        | 1-40           | 2              | QSYDSSLGSGV    | 2             | 11.06                    | ++             | <25                                |
| HK CV38-184 |           | S1-MBC      | IgG1       | 4-39      | 5         | ARGLGWFD                 | 0        | 1-NL1          | 2              | QQYYSTPPRT     | 0             | 1.89                     | ++             | 250                                |
| HL CV38-186 |           | S1-MBC      | IgG1       | 1-2       | 4         | ARDQSPDILKSPFDY          | 1        | 2-23           | 3              | CSYAGSSTFG     | 0             | 6.51                     | ++             | 250                                |
| HL CV38-193 |           | S1-MBC      | IgA1       | 3-11      | 4         | ARDISRNLHDFRPPYFDY       | 2        | 7-46           | 3              | LLSYSGARV      | 1             | 1.53                     | +              | n.t.                               |
| HL CV38-194 |           | S1-MBC      | IgG1       | 4-59      | 3         | ARHDVYSSGWYEGAFDI        | 2        | 1-40           | 3              | QSYDSSLGSGWV   | 3             | 0.09                     |                |                                    |
| HL CV38-199 |           | ASC         | IgG3       | 4-59      | 4         | ARYYQDFDY                | 0        | 1-44           | 1              | AAWDDSLNGPYV   | 1             | 0.07                     |                |                                    |
| HK CV38-201 |           | ASC         | IgG1       | 3-30      | 4         | AKDIVLVAIIPVPIFDY        | 2        | 3-11           | 5              | QQRSNWPT       | 1             | 0.07                     |                |                                    |
| HL CV38-202 |           | ASC         | IgG1       | 3-33      | 3         | ARDSSQQQLAYAFDI          | 2        | 3-1            | 2              | QAWDSSIV       | 1             | 0.1                      |                |                                    |

| mAb         | Clonality | Source cell | Ig isotype | IGHV gene | IGHJ gene | CDR H3                    | SHM IGHV | IGKV/IGLV gene | IGKJ/IGLJ gene | CDR L3        | SHM IGKV/IGLV | S1 reactivity (OD ratio) | RBD reactivity | Estimated IC <sub>50</sub> (ng/ml) |
|-------------|-----------|-------------|------------|-----------|-----------|---------------------------|----------|----------------|----------------|---------------|---------------|--------------------------|----------------|------------------------------------|
| HL CV38-205 |           | ASC         | IgG1       | 4-30-2    | 6         | ARDHYPIYYYGMDV            | 0        | 6-57           | 2              | QSYDSSTV      | 1             | 0.09                     |                |                                    |
| HK CV38-206 |           | ASC         | IgA2       | 3-7       | 6         | ARKGNAIDV                 | 3        | 1-5            | 2              | LQYNSYSWYT    | 1             | 0.08                     |                |                                    |
| HL CV38-207 | 38-5      | ASC         | IgA1       | 4-30-4    | 3         | AKIRVRAGFRWAFDI           | 22       | 2-14           | 3              | SSYTNTNTLV    | 20            | 0.09                     |                |                                    |
| HL CV38-208 |           | ASC         | IgM        | 4-39      | 2         | AHQSGNSGPWYFDL            | 0        | 8-61           | 2              | VLYMGSGIVV    | 1             | 0.08                     |                |                                    |
| HL CV38-210 |           | ASC         | IgG1       | 4-39      | 4         | ARHVEPDYGGNSFDY           | 0        | 1-40           | 1              | QSYDSSLGYYV   | 1             | 0.11                     |                |                                    |
| HL CV38-211 |           | ASC         | IgG1       | 3-9       | 6         | AKDISNKWLRLTQPYSYYGLDV    | 3        | 2-8            | 1              | SSYAGSNIPYV   | 7             | 0.08                     |                |                                    |
| HL CV38-213 |           | ASC         | IgG1       | 3-23      | 3         | AKVLIRNGYDILTGYPYDAFDI    | 0        | 2-14           | 2              | SSYSSSTLV     | 0             | 3.15                     | +              | n.t.                               |
| HL CV38-215 |           | ASC         | IgA1       | 3-30-3    | 4         | ARDGYSAYDFGY              | 20       | 8-61           | 3              | VLFMGSGTWV    | 18            | n.exp.                   |                |                                    |
| HK CV38-217 |           | ASC         | IgA1       | 4-30-2    | 4         | ASGPAWELFDY               | 17       | 3-15           | 3              | QSYHNWPL      | 15            | 0.10                     |                |                                    |
| HK CV38-219 |           | ASC         | IgA1       | 4-39      | 4         | ARQMRIGHTIVVPAALDY        | 2        | 3-20           | 1              | QQYYSSPWT     | 5             | 0.07                     |                |                                    |
| HK CV38-221 |           | ASC         | IgG1       | 3-66      | 4         | ARGFGDYFFDY               | 4        | 3-20           | 2              | QLYLT         | 1             | 10.74                    | ++             | 25-250                             |
| HK CV38-222 |           | ASC         | IgG1       | 4-30-4    | 6         | ARDPWQVTIFGVVIRYGMVDV     | 0        | 1-9            | 2              | QLLNSPRT      | 3             | 0.09                     |                |                                    |
| HL CV38-225 |           | ASC         | IgM        | 3-11      | 5         | ARDLWFGRYWGNWLDLP         | 10       | 1-51           | 3              | GTWDNSLSAAV   | 7             | 0.09                     |                |                                    |
| HL CV38-227 |           | ASC         | IgA1       | 3-66      | 6         | ASEGRTTGTVAYYYFAMDV       | 15       | 2-8            | 2              | SSYAGRSNVV    | 15            | 0.09                     |                |                                    |
| HK CV38-228 | 38-6      | ASC         | IgA1       | 4-31      | 4         | AREKGTGDYYLDY             | 16       | 3-15           | 1              | QQYNSWPRA     | 17            | 0.08                     |                |                                    |
| HL CV38-229 | 38-5      | ASC         | IgA1       | 4-30-4    | 3         | AKIRVRAGFRWAFDI           | 23       | 2-14           | 3              | SSYTNTNTLV    | 20            | 0.09                     |                |                                    |
| HL CV38-230 |           | ASC         | IgG1       | 3-53      | 4         | ARDNSSNWYFDS              | 8        | 3-25           | 1              | QSADSSGTYV    | 10            | n.exp.                   |                |                                    |
| HL CV38-231 |           | ASC         | IgG1       | 3-33      | 6         | ARDGLDDDDYIWGSFKIRYYMDV   | 1        | 2-8            | 3              | SSYSGTTNFAQ   | 19            | 0.08                     |                |                                    |
| HL CV38-232 |           | ASC         | IgA1       | 3-23      | 4         | ASGTYRLGDY                | 26       | 1-44           | 3              | AAWDDSLDGPV   | 15            | n.exp.                   |                |                                    |
| HL CV38-233 |           | ASC         | IgG1       | 4-4       | 5         | VTGGRWRFPD                | 16       | 2-11           | 3              | CSYAGTYTYWL   | 12            | 0.08                     |                |                                    |
| HK CV38-235 | 38-2      | ASC         | IgA1       | 3-23      | 4         | VRDLSSSDPWYFDF            | 15       | 3D-20          | 1              | QQYGDSPT      | 11            | n.exp.                   |                |                                    |
| HK CV38-236 |           | ASC         | IgG1       | 3-64      | 6         | ARGGYEIVVVPDYYYGMDV       | 0        | 3-20           | 4              | QQYKD         | 0             | 5.74                     | -              | n.t.                               |
| HK CV38-238 | 38-7      | ASC         | IgM        | 3-30      | 6         | AKDPLNCSSTRCYTAWIYYYYGMDV | 0        | 2D-29          | 4              | MQSIQLPLT     | 0             | 0.09                     |                |                                    |
| HK CV38-240 | 38-7      | ASC         | IgG1       | 3-30      | 6         | AKDSVKGYSSGWYYYYGMDV      | 0        | 2D-29          | 4              | MQSIQLPLT     | 0             | 0.09                     |                |                                    |
| HK CV38-242 | 38-2      | ASC         | IgA1       | 3-23      | 4         | ARDLSSSDPWYFDF            | 14       | 3D-20          | 1              | QQYGDSPT      | 11            | 0.08                     |                |                                    |
| HK CV38-243 |           | ASC         | IgM        | 3-21      | 4         | ARDRSGWYRNLFYD            | 1        | 2-28           | 5              | MQUALQASIT    | 0             | 0.08                     |                |                                    |
| HK CV38-245 |           | ASC         | IgG2       | 3-49      | 3         | TRDFDHADSFDI              | 24       | 2-28           | 2              | MQUALHTPRYT   | 9             | 0.09                     |                |                                    |
| HK CV38-248 |           | ASC         | IgG2       | 3-30      | 4         | AKGFYDSGP                 | 12       | 2-30           | 2              | MQGTHWKT      | 3             | 0.10                     |                |                                    |
| HL CV38-251 |           | ASC         | IgA2       | 3-23      | 6         | AKDQTVSFFYYGMDV           | 5        | 1-47           | 1              | ATWDDSLGYYV   | 10            | 0.07                     |                |                                    |
| HK CV38-252 |           | ASC         | IgM        | 1-3       | 4         | ARDNTNTWFGSIEY            | 36       | 4-1            | 3              | QQNYATPLT     | 21            | n.exp.                   |                |                                    |
| HL CV38-255 |           | ASC         | IgG2       | 3-9       | 4         | VREATRGAHFDC              | 32       | 2-8            | 1              | SSYVGFNNLDNFV | 19            | 0.07                     |                |                                    |
| HK CV38-257 |           | ASC         | IgM        | 4-34      | 2         | ARRIYYGDLGNWNFDL          | 24       | 1-16           | 4              | QQYNSYPLT     | 20            | n.exp.                   |                |                                    |
| HL CV38-259 |           | ASC         | IgG1       | 1-69      | 4         | ATLYCSGGSCFPTGVFGY        | 0        | 7-46           | 3              | LLSYSGARSWV   | 1             | 0.05                     |                |                                    |
| HK CV38-263 | 38-6      | ASC         | IgA1       | 4-31      | 4         | AREKGTGDYYLDS             | 21       | 3-15           | 1              | QQYNSWPRA     | 21            | 0.09                     |                |                                    |
| HK CV38-265 |           | ASC         | IgG1       | 3-23      | 6         | AKDGHSMVRGVTMWGEFYYYGMDV  | 0        | 3-15           | 2              | QQYNNWPPYT    | 0             | 0.1                      |                |                                    |
| HK CV38-270 |           | ASC         | IgG2       | 3-9       | 3         | VRSRWQLTSSAFDM            | 33       | 1-9            | 4              | QLLNKYPIT     | 25            | n.exp.                   |                |                                    |
| HK CV38-271 | 38-6      | ASC         | IgA1       | 4-31      | 5         | AREKGTGDYYLDP             | 22       | 3-15           | 2              | QQYNSWPRA     | 21            | 0.09                     |                |                                    |
| HL CV38-273 |           | ASC         | IgG1       | 1-2       | 6         | ARTYYYDSSGYRNYYYGMDV      | 4        | 2-18           | 1              | SLYSSSTYV     | 0             | 0.18                     |                |                                    |
| HK CV38-275 |           | ASC         | IgG1       | 3-15      | 4         | TTDRGNSITIFGVVIIDRPY      | 0        | 3-20           | 2              | QQYGSS        | 0             | n.exp.                   |                |                                    |
| HL CV38-276 |           | ASC         | IgA1       | 3-21      | 6         | ARDEGSPGLDYYGMDV          | 1        | 2-14           | 2              | SSYTSNTTLVV   | 4             | 0.08                     |                |                                    |
| HL CV38-278 | 38-5      | ASC         | IgA1       | 4-30-4    | 3         | AKIRVRAGFRWAFDI           | 21       | 2-14           | 3              | SSYTNTNTLV    | 22            | 0.08                     |                |                                    |
| HL CV38-281 |           | ASC         | IgG1       | 3-11      | 4         | ARDMNYKYYYDSSGYPLLDY      | 0        | 1-44           | 3              | AAWDDSLNGWV   | 0             | 0.15                     |                |                                    |
| HK CV38-284 |           | ASC         | IgA1       | 3-49      | 4         | IRARYYYDSSATFDY           | 18       | 1-39           | 4              | QQCYSLPST     | 18            | n.exp.                   |                |                                    |
| HL CV38-286 |           | ASC         | IgA2       | 3-30      | 6         | AKDASSPVYDFWGSYYNHLGMDV   | 0        | 3-21           | 3              | QVWDDSSDQGV   | 2             | 0.11                     |                |                                    |
| HK CV38-288 |           | ASC         | IgM        | 3-66      | 6         | ARDYTVTGGVDGMDV           | 0        | 3-11           | 1              | QQRSNWPPWT    | 0             | n.exp.                   |                |                                    |
| HK CV38-289 |           | ASC         | IgA1       | 3-23      | 4         | VSRAAVGQPEY               | 44)      | 1D-12          | 3              | QQAYTLPRVT    | 35            | n.exp.                   |                |                                    |
| HK CV48-103 |           | S1-MBC      | IgG1       | 3-49      | 6         | SRFYDYWNTFGLLLGSLTFYHMDV  | 22       | 4-1            | 1              | QQYCYTPWT     | 13            | 0.07                     |                |                                    |
| HL CV48-104 |           | S1-MBC      | IgG1       | 1-69      | 5         | ARDGQQLVRGWFPD            | 0        | 2-14           | 1              | SSYSSSTLYV    | 2             | 6.93                     | ++             | >250                               |
| HL CV48-107 |           | S1-MBC      | IgG1       | 4-39      | 4         | ASENDYGEHDY               | 0        | 4-60           | 2              | ETWDSNTRKVV   | 1             | 0.1                      |                |                                    |
| HL CV48-109 |           | S1-MBC      | IgG1       | 3-30      | 4         | VKGDTSAYWPSLLIS           | 34       | 2-14           | 2              | GSYATGSSPVV   | 17            | 0.10                     |                |                                    |

| mAb          | Clonality | Source cell | Ig isotype | IGHV gene | IGHJ gene                 | CDR H3       | SHM IGHV | IGKV/IGLV gene | IGKJ/IGLJ gene | CDR L3      | SHM IGKV/IGLV | S1 reactivity (OD ratio) | RBD reactivity | Estimated IC <sub>50</sub> (ng/ml) |  |
|--------------|-----------|-------------|------------|-----------|---------------------------|--------------|----------|----------------|----------------|-------------|---------------|--------------------------|----------------|------------------------------------|--|
| HK CV48-110  | S1-MBC    | IgA1        | 3-33       | 4         | ARDARYSAYELPDYFFDL        | 17           | 1-5      | 1              | QQYKGSWAT      | 10          | n.exp.        |                          |                |                                    |  |
| HL CV48-113  | S1-MBC    | IgG1        | 3-33       | 6         | ARDGLDDDDYIWGSFKIRYYYYMDV | 0            | 4-69     | 2              | QTWGTGINVV     | 1           | 0.08          |                          |                |                                    |  |
| HL CV48-119  | S1-MBC    | IgA2        | 3-23       | 4         | AKTDRHWNHCD               | 18           | 2-14     | 2              | SSYTGSSSTLVA   | 18          | 0.08          |                          |                |                                    |  |
| HL CV48-123  | S1-MBC    | IgM         | 1-3        | 4         | ARNGGGLDQ                 | 21           | 2-14     | 2              | CSSTTSSTAV     | 12          | n.exp.        |                          |                |                                    |  |
| HK CV-X1-102 | S1-MBC    | IgG1        | 1-69       | 6         | ARSPRPLIVVAEDGMDV         | 1            | 3-20     | 3              | QQYGSPPFT      | 1           | 6.81          | ++                       | >250           |                                    |  |
| HL CV-X1-109 | S1-MBC    | IgG1        | 1-2        | 4         | ARGPLFWDTAMANFDY          | 0            | 2-14     | 3              | N/A            | 4           | 0.12          |                          |                |                                    |  |
| HK CV-X1-111 | S1-MBC    | IgM         | 3-49       | 4         | NRELHNSVVVGVMGY           | 17           | 4-1      | 2              | HHYYSPPYA      | 7           | 0.16          |                          |                |                                    |  |
| HK CV-X1-112 | S1-MBC    | IgM         | 3-23       | 4         | AKVGSWGWAFFDY             | 16           | 3-15     | 1              | QQYNKWPRT      | 5           | 0.09          |                          |                |                                    |  |
| HL CV-X1-119 | S1-MBC    | IgG1        | 4-59       | 6         | ARDRIMPLSYYYYYGMDV        | 0            | 1-44     | 3              | AAWDDSLNGWV    | 0           | 0.17          |                          |                |                                    |  |
| HK CV-X1-126 | S1-MBC    | IgG1        | 3-53       | 6         | ARDLSEGGMDV               | 2            | 1-12     | 4              | QQANGFPPL      | 2           | 11.78         | ++                       | 25-250         |                                    |  |
| HK CV-X1-128 | S1-MBC    | IgG1        | 5-51       | 6         | ARTYDFWSGGFYDMDV          | 3            | 3-11     | 3              | QQRSNWPT       | 0           | 0.13          |                          |                |                                    |  |
| HL CV-X1-131 | S1-MBC    | IgG1        | 3-30       | 4         | ARMATTYPEHDPSLY           | 2            | 3-21     | 3              | QVWDDSSDHVV    | 2           | 10.74         | ++                       | >250           |                                    |  |
| HK CV-X1-136 | ASC       | IgM         | 4-31       | 5         | AAWRGFAATGFDS             | 21           | 1-9      | 3              | QQLKSYPLT      | 7           | 0.1           |                          |                |                                    |  |
| HK CV-X1-137 | ASC       | IgA1        | 1-8        | 3         | ATEGTLTMTAGAFDL           | 26           | 1-12     | 2              | QQTDFPYT       | 18          | 0.17          |                          |                |                                    |  |
| HK CV-X1-140 | ASC       | IgA1        | 1-69       | 4         | ARFGGTSQSSGYYGFDN         | 23           | 2-28     | 2              | MQPLQTPYT      | 11          | 0.08          |                          |                |                                    |  |
| HL CV-X1-141 | ASC       | IgG1        | 3-23       | 6         | VTHDFPDWPPGGMDV           | 18           | 6-57     | 3              | QSYDWSNQGCV    | 10          | 0.16          |                          |                |                                    |  |
| HK CV-X1-142 | ASC       | IgG2        | 1-18       | 4         | STRGMAPHDY                | 28           | 1-39     | 1              | HQTYDWT        | 33          | n.exp.        |                          |                |                                    |  |
| HK CV-X1-143 | ASC       | IgG1        | 3-11       | 4         | ARDLGYSTRFDY              | 0            | 1-33     | 4              | QQYDNLPLT      | 0           | 6.76          | ++                       | >250           |                                    |  |
| HK CV-X1-145 | ASC       | IgG1        | 5-51       | 4         | AREDLTGPDY                | 8            | 2-30     | 2              | MQGTHWPNT      | 1           | 0.16          |                          |                |                                    |  |
| HL CV-X1-146 | ASC       | IgG1        | 3-23       | 4         | ANNYYDNSGPDY              | 30           | 6-57     | 3              | QSNDDGSPSWV    | 20          | 0.15          |                          |                |                                    |  |
| HL CV-X1-150 | ASC       | IgG1        | 5-51       | 4         | ARHLVCGGSCYPFDY           | 0            | 3-21     | 3              | QVWDDSSDHQV    | 1           | 0.33          |                          |                |                                    |  |
| HL CV-X1-153 | ASC       | IgG3        | 3-33       | 4         | ARDWFWRLGGVDY             | 0            | 8-61     | 2              | VLYMGSGLVV     | 2           | 0.16          |                          |                |                                    |  |
| HL CV-X1-157 | ASC       | IgA1        | 3-48       | 6         | ATSYDPSSAYSAHYAMDV        | 32           | 2-14     | 2              | TSYTSLSPVV     | 20          | 0.09          |                          |                |                                    |  |
| HK CV-X1-164 | ASC       | IgG1        | 1-2        | 6         | ARSFGGFGGNYGMDV           | 3            | 1-39     | 5              | QQSYSTPIT      | 0           | 0.13          |                          |                |                                    |  |
| HL CV-X1-165 | ASC       | IgA2        | 3-48       | 4         | ARDPIGTGSDY               | 13           | 1-51     | 2              | GTWDDSLNAGV    | 9           | 0.13          |                          |                |                                    |  |
| HK CV-X1-167 | ASC       | IgA2        | 3-74       | 5         | ARAHSTTLYGWFDP            | 17           | 3-20     | 1              | QHVVSSPLT      | 13          | 0.09          |                          |                |                                    |  |
| HL CV-X1-171 | ASC       | IgA2        | 4-34       | 4         | ARGFRKGSTFN               | 13           | 2-14     | 3              | SSYTTSNTRT     | 15          | 0.09          |                          |                |                                    |  |
| HK CV-X1-172 | ASC       | IgG1        | 3-48       | 6         | ARDRLTIFGVAIDYYGMDV       | 0            | 1-12     | 4              | QQANSFPALT     | 0           | 0.1           |                          |                |                                    |  |
| HK CV-X1-173 | ASC       | IgG1        | 3-30       | 3         | AKDYDSALCTGGTCTDFADF      | 27           | 1-27     | 1              | QNYNSAPPWT     | 11          | 0.24          |                          |                |                                    |  |
| HL CV-X1-174 | ASC       | IgG1        | 3-21       | 6         | ATVQGDYVAGRAYYYGMDV       | 0            | 3-1      | 2              | QAWDSSSTAV     | 0           | 0.10          |                          |                |                                    |  |
| HK CV-X1-175 | ASC       | IgG1        | 1-69       | 4         | ARGLGTHLDC                | 1            | 4-1      | 3              | QQYYSTGFT      | 1           | 1.99          | -                        | n.t.           |                                    |  |
| HL CV-X1-177 | ASC       | IgG1        | 3-30       | 4         | ARAETPASEIDY              | 0            | 3-1      | 2              | QAWDSSHVV      | 1           | 0.08          |                          |                |                                    |  |
| HK CV-X1-178 | ASC       | IgA1        | 3-49       | 6         | TRDRPIDYGDHLHIYYGLDV      | 22           | 2-28     | 2              | MQALQTPPT      | 8           | 0.1           |                          |                |                                    |  |
| HK CV-X1-180 | ASC       | IgA1        | 4-39       | 5         | LKDRTLQGNWFDV             | 26           | 3-11     | 5              | QQRDRWPPVT     | 14          | 0.09          |                          |                |                                    |  |
| HL CV-X1-183 | X1-1      | ASC         | IgG1       | 3-30      | 4                         | ASKSPERGSFDY | 26       | 2-14           | 1              | SSYTNSSSLYV | 7             | n.exp.                   |                |                                    |  |
| HL CV-X1-188 | ASC       | IgM         | 4-4        | 5         | AKGGGPIVA                 | 14           | 4-60     | 2              | ETWDSNTRL      | 8           | 0.08          |                          |                |                                    |  |
| HL CV-X1-189 | ASC       | IgG1        | 3-23       | 6         | AKGRYYDFWSPMPYGMV         | 1            | 2-14     | 3              | SSYTSSTLGV     | 10          | 0.09          |                          |                |                                    |  |
| HL CV-X1-190 | X1-1      | ASC         | IgG1       | 3-30      | 4                         | ANTSPGRGSFDY | 9        | 2-14           | 1              | SSYTNSTLYV  | 13            | 0.08                     |                |                                    |  |
| HK CV-X1-191 | ASC       | IgG1        | 4-31       | 4         | ARQLRFLEWQYFDY            | 0            | 1-33     | 4              | QQYDNLPT       | 0           | n.exp.        |                          |                |                                    |  |
| HK CV-X1-195 | ASC       | IgA1        | 3-64       | 4         | VKGWGVKASSLGGDY           | 20           | 3-11     | 4              | HQRSDWPRLT     | 11          | n.exp.        |                          |                |                                    |  |
| HK CV-X2-103 | S1-MBC    | IgA1        | 3-15       | 5         | TTWRLGQDWFDV              | 17           | 1-39     | 4              | QQSYSAPLT      | 14          | 0.81          | ++                       | >250           |                                    |  |
| HL CV-X2-105 | S1-MBC    | IgA1        | 3-73       | 6         | TRRFDPNQRNDYYALDF         | 12           | 1-44     | 1              | SAWDDSLNGYV    | 9           | 3.48          | +                        | n.t.           |                                    |  |
| HK CV-X2-106 | S1-MBC    | IgG1        | 1-69       | 6         | ATRKETTVTSLVYGMV          | 1            | 1-39     | 2              | QQSYSTPYT      | 2           | 9.14          | ++                       | 250            |                                    |  |
| HK CV-X2-107 | X2-2      | S1-MBC      | IgA1       | 3-66      | 4                         | ARGKVGATGFY  | 15       | 3-20           | 2              | QQYGSSPPMYT | 8             | n.exp.                   |                |                                    |  |
| HK CV-X2-108 | X2-2      | S1-MBC      | IgA1       | 3-66      | 4                         | ARGKVGATGFED | 10       | 3-20           | 2              | QQYGSSPPMYT | 8             | n.exp.                   |                |                                    |  |
| HK CV-X2-109 | S1-MBC    | IgM         | 5-51       | 3         | ARLAHYDRSGYSRADDADFV      | 7            | 3-15     | 2              | QQYNNWPPVYT    | 2           | 6.81          | ++                       | >250           |                                    |  |
| HK CV-X2-117 | X2-2      | S1-MBC      | IgA1       | 3-66      | 4                         | ARGKVGATGFED | 10       | 3-20           | 2              | QQYGSSPPMYT | 9             | 0.08                     |                |                                    |  |
| HK CV-X2-118 | S1-MBC    | IgG1        | 3-30       | 4         | AKTGGPYCSGGSCYSALMDY      | 0            | 1-33     | 1              | QQYDNLPT       | 0           | n.exp.        |                          |                |                                    |  |
| HK CV-X2-123 | S1-MBC    | IgA1        | 4-4        | 6         | ARDRTREGYHDTLTGEFYFGTDV   | 33           | 3-20     | 2              | QQYAMSPVT      | 27          | n.exp.        |                          |                |                                    |  |

For clonality analysis mAbs from an identical donor were identified as clones when sharing the same V and J gene on both heavy and light chain and showing similarities within amino acid sequences of both CDR3. S1 reactivity was determined as a normalized optical density (OD) measured by SARS-CoV-2-S1 ELISA, with values above 0.5 considered as positive. From S1+ mAbs specificity to the RBD was determined using an RBD-ELISA and noted as negative (-), positive (+) or strongly positive (++), when detectable at 10 ng/ml. All strongly positive RBD+ mAbs were screened for neutralization of authentic SARS-CoV-2 (Fig. 1A), from which the  $IC_{50}$  was estimated.

Abbreviations: ASC = antibody-secreting cell, S1-MBC = S1-SARS-CoV2-enriched memory B cell, Ig = immunoglobulin, HC = heavy chain, KC = kappa chain, LC = chain, IGHV/IGHJ = immunoglobulin heavy chain variable/joining gene, IGKV/IGKJ = immunoglobulin kappa chain variable/joining gene, IGLV/IGLJ = immunoglobulin lambda chain variable/joining gene, CDR = complementarity-determining region, SHM = somatic hypermutations, n.exp. = not expressed, n. t. = not tested.

**Supplementary Table ST3 | Public or common antibody response using VH3-53 and VH3-66 genes.**

| mAb                  | IGHV    | IGHJ | CDR H3            | IGKV/IGLV | IGKJ/IGLJ | CDR L3       |
|----------------------|---------|------|-------------------|-----------|-----------|--------------|
| RBD-494 (Cao et al.) | 3-53    | 6    | ARDLVVYGMDV       | 1-9       | 4         | QQLNSYPFT    |
| HK CV07-202          | 3-53*01 | 6*02 | ARDLYYYGMDV       | 1-9*01    | 4*01      | QQLNNYSVT    |
| HL CV07-275          | 3-66*01 | 4*02 | ARDYYDSSGYSSGGLGY | 2-8*01    | 1*01      | SSYAGSNNFV   |
| HL CV38-148          | 3-66*01 | 4*02 | ARSAPLVGAYSGIYFDY | 9-49*01   | 2*01      | GADHGSGSNFVV |
| HK CV38-221          | 3-66*01 | 4*02 | ARGFGDYFDY        | 3-20*01   | 2*01      | QQLYT        |
| HK CV38-113          | 3-53*04 | 4*02 | ARGGRLADAAGDY     | 1-33*01   | 2*02      | QQYDNLPSWT   |
| HK CV38-139          | 3-53*01 | 4*02 | ARGHYDLFDY        | 1-9*01    | 3*01      | QQLNSYPPGT   |
| HL CV38-183          | 3-53*01 | 6*02 | ARGDGWDNYYYGMDV   | 1-40*01   | 2*01      | QSYDSSLGSGV  |
| HK CV-X1-126         | 3-53*04 | 6*02 | ARDLSEGGMDV       | 1-12*01   | 4*01      | QQANGFSAL    |

Abbreviations: IGHV/IGHJ = immunoglobulin heavy chain variable/joining gene, IGKV/IGKJ = immunoglobulin kappa chain variable/joining gene. IGLV/IGLJ = immunoglobulin lambda chain variable/joining gene, CDR = complementarity-determining region.

**Supplementary Table ST4 | Biophysical and functional characterization of the 18 most potent SARS-CoV-2 neutralizing mAbs.**

| mAb       | EC <sub>50</sub><br>(ng/ml) | K <sub>a</sub><br>(s <sup>-1</sup> ) | K <sub>d</sub><br>(M <sup>-1</sup> s <sup>-1</sup> ) | K <sub>D</sub><br>(M) | IC <sub>50</sub><br>(ng/ml) | ACE2 binding<br>reduction (%) | Tissue<br>reactivity |
|-----------|-----------------------------|--------------------------------------|------------------------------------------------------|-----------------------|-----------------------------|-------------------------------|----------------------|
| CV05-163  | 3.8                         | 8.48 E+06                            | 1.86 E-03                                            | 2.20 E-10             | 16.3                        | 9.6                           | none                 |
| CV07-200  | 9.0                         | n/a                                  | n/a                                                  | n/a                   | 14.5                        | none                          | B / L*               |
| CV07-209  | 4.1                         | 2.40 E+07                            | 1.44 E-04                                            | 6.00 E-12             | 3.1                         | 73.9                          | none                 |
| CV07-222  | 5.5                         | 2.98 E+07                            | 2.07 E-04                                            | 6.97 E-12             | 7.8                         | 36.9                          | B / L / C            |
| CV07-250  | 8.7                         | 4.05 E+06                            | 2.28 E-04                                            | 5.64 E-11             | 3.5                         | 59.9                          | none                 |
| CV07-255  | 4.8                         | n/a                                  | n/a                                                  | n/a                   | 14.5                        | 51.6                          | L / H / C / K        |
| CV07-262  | 12.1                        | 4.27 E+06                            | 3.37 E-04                                            | 7.90 E-11             | 7.1                         | 25.5                          | none                 |
| CV07-270  | 14.2                        | n/a                                  | n/a                                                  | n/a                   | 82.3                        | 7.5                           | L / H* / C           |
| CV07-283  | 4.0                         | 1.52 E+07                            | 7.24 E-04                                            | 4.75 E-11             | 16.9                        | 38.0                          | none                 |
| CV07-287  | 5.9                         | 5.11 E+06                            | 8.14 E-04                                            | 1.60 E-10             | 41.7                        | 12.4                          | none                 |
| CV07-315  | 7.2                         | 2.36 E+07                            | 2.62 E-04                                            | 1.12 E-11             | 24.9                        | none                          | none                 |
| CV38-113  | 5.2                         | 2.33 E+06                            | 3.12 E-04                                            | 1.34 E-10             | 20.8                        | 51.2                          | none                 |
| CV38-139  | 8.9                         | 3.62 E+05                            | 1.00 E-04                                            | 2.77 E-10             | 73.2                        | 14.9                          | none                 |
| CV38-142  | 5.6                         | 6.31 E+05                            | 6.60 E-04                                            | 1.05 E-09             | 23.2                        | 26.9                          | none                 |
| CV38-183  | 5.4                         | 2.31 E+06                            | 1.37 E-04                                            | 5.93 E-11             | 3.7                         | 65.9                          | none                 |
| CV38-221  | 6.4                         | 7.45 E+05                            | 3.71 E-04                                            | 4.99 E-10             | 172.6                       | 50.1                          | none                 |
| CV-X1-126 | 5.5                         | 4.12 E+05                            | 9.98 E-05                                            | 2.43 E-10             | 71.7                        | 44.2                          | none                 |
| CV-X2-106 | 5.6                         | n/a                                  | n/a                                                  | n/a                   | 17.6                        | 19.9                          | none                 |

Abbreviations: EC<sub>50</sub> = half-maximal effective concentration, K<sub>a</sub> = association rate, K<sub>d</sub> = dissociation rate, K<sub>D</sub> = equilibrium dissociation constant, IC<sub>50</sub> = half-maximal inhibitory concentration, B = brain, L = lung, H = heart, C = colon, K = kidney. An asterisk (\*) indicates weak binding.

**Supplementary Table ST5 | X-ray data collection and refinement statistics.**

| Data collection                                                      |                                                |                       |
|----------------------------------------------------------------------|------------------------------------------------|-----------------------|
|                                                                      | CV07-250 + RBD                                 | CV07-270 + RBD        |
| Beamline                                                             | SSRL 12-1                                      | SSRL 12-1             |
| Wavelength (Å)                                                       | 0.97946                                        | 0.97946               |
| Space group                                                          | P 2 <sub>1</sub> 2 <sub>1</sub> 2 <sub>1</sub> | C 1 2 1               |
| Unit cell parameters                                                 |                                                |                       |
| a, b, c (Å)                                                          | 68.0, 80.1, 153.7                              | 157.0, 151.8, 66.0    |
| α, β, γ (°)                                                          | 90, 90, 90                                     | 90, 95.4, 90          |
| Resolution (Å) <sup>a</sup>                                          | 50.0–2.55 (2.59–2.55)                          | 50.0–2.70 (2.75–2.70) |
| Unique reflections <sup>a</sup>                                      | 27,890 (2,659)                                 | 41,624 (2,089)        |
| Redundancy <sup>a</sup>                                              | 8.8 (6.5)                                      | 4.7 (3.6)             |
| Completeness (%) <sup>a</sup>                                        | 99.6 (98.9)                                    | 90.8 (90.8)           |
| <I/σ> <sup>a</sup>                                                   | 17.3 (1.1)                                     | 6.7 (1.1)             |
| R <sub>sym</sub> <sup>b</sup> (%) <sup>a</sup>                       | 11.9 (94.6)                                    | 19.9 (80.6)           |
| R <sub>pim</sub> <sup>b</sup> (%) <sup>a</sup>                       | 4.1 (38.9)                                     | 9.9 (50.5)            |
| CC <sub>1/2</sub> <sup>c</sup> (%) <sup>a</sup>                      | 99.5 (71.0)                                    | 97.6 (67.6)           |
| Refinement statistics                                                |                                                |                       |
| Resolution (Å)                                                       | 43.2–2.55                                      | 49.7–2.72             |
| Reflections (work)                                                   | 27,883                                         | 39,568                |
| Reflections (test)                                                   | 2,656                                          | 2,055                 |
| R <sub>cryst</sub> <sup>d</sup> / R <sub>free</sub> <sup>e</sup> (%) | 20.7/25.9                                      | 22.6/26.7             |
| No. of atoms                                                         | 4,525                                          | 9,233                 |
| Macromolecules                                                       | 4,420                                          | 9,165                 |
| Glycans                                                              | 28                                             | 28                    |
| Solvent                                                              | 77                                             | 40                    |
| Average B-value (Å <sup>2</sup> )                                    | 52                                             | 44                    |
| Macromolecules                                                       | 52                                             | 44                    |
| Fab                                                                  | 46                                             | 42                    |
| RBD                                                                  | 66                                             | 46                    |
| Glycans                                                              | 100                                            | 77                    |
| Solvent                                                              | 49                                             | 57                    |
| Wilson B-value (Å <sup>2</sup> )                                     | 51                                             | 39                    |
| RMSD from ideal geometry                                             |                                                |                       |
| Bond length (Å)                                                      | 0.005                                          | 0.007                 |
| Bond angle (°)                                                       | 0.74                                           | 1.27                  |
| Ramachandran statistics (%)                                          |                                                |                       |
| Favored                                                              | 96.1                                           | 96.8                  |
| Outliers                                                             | 0.2                                            | 0.0                   |
| PDB code                                                             | 6XKQ                                           | 6XKP                  |

<sup>a</sup> Numbers in parentheses refer to the highest resolution shell.

<sup>b</sup>  $R_{sym} = \sum_{hkl} \sum_i |I_{hkl,i} - \langle I_{hkl} \rangle| / \sum_{hkl} \sum_i I_{hkl,i}$  and  $R_{pim} = \sum_{hkl} (1/(n-1))^{1/2} \sum_i |I_{hkl,i} - \langle I_{hkl} \rangle| / \sum_{hkl} \sum_i I_{hkl,i}$  where  $I_{hkl,i}$  is the scaled intensity of the  $i^{\text{th}}$  measurement of reflection  $h, k, l$ ,  $\langle I_{hkl} \rangle$  is the average intensity for that reflection, and  $n$  is the redundancy.

<sup>c</sup>  $CC_{1/2}$  = Pearson correlation coefficient between two random half datasets.

<sup>d</sup>  $R_{cryst} = \sum_{hkl} |F_o - F_c| / \sum_{hkl} |F_o| \times 100$ , where  $F_o$  and  $F_c$  are the observed and calculated structure factors, respectively.

<sup>e</sup>  $R_{free}$  was calculated as for  $R_{cryst}$ , but on a test set comprising 5% of the data excluded from refinement.

**Supplementary Table ST6 | Hydrogen bonds and salt bridges identified at the antibody-RBD interface using the PISA program.**

| CV07-250              | Distance (Å) | SARS-CoV-2 RBD |
|-----------------------|--------------|----------------|
| <b>Hydrogen bonds</b> |              |                |
| H:TYR98[N]            | 3.0          | A:ALA475[O]    |
| H:ASN31[ND2]          | 3.4          | A:SER477[OG]   |
| H:ASN100C[ND2]        | 3.8          | A:GLY485[O]    |
| H:ASN100C[ND2]        | 2.9          | A:PHE486[O]    |
| H:ASN97[ND2]          | 2.8          | A:ASN487[OD1]  |
| H:ASN97[ND2]          | 2.7          | A:TYR489[OH]   |
| H:TYR100B[N]          | 3.5          | A:TYR489[OH]   |
| H:ASP96[OD1]          | 3.0          | A:SER477[N]    |
| H:ASP96[OD2]          | 2.7          | A:SER477[OG]   |
| H:ASP96[OD2]          | 3.5          | A:THR478[N]    |
| H:ASP96[OD2]          | 2.9          | A:THR478[OG1]  |
| H:SER95[OG]           | 2.9          | A:ASN487[ND2]  |
| H:PHE100[O]           | 3.4          | A:TYR489[OH]   |
| L:SER27A[OG]          | 3.2          | A:TYR505[OH]   |
| L:HIS31[N]            | 3.1          | A:GLN493[OE1]  |
| L:SER67[OG]           | 3.5          | A:GLY446[O]    |
| L:GLY68[N]            | 3.1          | A:GLY446[O]    |
| L:GLY68[N]            | 3.1          | A:TYR449[OH]   |
| L:ASN69[N]            | 3.8          | A:GLN498[OE1]  |
| L:ASN69[ND2]          | 3.7          | A:GLN498[OE1]  |
| L:TYR49[OH]           | 3.5          | A:PHE486[N]    |
| <b>CV07-270</b>       |              |                |
| CV07-270              | Distance (Å) | SARS-CoV-2 RBD |
| <b>Hydrogen bonds</b> |              |                |
| H:TYR100B[OH]         | 2.8          | A:SER349[OG]   |
| H:SER98[N]            | 3.2          | A:GLY447[O]    |
| H:SER98[OG]           | 3.8          | A:GLY447[O]    |
| H:SER98[OG]           | 3.2          | A:ASN448[OD1]  |
| H:ARG100G[NH2]        | 2.9          | A:GLU484[OE1]  |
| H:ARG100G[NH1]        | 3.2          | A:GLU484[OE2]  |
| H:ARG100G[NH2]        | 3.0          | A:GLU484[OE2]  |
| H:THR28[OG1]          | 3.2          | A:LYS444[NZ]   |
| H:ASP31[OD1]          | 2.7          | A:ARG346[NH1]  |
| H:ASP31[OD2]          | 2.7          | A:LYS444[NZ]   |
| H:SER98[O]            | 2.7          | A:TYR449[N]    |
| H:SER98[O]            | 3.3          | A:ASN450[N]    |
| H:TYR100B[OH]         | 3.6          | A:SER349[N]    |
| <b>Salt bridges</b>   |              |                |
| H:ARG100G[NH2]        | 2.9          | A:GLU484[OE1]  |
| H:ARG100G[NH1]        | 3.2          | A:GLU484[OE2]  |
| H:ARG100G[NH2]        | 3.0          | A:GLU484[OE2]  |
| H:ASP31[OD1]          | 2.7          | A:ARG346[NH1]  |
| H:ASP31[OD1]          | 3.4          | A:ARG346[NE]   |
| H:ASP31[OD2]          | 2.7          | A:LYS444[NZ]   |



**Supplementary Table ST7 | Histopathological scoring of lung tissue from COVID-19 hamster model.**

| Animal number | Time point (dpi) | pneumonia              |                         |             |             |             |                                                  |                                     |                                                       |                                   |                                                            | Alveolar edema <sup>c</sup> | Perivascular edema <sup>c</sup> | Perivascular lymphocytic cuffing | Endotheliitis | <sup>a</sup> Bronchitis score | <sup>b</sup> Regeneration score | <sup>c</sup> Edema score |
|---------------|------------------|------------------------|-------------------------|-------------|-------------|-------------|--------------------------------------------------|-------------------------------------|-------------------------------------------------------|-----------------------------------|------------------------------------------------------------|-----------------------------|---------------------------------|----------------------------------|---------------|-------------------------------|---------------------------------|--------------------------|
|               |                  | % Affected lung tissue | Degree of inflammation* | Lymphocytes | Macrophages | Neutrophils | Epithelial cell necrosis of bronchi <sup>a</sup> | Bronchial inflammation <sup>a</sup> | Hyperplasia of bronchial epithelia cells <sup>b</sup> | Alveolar epithelial cell necrosis | Hyperplasia type II alveolar epithelial cells <sup>b</sup> |                             |                                 |                                  |               |                               |                                 |                          |
| P1            | 3                | <5                     | 1.0                     | 0.0         | 1.0         | 1.0         | 0.0                                              | 0.0                                 | 0.0                                                   | 1.0                               | 0.0                                                        | 0.0                         | 0.0                             | 1.0                              | 0.0           | 0.0                           | 0.0                             | 0.0                      |
| P2            | 3                | <5                     | 1.0                     | 1.0         | 1.0         | 1.0         | 0.0                                              | 0.0                                 | 0.0                                                   | 1.0                               | 0.0                                                        | 0.0                         | 0.0                             | 1.0                              | 0.0           | 0.0                           | 0.0                             | 0.0                      |
| P3            | 3                | 5                      | 1.0                     | 1.0         | 1.0         | 1.0         | 0.0                                              | 0.0                                 | 0.0                                                   | 1.0                               | 0.0                                                        | 0.0                         | 0.0                             | 0.0                              | 0.0           | 0.0                           | 0.0                             | 0.0                      |
| T1            | 3                | 10                     | 1.5                     | 1.0         | 1.0         | 1.0         | 0.0                                              | 0.0                                 | 0.0                                                   | 1.0                               | 0.0                                                        | 0.0                         | 0.0                             | 1.0                              | 0.0           | 0.0                           | 0.0                             | 0.0                      |
| T2            | 3                | 25                     | 3.0                     | 2.5         | 2.0         | 3.5         | 3.5                                              | 4.0                                 | 0.0                                                   | 3.0                               | 2.0                                                        | 1.5                         | 0.0                             | 2.0                              | 2.0           | 3.8                           | 1.0                             | 0.8                      |
| T3            | 3                | 15                     | 2.0                     | 2.0         | 2.0         | 2.0         | 0.0                                              | 0.0                                 | 0.0                                                   | 2.0                               | 1.0                                                        | 0.0                         | 1.0                             | 1.0                              | 0.0           | 0.0                           | 0.5                             | 0.5                      |
| C1            | 3                | 15                     | 2.5                     | 2.0         | 2.0         | 3.0         | 2.5                                              | 3.0                                 | 0.0                                                   | 3.0                               | 1.0                                                        | 2.0                         | 1.0                             | 1.0                              | 2.0           | 3.0                           | 0.5                             | 1.5                      |
| C2            | 3                | 20                     | 2.5                     | 2.5         | 2.0         | 2.5         | 2.5                                              | 3.0                                 | 0.0                                                   | 2.0                               | 1.0                                                        | 0.0                         | 3.0                             | 1.5                              | 2.0           | 3.0                           | 0.5                             | 1.5                      |
| C3            | 3                | 20                     | 2.5                     | 2.0         | 2.5         | 2.5         | 2.0                                              | 2.0                                 | 0.0                                                   | 3.0                               | 2.0                                                        | 0.0                         | 2.0                             | 1.0                              | 2.0           | 2.0                           | 1.0                             | 1.0                      |
| P4            | 5                | 5-10                   | 2.0                     | 2.0         | 2.0         | 1.5         | 0.0                                              | 0.0                                 | 0.0                                                   | 2.0                               | 2.0                                                        | 0.0                         | 1.5                             | 1.0                              | 0.0           | 0.0                           | 1.0                             | 0.8                      |
| P5            | 5                | <5                     | 1.0                     | 1.0         | 1.0         | 1.0         | 0.0                                              | 0.0                                 | 0.0                                                   | 1.0                               | 0.0                                                        | 0.0                         | 1.0                             | 1.0                              | 0.0           | 0.0                           | 0.0                             | 0.5                      |
| P6            | 5                | 15                     | 2.0                     | 2.0         | 2.0         | 2.0         | 0.0                                              | 0.0                                 | 0.0                                                   | 2.0                               | 2.0                                                        | 0.0                         | 0.0                             | 2.0                              | 0.0           | 0.0                           | 1.0                             | 0.0                      |
| T4            | 5                | 5-10                   | 2.0                     | 2.0         | 1.5         | 1.0         | 0.0                                              | 0.0                                 | 0.0                                                   | 1.0                               | 2.0                                                        | 0.0                         | 0.0                             | 2.0                              | 0.0           | 0.0                           | 1.0                             | 0.0                      |
| T5            | 5                | 25                     | 3.0                     | 3.0         | 2.0         | 3.0         | 2.0                                              | 2.0                                 | 0.0                                                   | 3.0                               | 3.0                                                        | 2.0                         | 2.0                             | 3.0                              | 3.0           | 2.0                           | 1.5                             | 2.0                      |
| T6            | 5                | 0                      | 0.0                     | 0.0         | 0.0         | 0.0         | 0.0                                              | 0.0                                 | 0.0                                                   | 0.0                               | 0.0                                                        | 0.0                         | 0.0                             | 0.0                              | 0.0           | 0.0                           | 0.0                             | 0.0                      |
| C4            | 5                | 80                     | 4.0                     | 4.0         | 3.0         | 3.0         | 3.0                                              | 3.0                                 | 3.0                                                   | 3.0                               | 4.0                                                        | 3.0                         | 3.5                             | 3.0                              | 3.5           | 3.0                           | 3.5                             | 3.3                      |
| C5            | 5                | 15-20                  | 2.5                     | 3.0         | 2.5         | 2.0         | 2.0                                              | 2.0                                 | 1.5                                                   | 2.0                               | 2.0                                                        | 2.5                         | 0.0                             | 3.0                              | 2.0           | 2.0                           | 1.8                             | 1.3                      |
| C6            | 5                | 50                     | 4.0                     | 3.5         | 3.0         | 3.0         | 3.0                                              | 3.0                                 | 4.0                                                   | 2.5                               | 4.0                                                        | 3.5                         | 4.0                             | 3.5                              | 3.0           | 3.0                           | 4.0                             | 3.8                      |
| P7            | 13               | 20                     | 2.0                     | 2.0         | 2.0         | 1.0         | 0.0                                              | 0.0                                 | 0.0                                                   | 1.5                               | 0.0                                                        | 1.5                         | 0.0                             | 1.5                              | 0.0           | 0.0                           | 0.8                             | 0.8                      |
| P8            | 13               | 30                     | 2.0                     | 2.0         | 2.0         | 2.0         | 0.0                                              | 0.0                                 | 0.0                                                   | 1.5                               | 0.0                                                        | 0.0                         | 0.0                             | 2.0                              | 0.0           | 0.0                           | 1.0                             | 0.0                      |
| P9            | 13               | 30                     | 2.0                     | 2.0         | 2.0         | 2.0         | 0.0                                              | 1.0                                 | 1.0                                                   | 1.5                               | 0.0                                                        | 0.0                         | 0.0                             | 2.0                              | 0.0           | 0.5                           | 1.5                             | 0.0                      |
| T7            | 13               | 15                     | 2.0                     | 2.0         | 2.0         | 1.5         | 0.0                                              | 0.0                                 | 0.0                                                   | 1.5                               | 0.0                                                        | 0.0                         | 0.0                             | 2.0                              | 0.0           | 0.0                           | 1.0                             | 0.0                      |
| T8            | 13               | 5                      | 1.0                     | 1.5         | 1.0         | 1.0         | 0.0                                              | 0.0                                 | 0.0                                                   | 0.0                               | 0.0                                                        | 0.0                         | 0.0                             | 1.0                              | 0.0           | 0.0                           | 0.5                             | 0.0                      |
| T9            | 13               | 20                     | 1.5                     | 1.5         | 1.0         | 1.5         | 0.0                                              | 0.0                                 | 0.0                                                   | 1.0                               | 0.0                                                        | 0.0                         | 0.0                             | 1.5                              | 0.0           | 0.0                           | 0.8                             | 0.0                      |
| C7            | 13               | 5                      | 1.0                     | 1.0         | 1.0         | 1.0         | 0.0                                              | 0.0                                 | 0.0                                                   | 0.0                               | 0.0                                                        | 0.0                         | 0.0                             | 1.5                              | 0.0           | 0.0                           | 0.8                             | 0.0                      |
| C8            | 13               | 40                     | 2.0                     | 2.0         | 2.0         | 2.0         | 0.0                                              | 1.0                                 | 1.0                                                   | 1.5                               | 0.0                                                        | 0.0                         | 1.5                             | 2.0                              | 0.0           | 0.5                           | 1.5                             | 0.0                      |
| C9            | 13               | 10                     | 1.0                     | 1.0         | 1.0         | 1.0         | 0.0                                              | 1.0                                 | 0.0                                                   | 0.0                               | 0.0                                                        | 0.0                         | 0.0                             | 1.5                              | 0.0           | 0.5                           | 0.8                             | 0.0                      |

Histopathological scoring of formalin-fixed paraffin-embedded lung tissue from hamsters of experimental groups as abbreviated (P = prophylactic, T = therapeutic, C = control) at indicated days post infection (dpi). Degree of inflammation <sup>(\*)</sup> is scaled as (1) minimal, (2) mild,

(3) moderate or (4) severe. For all other parameters rating refers to occurrence rate from (1) sporadic, (2) mild, (3) moderate to (4) severe.

Scores were assessed as means from parameters with corresponding letters as indicated.
